# Supplementary material for: The Development of the Davis Food Glycopedia—A Glycan Encyclopedia of Food
Source: MDPI journal article supplement (doi:10.3390/nu14081639), 2022-04-14
Supplement: s1 [file s1]

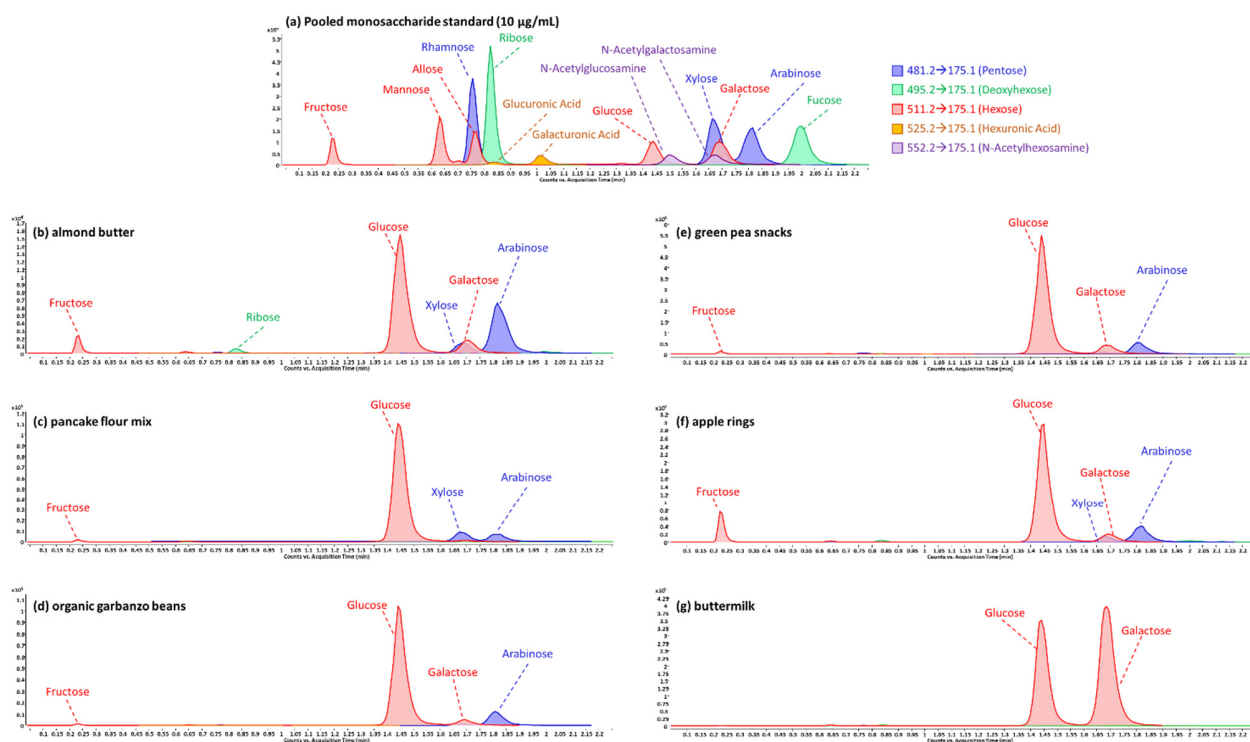

**Supplementary Figure S1.** Dynamic multiple reaction monitoring (dMRM) chromatograms depicting the monosaccharide profiles of (a) a pooled 10 µg/mL monosaccharide standard, (b) almond butter, (c) pancake flour mix, (d) organic garbanzo beans, (e) green pea snacks, (f) apple rings, and (g) buttermilk.

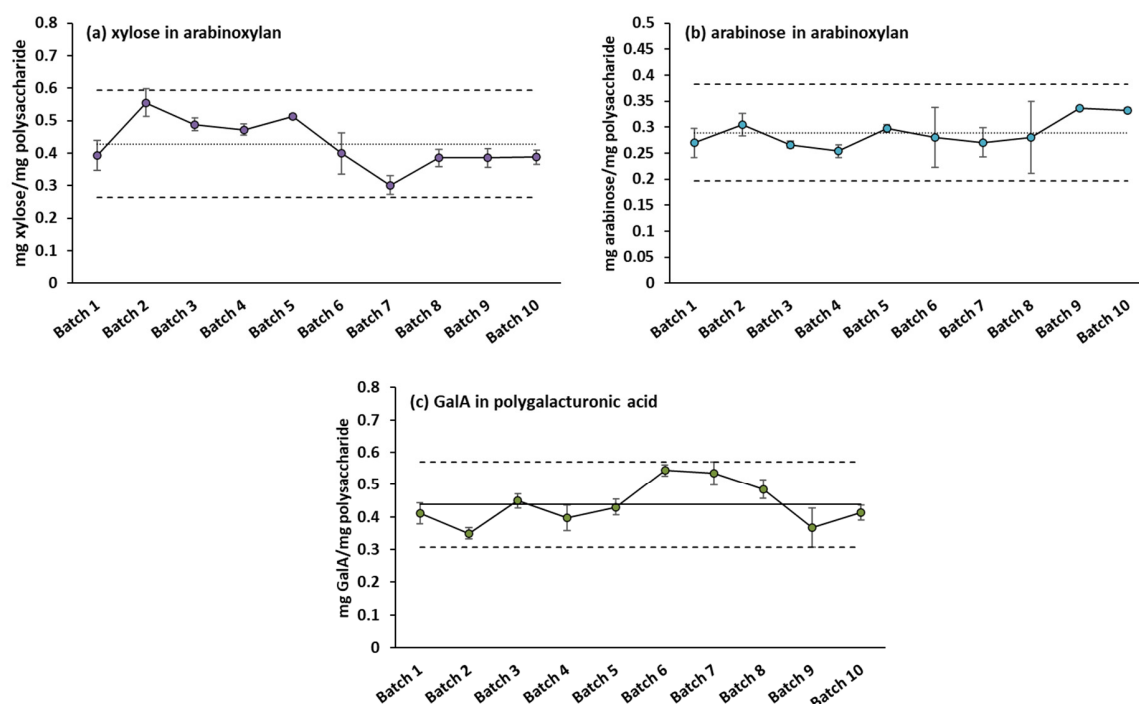

**Supplementary Figure S2.** Control diagrams depicting the polysaccharide standard quality controls (QCs) analyzed with each of ten batches of samples. (a) Xylose measured in the arabinoxylan control. (b) Arabinose measured in the arabinoxylan control. (c) GalA measured in

the polygalacturonic acid control. The dashed lines indicate  $\pm$  two times the standard deviation. The dotted middle lines indicate the average.

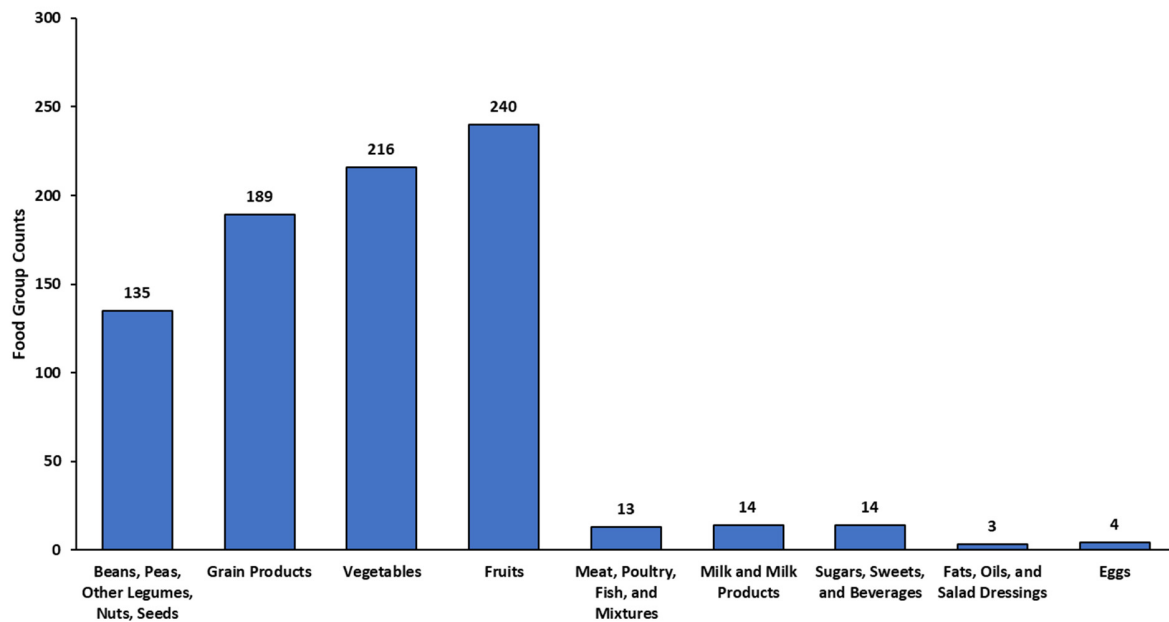

**Supplementary Figure S3.** Number of foods assigned to each of nine total food groups. Those groups containing plant-based foods contributed the largest number while animal-based and low carbohydrate groups contributed the least.

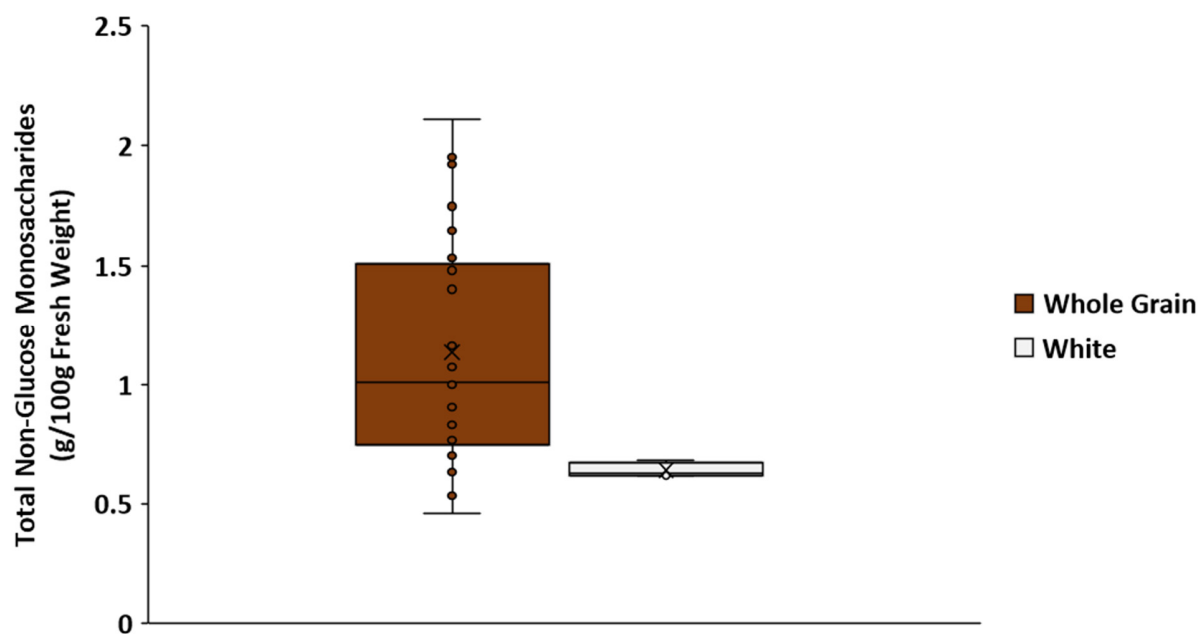

**Supplementary Figure S4.** Difference in total non-glucose monosaccharides between whole grain and “white” grain products. Although not statistically significant, whole grain bread tended to contain more non-glucose residues (mostly from xylose, arabinose, and galactose).

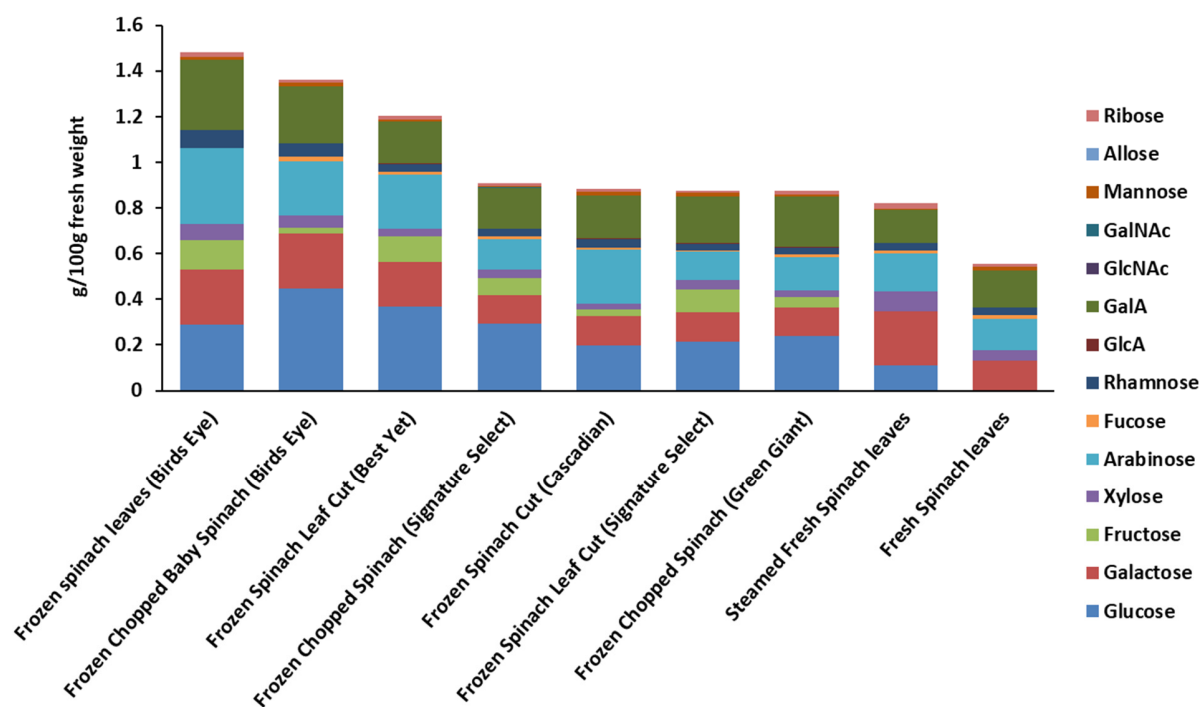

**Supplementary Figure S5.** Monosaccharide compositions of nine spinach samples included in the DFG including frozen varieties from several brands as well as fresh and steamed fresh preparations.

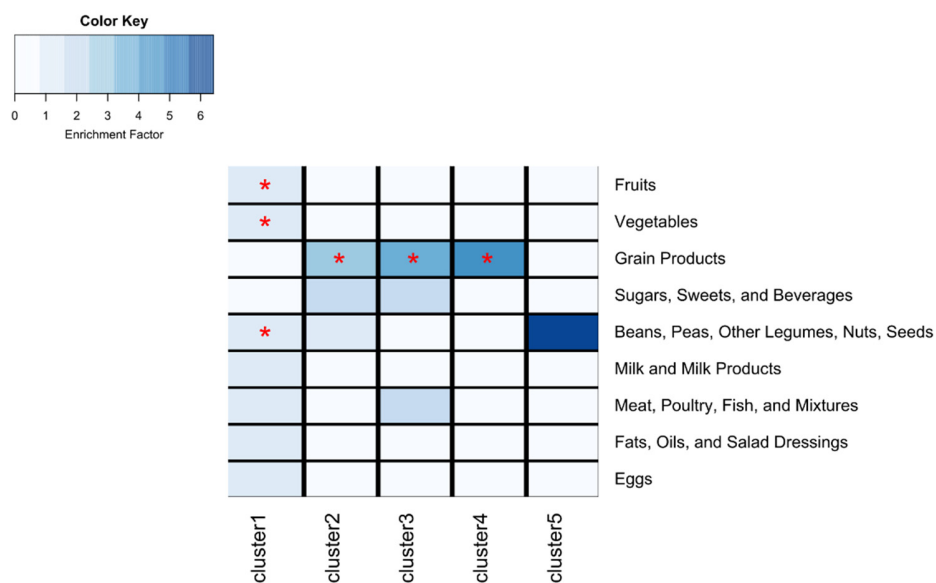

**Supplementary Figure S6.** Enrichment factor heatmap for each food group and cluster. Red asterisk indicates a significance of  $p < 0.05$  using FDR adjusted  $p$ -values derived from a hypergeometric (over-representation) test.

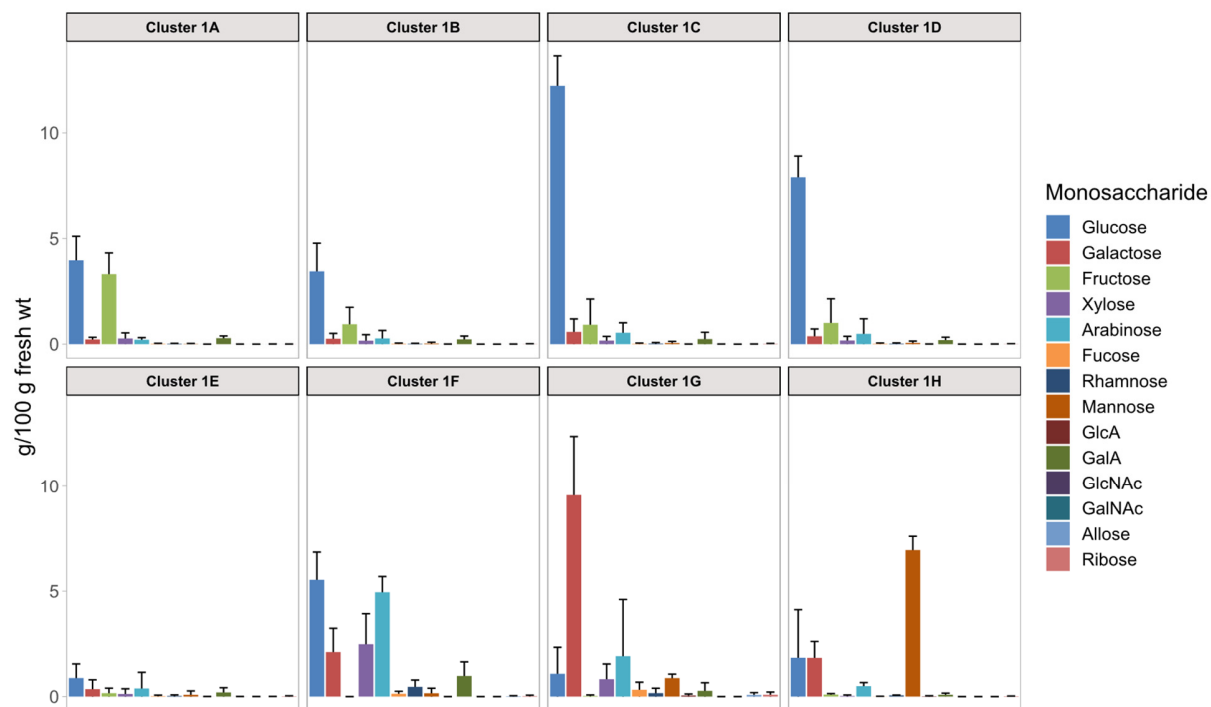

**Supplementary Figure S7.** Average monosaccharide compositions of the sub-clusters A-H of Cluster 1. Error bars represent the standard deviation.

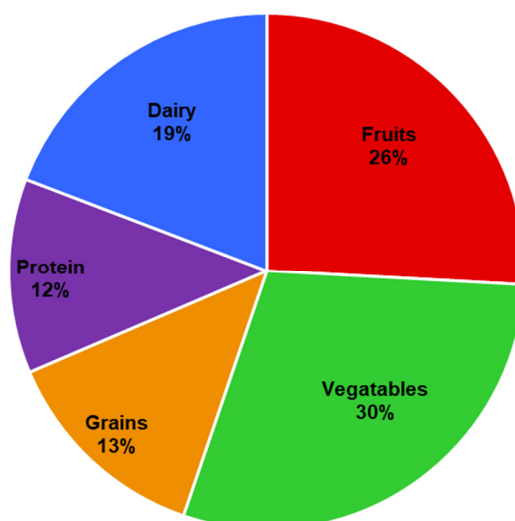

**Supplementary Figure S8.** Mass percentages of food groups used to generate an example meal based on recommendations in the USDA Dietary Guidelines for Americans 2020-2025.

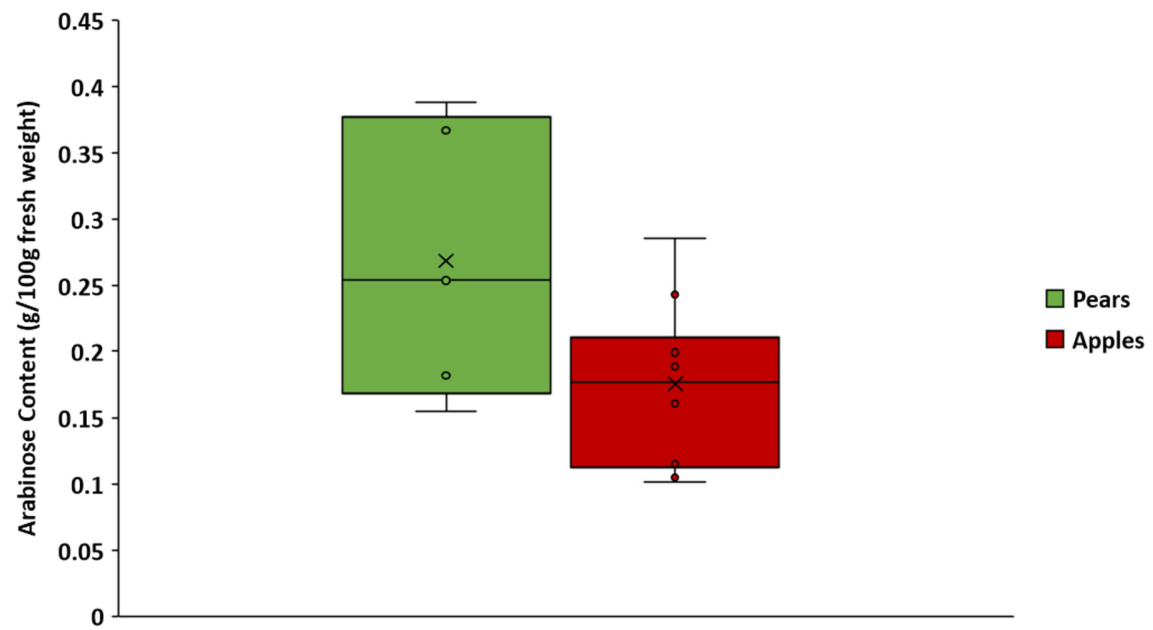

**Supplementary Figure S9.** Although not statistically significant, pear cultivars tended to contain more arabinose content than apple cultivars on average.



**Table S1.** Monosaccharide compositions, food groups, and cluster numbers of all 828 foods surveyed. Units are g/100 fresh weight. N.D = "Not Detected".

| Sample Number | Sample Name                     | Food Group | Moisture Content (%) | Cluster Number | Glucose | Galactose | Fructose | Xylose | Arabinose | Fucose | Rhamnose | GlcA | GalA | GlcNAc | GalNAc | Mannose | Allose | Ribose | Total |
|---------------|---------------------------------|------------|----------------------|----------------|---------|-----------|----------|--------|-----------|--------|----------|------|------|--------|--------|---------|--------|--------|-------|
| 1             | Whole envy apple w/o seed       | Fruits     | 80.79                | cluster1       | 4.55    | 0.17      | 2.42     | 0.12   | 0.20      | 0.04   | 0.01     | N.D  | 0.24 | N.D    | N.D    | N.D     | N.D    | 0.01   | 7.75  |
| 2             | Envy apple flesh only           | Fruits     | 80.79                | cluster1       | 3.61    | 0.18      | 2.05     | 0.14   | 0.14      | 0.05   | 0.01     | N.D  | 0.18 | N.D    | N.D    | N.D     | N.D    | N.D    | 6.37  |
| 3             | Whole jazz apple w/o seed       | Fruits     | 85.29                | cluster1       | 2.53    | 0.14      | 1.81     | 0.17   | 0.10      | 0.05   | 0.01     | N.D  | 0.23 | N.D    | N.D    | N.D     | N.D    | N.D    | 5.04  |
| 4             | Jazz apple flesh only           | Fruits     | 86.70                | cluster1       | 2.40    | 0.09      | 1.73     | 0.14   | 0.06      | 0.03   | 0.01     | N.D  | 0.18 | N.D    | N.D    | N.D     | N.D    | N.D    | 4.63  |
| 5             | Whole Honeycrisp apple w/o seed | Fruits     | 85.73                | cluster1       | 2.43    | 0.10      | 1.96     | 0.09   | 0.11      | 0.03   | 0.01     | N.D  | 0.15 | N.D    | N.D    | 0.00    | N.D    | N.D    | 4.90  |
| 6             | Honeycrisp apple flesh only     | Fruits     | 86.86                | cluster1       | 2.03    | 0.08      | 2.06     | 0.09   | 0.08      | 0.03   | 0.01     | N.D  | 0.12 | N.D    | N.D    | N.D     | N.D    | N.D    | 4.51  |
| 7             | Whole Pink Lady apple w/o seed  | Fruits     | 84.14                | cluster1       | 2.73    | 0.17      | 2.11     | 0.14   | 0.24      | 0.05   | 0.02     | N.D  | 0.30 | N.D    | N.D    | 0.03    | N.D    | N.D    | 5.79  |
| 8             | Pink Lady apple flesh only      | Fruits     | 84.52                | cluster1       | 2.87    | 0.18      | 2.37     | 0.15   | 0.24      | 0.06   | 0.02     | N.D  | 0.24 | N.D    | N.D    | N.D     | N.D    | N.D    | 6.13  |
| 9             | Whole Fuji apple w/o seed       | Fruits     | 83.81                | cluster1       | 2.19    | 0.04      | 2.08     | 0.11   | 0.11      | 0.03   | 0.01     | N.D  | 0.15 | N.D    | N.D    | N.D     | N.D    | N.D    | 4.71  |
| 10            | Fuji apple flesh only           | Fruits     | 83.71                | cluster1       | 2.93    | 0.15      | 2.98     | 0.19   | 0.13      | 0.04   | 0.02     | N.D  | 0.17 | N.D    | N.D    | N.D     | N.D    | N.D    | 6.60  |
| 11            | Whole Gala apple w/o seed       | Fruits     | 85.54                | cluster1       | 2.55    | 0.17      | 2.33     | 0.28   | 0.17      | 0.06   | 0.02     | N.D  | 0.24 | N.D    | N.D    | N.D     | N.D    | N.D    | 5.83  |
| 12            | Gala apple flesh only           | Fruits     | 85.44                | cluster1       | 3.16    | 0.17      | 2.24     | 0.28   | 0.13      | 0.06   | 0.02     | N.D  | 0.21 | N.D    | N.D    | N.D     | N.D    | N.D    | 6.26  |
| 13            | Whole Golden Del apple w/o seed | Fruits     | 84.70                | cluster1       | 2.83    | 0.16      | 2.23     | 0.12   | 0.19      | 0.03   | 0.02     | N.D  | 0.27 | N.D    | N.D    | N.D     | N.D    | N.D    | 5.85  |

|    |                                          |        |       |          |      |      |      |      |      |      |      |     |      |     |     |      |      |      |      |
|----|------------------------------------------|--------|-------|----------|------|------|------|------|------|------|------|-----|------|-----|-----|------|------|------|------|
| 14 | Golden Del<br>apple flesh<br>only        | Fruits | 85.07 | cluster1 | 2.44 | 0.16 | 1.38 | 0.12 | 0.19 | 0.07 | 0.02 | N.D | 0.21 | N.D | N.D | N.D  | N.D  | N.D  | 4.59 |
| 15 | Whole Red<br>Delicious apple<br>w/o seed | Fruits | 81.18 | cluster1 | 3.38 | 0.29 | 2.08 | 0.18 | 0.29 | 0.03 | 0.02 | N.D | 0.26 | N.D | N.D | 0.01 | N.D  | N.D  | 6.54 |
| 16 | Red Delicious<br>apple flesh<br>only     | Fruits | 81.56 | cluster1 | 4.42 | 0.27 | 2.89 | 0.19 | 0.27 | 0.04 | 0.02 | N.D | 0.25 | N.D | N.D | 0.02 | N.D  | N.D  | 8.36 |
| 17 | Whole Granny<br>Smith apple<br>w/o seed  | Fruits | 85.81 | cluster1 | 3.13 | 0.22 | 1.58 | 0.23 | 0.19 | 0.05 | 0.02 | N.D | 0.31 | N.D | N.D | 0.04 | N.D  | N.D  | 5.75 |
| 18 | Granny Smith<br>apple flesh<br>only      | Fruits | 85.88 | cluster1 | 3.20 | 0.30 | 2.45 | 0.29 | 0.21 | 0.06 | 0.02 | N.D | 0.35 | N.D | N.D | 0.03 | N.D  | N.D  | 6.92 |
| 19 | Whole Pazazz<br>apple w/o seed           | Fruits | 85.47 | cluster1 | 2.97 | 0.20 | 3.28 | 0.18 | 0.16 | 0.04 | 0.02 | N.D | 0.20 | N.D | N.D | 0.02 | N.D  | N.D  | 7.07 |
| 20 | Pazazz apple<br>flesh only               | Fruits | 85.74 | cluster1 | 1.96 | 0.16 | 1.16 | 0.13 | 0.13 | 0.05 | 0.01 | N.D | 0.16 | N.D | N.D | N.D  | N.D  | N.D  | 3.76 |
| 21 | Whole Red<br>D'anjou pear<br>w/o seed    | Fruits | 83.62 | cluster1 | 1.83 | 0.18 | 1.64 | 2.07 | 0.39 | 0.02 | 0.03 | N.D | 0.28 | N.D | N.D | 0.01 | N.D  | N.D  | 6.45 |
| 22 | Whole Bartlett<br>pear w/o seed          | Fruits | 80.89 | cluster1 | 1.77 | 0.14 | 1.01 | 0.31 | 0.37 | N.D  | 0.02 | N.D | 0.27 | N.D | N.D | 0.06 | N.D  | N.D  | 3.94 |
| 23 | Whole D'anjou<br>pear w/o seed           | Fruits | 84.39 | cluster1 | 2.09 | 0.10 | 1.80 | 0.25 | 0.18 | 0.02 | 0.02 | N.D | 0.26 | N.D | N.D | 0.00 | N.D  | N.D  | 4.72 |
| 24 | Whole Beurre<br>Bosc pear w/o<br>seed    | Fruits | 85.48 | cluster1 | 1.81 | 0.15 | 4.74 | 1.42 | 0.15 | 0.03 | 0.03 | N.D | 0.27 | N.D | N.D | N.D  | 0.01 | N.D  | 8.61 |
| 25 | Whole Shingo<br>pear w/o seed            | Fruits | 82.45 | cluster1 | 3.78 | 0.10 | 2.53 | 0.16 | 0.25 | 0.02 | 0.02 | N.D | 0.25 | N.D | N.D | 0.00 | N.D  | N.D  | 7.10 |
| 26 | Whole<br>interspecific<br>aprium         | Fruits | 87.93 | cluster1 | 3.24 | 0.11 | 0.99 | 0.08 | 0.16 | 0.02 | 0.02 | N.D | 0.22 | N.D | N.D | 0.01 | N.D  | N.D  | 4.86 |
| 27 | Whole apricot                            | Fruits | 86.15 | cluster1 | 3.13 | 0.17 | 0.78 | 0.14 | 0.21 | 0.03 | 0.02 | N.D | 0.29 | N.D | N.D | 0.01 | N.D  | N.D  | 4.79 |
| 28 | Whole black<br>plum                      | Fruits | 84.48 | cluster1 | 3.61 | 0.37 | 1.45 | 0.09 | 0.19 | 0.02 | 0.02 | N.D | 0.31 | N.D | N.D | N.D  | N.D  | 0.01 | 6.07 |

|    |                                         |        |       |          |      |      |      |      |      |      |      |     |      |     |     |      |     |      |      |
|----|-----------------------------------------|--------|-------|----------|------|------|------|------|------|------|------|-----|------|-----|-----|------|-----|------|------|
| 29 | Whole red plum                          | Fruits | 82.91 | cluster1 | 4.78 | 0.48 | 1.41 | 0.12 | 0.19 | 0.03 | 0.03 | N.D | 0.27 | N.D | N.D | 0.03 | N.D | N.D  | 7.33 |
| 30 | Whole flavor gator pluot                | Fruits | 86.21 | cluster1 | 3.86 | 0.34 | 1.11 | 0.09 | 0.16 | 0.02 | 0.02 | N.D | 0.18 | N.D | N.D | 0.01 | N.D | N.D  | 5.79 |
| 31 | Whole black plum (HGO farms)            | Fruits | 84.11 | cluster1 | 3.53 | 0.38 | 1.20 | 0.12 | 0.21 | 0.03 | 0.02 | N.D | 0.35 | N.D | N.D | 0.03 | N.D | N.D  | 5.87 |
| 32 | Whole Plumogranate pluot                | Fruits | 87.34 | cluster1 | 3.46 | 0.25 | 0.70 | 0.11 | 0.15 | 0.02 | 0.02 | N.D | 0.22 | N.D | N.D | 0.01 | N.D | N.D  | 4.94 |
| 33 | Whole white nectarine (HGO Farms)       | Fruits | 85.64 | cluster1 | 4.50 | 0.22 | 1.75 | 0.15 | 0.29 | 0.04 | 0.02 | N.D | 0.30 | N.D | N.D | 0.01 | N.D | N.D  | 7.28 |
| 34 | Whole white saturn peach                | Fruits | 84.44 | cluster1 | 5.83 | 0.18 | 1.93 | 0.12 | 0.27 | 0.03 | 0.02 | N.D | 0.33 | N.D | N.D | 0.01 | N.D | N.D  | 8.71 |
| 35 | Whole white peach                       | Fruits | 86.14 | cluster1 | 4.91 | 0.15 | 1.57 | 0.07 | 0.26 | 0.02 | 0.02 | N.D | 0.32 | N.D | N.D | 0.02 | N.D | N.D  | 7.34 |
| 36 | Whole yellow nectarine                  | Fruits | 83.41 | cluster1 | 4.69 | 0.17 | 1.32 | 0.08 | 0.27 | 0.02 | 0.02 | N.D | 0.33 | N.D | N.D | 0.01 | N.D | 0.01 | 6.91 |
| 37 | Whole yellow peach (Prima Farms)        | Fruits | 90.25 | cluster1 | 2.98 | 0.14 | 1.28 | 0.11 | 0.14 | 0.02 | 0.01 | N.D | 0.21 | N.D | N.D | 0.01 | N.D | 0.01 | 4.91 |
| 38 | Whole yellow nectarine (overripe)       | Fruits | 87.35 | cluster1 | 4.47 | 0.16 | 1.95 | 0.10 | 0.20 | 0.02 | 0.02 | N.D | 0.34 | N.D | N.D | 0.00 | N.D | 0.01 | 7.27 |
| 39 | Yellow nectarine flesh only             | Fruits | 88.96 | cluster1 | 3.89 | 0.11 | 1.69 | 0.09 | 0.14 | 0.02 | 0.01 | N.D | 0.25 | N.D | N.D | 0.01 | N.D | 0.00 | 6.20 |
| 40 | Whole yellow peach (HGO Farms)          | Fruits | 83.89 | cluster1 | 5.65 | 0.21 | 2.26 | 0.10 | 0.24 | 0.04 | 0.02 | N.D | 0.29 | N.D | N.D | 0.01 | N.D | 0.01 | 8.81 |
| 41 | Whole white nectarine (Summeripe)       | Fruits | 86.29 | cluster1 | 5.22 | 0.14 | 2.32 | 0.06 | 0.20 | 0.02 | 0.01 | N.D | 0.26 | N.D | N.D | 0.01 | N.D | 0.00 | 8.24 |
| 42 | Pureed whole golden dell apple w/o seed | Fruits | 85.27 | cluster1 | 2.32 | 0.18 | 1.88 | 0.13 | 0.22 | 0.06 | 0.02 | N.D | 0.27 | N.D | N.D | 0.03 | N.D | N.D  | 5.10 |

|    |                                              |                |       |          |      |      |      |      |      |      |      |     |      |     |     |      |      |      |       |
|----|----------------------------------------------|----------------|-------|----------|------|------|------|------|------|------|------|-----|------|-----|-----|------|------|------|-------|
| 43 | Pureed whole<br>bartlett pear<br>w/o seed    | Fruits         | 80.75 | cluster1 | 2.25 | 0.19 | 2.41 | 0.59 | 0.49 | 0.04 | 0.03 | N.D | 0.29 | N.D | N.D | 0.05 | N.D  | N.D  | 6.32  |
| 44 | Pureed whole<br>honeycrisp<br>apple w/o seed | Fruits         | 88.13 | cluster1 | 2.74 | 0.17 | 2.05 | 0.12 | 0.20 | 0.05 | 0.02 | N.D | 0.27 | N.D | N.D | 0.03 | N.D  | N.D  | 5.64  |
| 45 | Red mango                                    | Fruits         | 88.50 | cluster1 | 1.69 | 0.14 | 0.64 | 0.13 | 0.22 | 0.05 | 0.01 | N.D | 0.23 | N.D | N.D | 0.00 | N.D  | N.D  | 3.12  |
| 46 | Hass (large)<br>avocado                      | Fruits         | 56.52 | cluster1 | 0.92 | 0.18 | 1.35 | 0.17 | 0.51 | N.D  | 0.06 | N.D | 1.23 | N.D | N.D | 0.01 | N.D  | N.D  | 4.43  |
| 47 | Hass (small)<br>avocado                      | Fruits         | 73.00 | cluster1 | 0.39 | 0.17 | 0.60 | 0.16 | 0.43 | N.D  | 0.05 | N.D | 0.92 | N.D | N.D | 0.03 | N.D  | N.D  | 2.75  |
| 48 | Whole Green<br>house (large)<br>tomato       | Vegetable<br>s | 93.96 | cluster1 | 1.60 | 0.06 | 0.86 | 0.02 | 0.03 | 0.00 | 0.01 | N.D | 0.22 | N.D | N.D | 0.07 | N.D  | N.D  | 2.88  |
| 49 | Whole Glorys<br>tomato                       | Vegetable<br>s | 91.48 | cluster1 | 1.84 | 0.14 | 0.74 | 0.08 | 0.07 | 0.00 | 0.01 | N.D | 0.26 | N.D | N.D | 0.01 | N.D  | N.D  | 3.17  |
| 50 | Whole Twilight<br>tomato                     | Vegetable<br>s | 89.19 | cluster1 | 2.49 | 0.16 | 0.71 | 0.11 | 0.10 | 0.01 | 0.01 | N.D | 0.29 | N.D | N.D | 0.04 | N.D  | N.D  | 3.93  |
| 51 | Whole Comets<br>tomato                       | Vegetable<br>s | 91.15 | cluster1 | 2.06 | 0.21 | 0.69 | 0.10 | 0.11 | 0.01 | 0.01 | N.D | 0.22 | N.D | N.D | 0.18 | N.D  | N.D  | 3.60  |
| 52 | Whole Cherubs<br>tomato                      | Vegetable<br>s | 89.46 | cluster1 | 2.72 | 0.28 | 1.00 | 0.16 | 0.16 | 0.01 | 0.02 | N.D | 0.30 | N.D | N.D | 0.14 | N.D  | N.D  | 4.78  |
| 53 | Whole<br>blueberry                           | Fruits         | 84.89 | cluster1 | 4.75 | 0.21 | 0.71 | 0.25 | 0.09 | 0.04 | 0.01 | N.D | 0.20 | N.D | N.D | N.D  | N.D  | N.D  | 6.27  |
| 54 | Whole<br>raspberry                           | Fruits         | 82.65 | cluster1 | 5.31 | 0.22 | 4.54 | 0.17 | 0.14 | 0.02 | 0.02 | N.D | 0.22 | N.D | N.D | 0.03 | 0.01 | N.D  | 10.70 |
| 55 | Whole<br>blackberry                          | Fruits         | 84.74 | cluster1 | 3.98 | 0.25 | 1.48 | 0.15 | 0.33 | 0.04 | 0.03 | N.D | 0.43 | N.D | N.D | 0.05 | N.D  | N.D  | 6.74  |
| 56 | Whole<br>strawberry                          | Fruits         | 87.50 | cluster1 | 3.15 | 0.14 | 0.43 | 0.10 | 0.10 | 0.06 | 0.02 | N.D | 0.24 | N.D | N.D | 0.00 | N.D  | 0.01 | 4.25  |
| 57 | Whole<br>goldenberry                         | Fruits         | 79.02 | cluster1 | 5.06 | 0.16 | 1.76 | 0.08 | 0.14 | 0.01 | 0.02 | N.D | 0.23 | N.D | N.D | 0.02 | N.D  | N.D  | 7.48  |
| 58 | Whole sweet<br>cherry                        | Fruits         | 78.89 | cluster1 | 6.71 | 0.16 | 4.24 | 0.07 | 0.20 | 0.01 | 0.08 | N.D | 0.19 | N.D | N.D | N.D  | 0.01 | N.D  | 11.66 |
| 59 | Whole guava                                  | Fruits         | 77.81 | cluster1 | 3.02 | 0.51 | 1.43 | 3.05 | 1.07 | 0.07 | 0.07 | N.D | 0.58 | N.D | N.D | 0.05 | N.D  | N.D  | 9.85  |
| 60 | Navel orange                                 | Fruits         | 87.27 | cluster1 | 3.86 | 0.22 | 1.60 | 0.07 | 0.15 | 0.02 | 0.04 | N.D | 0.36 | N.D | N.D | N.D  | N.D  | N.D  | 6.32  |

|    |                              |            |       |          |      |      |      |      |      |      |      |     |      |     |     |      |      |      |       |
|----|------------------------------|------------|-------|----------|------|------|------|------|------|------|------|-----|------|-----|-----|------|------|------|-------|
| 61 | Valencia orange              | Fruits     | 85.61 | cluster1 | 3.78 | 0.27 | 1.36 | 0.06 | 0.30 | 0.02 | 0.06 | N.D | 0.74 | N.D | N.D | 0.03 | N.D  | N.D  | 6.63  |
| 62 | Deep red grapefruit          | Fruits     | 87.92 | cluster1 | 3.71 | 0.18 | 0.89 | 0.08 | 0.10 | 0.02 | 0.04 | N.D | 0.37 | N.D | N.D | 0.01 | N.D  | N.D  | 5.41  |
| 63 | Kiwi                         | Fruits     | 85.64 | cluster1 | 3.40 | 0.59 | 1.68 | 0.29 | 0.12 | 0.03 | 0.03 | N.D | 0.46 | N.D | N.D | 0.05 | N.D  | N.D  | 6.63  |
| 64 | Cantaloupe melon             | Fruits     | 88.78 | cluster1 | 1.66 | 0.12 | 0.69 | 0.03 | 0.06 | 0.01 | 0.01 | N.D | 0.19 | N.D | N.D | 0.01 | N.D  | N.D  | 2.77  |
| 65 | Honeydew melon               | Fruits     | 92.11 | cluster1 | 2.47 | 0.10 | 0.96 | 0.05 | 0.03 | 0.01 | 0.01 | N.D | 0.12 | N.D | N.D | 0.00 | N.D  | N.D  | 3.74  |
| 66 | Seedless watermelon          | Fruits     | 91.25 | cluster1 | 2.50 | 0.09 | 2.70 | 0.05 | 0.03 | 0.01 | 0.00 | N.D | 0.09 | N.D | N.D | N.D  | 0.00 | N.D  | 5.47  |
| 67 | Gold (golden) pineapple      | Fruits     | 81.35 | cluster1 | 6.31 | 0.18 | 0.99 | 0.21 | 0.17 | 0.05 | 0.00 | N.D | 0.03 | N.D | N.D | 0.00 | N.D  | N.D  | 7.94  |
| 68 | Tai nung papaya              | Fruits     | 86.98 | cluster1 | 4.67 | 0.15 | 1.26 | 0.13 | 0.03 | 0.03 | 0.02 | N.D | 0.56 | N.D | N.D | 0.03 | N.D  | N.D  | 6.90  |
| 69 | Mexican maradol papaya       | Fruits     | 86.47 | cluster1 | 4.23 | 0.12 | 1.37 | 0.10 | 0.04 | 0.02 | 0.02 | N.D | 0.50 | N.D | N.D | N.D  | N.D  | N.D  | 6.38  |
| 70 | Red seedless grape           | Fruits     | 83.99 | cluster1 | 5.68 | 0.17 | 4.11 | 0.10 | 0.07 | 0.02 | 0.01 | N.D | 0.17 | N.D | N.D | 0.00 | 0.01 | N.D  | 10.34 |
| 71 | Pureed red seedless grape    | Fruits     | 86.57 | cluster1 | 5.02 | 0.17 | 1.45 | 0.09 | 0.09 | 0.02 | 0.02 | N.D | 0.24 | N.D | N.D | 0.03 | N.D  | N.D  | 7.12  |
| 72 | Pureed green seedless grape  | Fruits     | 81.37 | cluster1 | 5.96 | 0.14 | 2.19 | 0.08 | 0.11 | 0.02 | 0.02 | N.D | 0.20 | N.D | N.D | 0.05 | N.D  | N.D  | 8.77  |
| 73 | Jicama                       | Vegetables | 91.17 | cluster1 | 4.64 | 0.09 | 0.57 | 0.02 | 0.07 | 0.01 | 0.01 | N.D | 0.19 | N.D | N.D | N.D  | N.D  | N.D  | 5.60  |
| 74 | Peeled, steamed beetroot     | Vegetables | 85.43 | cluster1 | 4.04 | 0.25 | 0.38 | 0.03 | 0.45 | 0.05 | 0.03 | N.D | 0.19 | N.D | N.D | 0.01 | N.D  | 0.00 | 5.45  |
| 75 | Bunch beetroot flesh         | Vegetables | 85.40 | cluster1 | 3.95 | 0.20 | 0.37 | 0.02 | 0.50 | 0.05 | 0.02 | N.D | 0.11 | N.D | N.D | N.D  | N.D  | 0.01 | 5.22  |
| 76 | Bunch Steamed beetroot flesh | Vegetables | 84.91 | cluster1 | 4.05 | 0.23 | 0.38 | 0.05 | 0.55 | 0.04 | 0.03 | N.D | 0.16 | N.D | N.D | 0.01 | N.D  | 0.01 | 5.50  |
| 77 | Steamed Loose beetroot flesh | Vegetables | 87.27 | cluster1 | 2.96 | 0.24 | 0.27 | 0.11 | 0.53 | 0.03 | 0.04 | N.D | 0.22 | N.D | N.D | 0.03 | N.D  | 0.00 | 4.43  |

|    |                                                       |            |       |          |      |      |      |      |      |      |      |     |      |     |     |      |     |      |      |
|----|-------------------------------------------------------|------------|-------|----------|------|------|------|------|------|------|------|-----|------|-----|-----|------|-----|------|------|
| 78 | Steamed Kale leaves (Organics)                        | Vegetables | 87.72 | cluster1 | 0.91 | 0.52 | N.D  | 0.41 | 0.33 | 0.07 | 0.07 | N.D | 0.63 | N.D | N.D | 0.18 | N.D | 0.02 | 3.15 |
| 79 | Steamed Kale leaves (Ratto Bros)                      | Vegetables | 86.61 | cluster1 | 1.60 | 0.81 | 0.29 | 0.73 | 0.76 | 0.12 | 0.10 | N.D | 1.03 | N.D | N.D | 0.24 | N.D | N.D  | 5.66 |
| 80 | Steamed Lacinato Kale leaves and stalk (Ratto Bros)   | Vegetables | 84.24 | cluster1 | 0.88 | 0.51 | N.D  | 0.18 | 0.52 | 0.05 | 0.10 | N.D | 0.74 | N.D | N.D | 0.13 | N.D | 0.03 | 3.14 |
| 81 | Steamed Lacinato Kale leaves and stalk (Cal-Organics) | Vegetables | 83.46 | cluster1 | 1.43 | 0.90 | N.D  | 0.43 | 0.64 | 0.08 | 0.09 | N.D | 0.76 | N.D | N.D | 0.26 | N.D | 0.04 | 4.62 |
| 82 | Steamed Red chard leaves and stalk (Cal-Organic)      | Vegetables | 88.71 | cluster1 | 0.74 | 0.26 | N.D  | 0.12 | 0.65 | 0.02 | 0.09 | N.D | 0.19 | N.D | N.D | 0.05 | N.D | 0.01 | 2.14 |
| 83 | Steamed Rainbow chard leaves and stalk (Cal-Organic)  | Vegetables | 91.06 | cluster1 | 1.14 | 0.30 | N.D  | 0.12 | 0.39 | 0.02 | 0.06 | N.D | 0.16 | N.D | N.D | 0.05 | N.D | 0.01 | 2.24 |
| 84 | Steamed Green chard leaves and stalk (Cal-Organic)    | Vegetables | 86.87 | cluster1 | 0.98 | 0.47 | N.D  | 0.36 | 0.85 | 0.04 | 0.09 | N.D | 0.25 | N.D | N.D | 0.02 | N.D | 0.02 | 3.08 |
| 85 | Steamed Red Chard leaves and stalk (Ratto Bros)       | Vegetables | 86.10 | cluster1 | 1.17 | 0.35 | N.D  | 0.24 | 0.79 | 0.02 | 0.07 | N.D | 0.21 | N.D | N.D | 0.06 | N.D | 0.03 | 2.92 |
| 86 | Steamed Red kale leaves and stalk                     | Vegetables | 88.26 | cluster1 | 0.34 | 0.42 | N.D  | 0.33 | 0.32 | 0.06 | 0.06 | N.D | 0.65 | N.D | N.D | 0.08 | N.D | 0.04 | 2.30 |

|    |                                                   |                             |       |          |      |      |      |      |      |      |      |     |      |     |     |      |     |      |      |
|----|---------------------------------------------------|-----------------------------|-------|----------|------|------|------|------|------|------|------|-----|------|-----|-----|------|-----|------|------|
| 87 | Steamed<br>Collard greens<br>leaves and<br>stalk  | Vegetable<br>s              | 87.70 | cluster1 | 0.45 | 0.42 | 0.04 | 0.26 | 0.36 | 0.04 | 0.05 | N.D | 0.51 | N.D | N.D | 0.05 | N.D | 0.03 | 2.20 |
| 88 | Steamed<br>Collard greens<br>leaves               | Vegetable<br>s              | 89.48 | cluster1 | 0.35 | 0.38 | 0.10 | 0.27 | 0.29 | 0.04 | 0.05 | N.D | 0.43 | N.D | N.D | 0.05 | N.D | 0.02 | 1.99 |
| 89 | Steamed<br>Curely mustard<br>greens               | Vegetable<br>s              | 89.29 | cluster1 | 0.58 | 0.39 | 0.10 | 0.39 | 0.32 | 0.05 | 0.06 | N.D | 0.51 | N.D | N.D | 0.05 | N.D | 0.03 | 2.47 |
| 90 | Steamed<br>Spinach leaves                         | Vegetable<br>s              | 92.30 | cluster1 | 0.11 | 0.24 | N.D  | 0.09 | 0.17 | 0.01 | 0.03 | N.D | 0.14 | N.D | N.D | 0.00 | N.D | 0.03 | 0.82 |
| 91 | Steamed Baby<br>Bok Choy<br>leaves and<br>stalk   | Vegetable<br>s              | 94.47 | cluster1 | 0.55 | 0.11 | 0.11 | 0.11 | 0.06 | 0.02 | 0.03 | N.D | 0.28 | N.D | N.D | 0.02 | N.D | 0.01 | 1.30 |
| 92 | Steamed<br>Iceberg lettuce                        | Vegetable<br>s              | 94.96 | cluster1 | 0.60 | 0.11 | N.D  | 0.13 | 0.04 | 0.02 | 0.02 | N.D | 0.17 | N.D | N.D | 0.02 | N.D | 0.01 | 1.12 |
| 93 | Spinach leaves                                    | Vegetable<br>s              | 91.41 | cluster1 | 0.00 | 0.13 | N.D  | 0.05 | 0.14 | 0.02 | 0.04 | N.D | 0.16 | N.D | N.D | 0.02 | N.D | 0.01 | 0.55 |
| 94 | Steamed<br>Whole brussel<br>sprouts               | Vegetable<br>s              | 80.70 | cluster1 | 4.49 | 0.63 | 0.36 | 0.34 | 0.85 | 0.09 | 0.07 | N.D | 0.68 | N.D | N.D | 0.11 | N.D | 0.02 | 7.64 |
| 95 | Steamed<br>Crown broccoli<br>florets and<br>stalk | Vegetable<br>s              | 89.62 | cluster1 | 0.94 | 0.33 | N.D  | 0.16 | 0.37 | 0.04 | 0.04 | N.D | 0.31 | N.D | N.D | 0.06 | N.D | 0.04 | 2.30 |
| 96 | Steamed<br>Cauliflower<br>florets and<br>stalk    | Vegetable<br>s              | 91.57 | cluster1 | 0.91 | 0.20 | N.D  | 0.09 | 0.26 | 0.03 | 0.03 | N.D | 0.19 | N.D | N.D | 0.03 | N.D | 0.02 | 1.76 |
| 97 | Steamed Celery<br>stalk                           | Vegetable<br>s              | 95.17 | cluster1 | 0.66 | 0.15 | N.D  | 0.10 | 0.11 | 0.02 | 0.02 | N.D | 0.18 | N.D | N.D | 0.03 | N.D | 0.00 | 1.27 |
| 98 | Steamed whole<br>snow peas                        | Beans,<br>Peas,<br>Legumes, | 85.59 | cluster1 | 5.45 | 0.44 | 0.42 | 0.23 | 0.25 | 0.03 | 0.03 | N.D | 0.32 | N.D | N.D | 0.00 | N.D | 0.02 | 7.20 |

|     |                                                     |                                               |       |          |      |      |      |      |      |      |      |     |      |     |     |      |     |      |      |
|-----|-----------------------------------------------------|-----------------------------------------------|-------|----------|------|------|------|------|------|------|------|-----|------|-----|-----|------|-----|------|------|
|     |                                                     | Nuts,<br>Seeds                                |       |          |      |      |      |      |      |      |      |     |      |     |     |      |     |      |      |
| 99  | Whole snow<br>peas                                  | Beans,<br>Peas,<br>Legumes,<br>Nuts,<br>Seeds | 84.92 | cluster1 | 5.61 | 0.40 | 0.29 | 0.06 | 0.24 | 0.01 | 0.03 | N.D | 0.32 | N.D | N.D | N.D  | N.D | 0.02 | 6.98 |
| 100 | Steamed Green<br>beans                              | Vegetable<br>s                                | 88.54 | cluster1 | 2.56 | 0.49 | N.D  | 0.31 | 0.27 | 0.05 | 0.04 | N.D | 0.49 | N.D | N.D | 0.20 | N.D | 0.03 | 4.44 |
| 101 | Steamed<br>French green<br>beans                    | Vegetable<br>s                                | 92.61 | cluster1 | 0.76 | 0.38 | N.D  | 0.17 | 0.16 | 0.05 | 0.03 | N.D | 0.33 | N.D | N.D | 0.07 | N.D | 0.02 | 1.96 |
| 102 | Steamed Sugar<br>snap pea                           | Beans,<br>Peas,<br>Legumes,<br>Nuts,<br>Seeds | 85.60 | cluster1 | 3.70 | 0.46 | N.D  | 0.12 | 0.26 | 0.03 | 0.04 | N.D | 0.36 | N.D | N.D | 0.02 | N.D | 0.03 | 5.01 |
| 103 | Steamed<br>peeled baby<br>carrot                    | Vegetable<br>s                                | 89.49 | cluster1 | 2.58 | 0.38 | 0.25 | 0.05 | 0.23 | 0.04 | 0.04 | N.D | 0.43 | N.D | N.D | 0.05 | N.D | 0.00 | 4.06 |
| 104 | Peeled baby<br>carrot                               | Vegetable<br>s                                | 89.75 | cluster1 | 2.21 | 0.30 | 0.03 | 0.08 | 0.24 | 0.02 | 0.04 | N.D | 0.36 | N.D | N.D | 0.04 | N.D | 0.01 | 3.34 |
| 105 | Steamed<br>peeled white<br>rainbow baby<br>carrots  | Vegetable<br>s                                | 90.11 | cluster1 | 2.52 | 0.36 | 0.33 | 0.08 | 0.32 | 0.02 | 0.04 | N.D | 0.46 | N.D | N.D | 0.04 | N.D | 0.01 | 4.17 |
| 106 | Steamed<br>peeled yellow<br>rainbow baby<br>carrots | Vegetable<br>s                                | 88.86 | cluster1 | 3.62 | 0.43 | 0.26 | 0.07 | 0.28 | 0.05 | 0.04 | N.D | 0.52 | N.D | N.D | 0.04 | N.D | 0.01 | 5.33 |
| 107 | Steamed<br>peeled purple<br>rainbow baby<br>carrots | Vegetable<br>s                                | 88.38 | cluster1 | 3.79 | 0.44 | 0.80 | 0.09 | 0.26 | 0.02 | 0.04 | N.D | 0.44 | N.D | N.D | 0.05 | N.D | 0.00 | 5.93 |
| 108 | Steamed whole<br>carrots                            | Vegetable<br>s                                | 87.11 | cluster1 | 3.32 | 0.59 | 0.34 | 0.05 | 0.32 | 0.04 | 0.04 | N.D | 0.53 | N.D | N.D | 0.07 | N.D | 0.01 | 5.30 |



|     |                                                    |                |       |          |      |      |      |      |      |      |      |     |      |     |     |      |     |      |      |
|-----|----------------------------------------------------|----------------|-------|----------|------|------|------|------|------|------|------|-----|------|-----|-----|------|-----|------|------|
| 109 | Steamed carrot<br>flesh only                       | Vegetable<br>s | 87.53 | cluster1 | 1.56 | 0.52 | 0.70 | 0.08 | 0.31 | 0.02 | 0.04 | N.D | 0.44 | N.D | N.D | 0.02 | N.D | 0.01 | 3.70 |
| 110 | Steamed whole<br>green bell<br>pepper w/o<br>seed  | Vegetable<br>s | 93.57 | cluster1 | 1.34 | 0.18 | 0.07 | 0.06 | 0.06 | 0.03 | 0.02 | N.D | 0.25 | N.D | N.D | 0.01 | N.D | 0.00 | 2.01 |
| 111 | Steamed whole<br>red bell pepper<br>w/o seed       | Vegetable<br>s | 92.42 | cluster1 | 1.65 | 0.04 | 0.05 | 0.01 | 0.02 | 0.03 | 0.02 | N.D | 0.24 | N.D | N.D | N.D  | N.D | 0.00 | 2.07 |
| 112 | Steamed whole<br>yellow bell<br>pepper w/o<br>seed | Vegetable<br>s | 91.15 | cluster1 | 1.97 | 0.05 | 0.15 | 0.02 | 0.03 | 0.03 | 0.02 | N.D | 0.22 | N.D | N.D | N.D  | N.D | 0.00 | 2.49 |
| 113 | Steamed whole<br>orange bell<br>pepper w/o<br>seed | Vegetable<br>s | 91.00 | cluster1 | 2.38 | 0.06 | 0.14 | 0.02 | 0.03 | 0.03 | 0.02 | N.D | 0.24 | N.D | N.D | 0.01 | N.D | 0.00 | 2.94 |
| 114 | Steamed<br>butternut<br>squash                     | Vegetable<br>s | 89.61 | cluster1 | 3.44 | 0.28 | 0.63 | 0.05 | 0.04 | 0.01 | 0.02 | N.D | 0.30 | N.D | N.D | 0.04 | N.D | 0.01 | 4.81 |
| 115 | Pureed<br>butternut<br>squash                      | Vegetable<br>s | 89.33 | cluster1 | 3.13 | 0.30 | 0.13 | 0.06 | 0.04 | 0.03 | 0.02 | N.D | 0.30 | N.D | N.D | 0.06 | N.D | 0.01 | 4.08 |
| 116 | Steamed<br>spaghetti<br>squash                     | Vegetable<br>s | 92.97 | cluster1 | 1.72 | 0.15 | 0.11 | 0.06 | 0.03 | 0.02 | 0.02 | N.D | 0.25 | N.D | N.D | 0.04 | N.D | 0.01 | 2.42 |
| 117 | Steamed<br>yellow neck<br>squash                   | Vegetable<br>s | 92.77 | cluster1 | 1.75 | 0.25 | N.D  | 0.08 | 0.08 | 0.02 | 0.02 | N.D | 0.16 | N.D | N.D | 0.02 | N.D | 0.01 | 2.39 |
| 118 | Steamed green<br>zucchini                          | Vegetable<br>s | 93.80 | cluster1 | 0.84 | 0.12 | N.D  | 0.07 | 0.06 | 0.02 | 0.01 | N.D | 0.14 | N.D | N.D | 0.02 | N.D | 0.02 | 1.29 |
| 119 | Steamed<br>mexican<br>squash                       | Vegetable<br>s | 93.46 | cluster1 | 1.10 | 0.19 | N.D  | 0.08 | 0.08 | 0.02 | 0.02 | N.D | 0.15 | N.D | N.D | 0.01 | N.D | 0.01 | 1.66 |
| 120 | Steamed whole<br>sweet potato                      | Vegetable<br>s | 81.65 | cluster1 | 6.25 | 0.33 | 1.21 | 0.05 | 0.18 | 0.01 | 0.04 | N.D | 0.48 | N.D | N.D | N.D  | N.D | 0.01 | 8.55 |

|     |                                      |            |       |          |      |      |      |      |      |      |      |      |      |     |     |      |     |      |      |
|-----|--------------------------------------|------------|-------|----------|------|------|------|------|------|------|------|------|------|-----|-----|------|-----|------|------|
| 121 | Steamed sweet potato flesh only      | Vegetables | 82.09 | cluster1 | 5.70 | 0.40 | 0.05 | 0.03 | 0.15 | 0.02 | 0.05 | N.D  | 0.39 | N.D | N.D | N.D  | N.D | 0.01 | 6.81 |
| 122 | Whole baby bella mushrooms           | Vegetables | 90.61 | cluster1 | 1.28 | 0.11 | N.D  | 0.07 | 0.01 | 0.02 | 0.00 | 0.01 | N.D  | N.D | N.D | 0.09 | N.D | 0.04 | 1.64 |
| 123 | Steamed whole baby bella mushrooms   | Vegetables | 90.32 | cluster1 | 1.73 | 0.16 | N.D  | 0.08 | 0.01 | 0.03 | 0.00 | 0.02 | N.D  | N.D | N.D | 0.12 | N.D | 0.04 | 2.19 |
| 124 | Steamed whole crimini mushrooms      | Vegetables | 92.24 | cluster1 | 0.66 | 0.09 | N.D  | 0.07 | 0.01 | 0.02 | 0.00 | 0.01 | N.D  | N.D | N.D | 0.05 | N.D | 0.02 | 0.92 |
| 125 | Steamed whole white mushrooms        | Vegetables | 92.07 | cluster1 | 0.93 | 0.13 | N.D  | 0.05 | 0.01 | 0.02 | 0.00 | 0.01 | N.D  | N.D | N.D | 0.07 | N.D | 0.02 | 1.25 |
| 126 | Steamed whole shiitake mushrooms     | Vegetables | 90.18 | cluster1 | 5.76 | 0.20 | N.D  | 0.14 | 0.02 | 0.07 | 0.00 | 0.03 | N.D  | N.D | N.D | 0.43 | N.D | 0.02 | 6.67 |
| 127 | Steamed whole bunapi mushrooms       | Vegetables | 91.07 | cluster1 | 2.81 | 0.14 | N.D  | 0.12 | 0.01 | 0.06 | 0.00 | 0.03 | 0.00 | N.D | N.D | 0.11 | N.D | 0.03 | 3.30 |
| 128 | Steamed whole beech mushrooms        | Vegetables | 87.33 | cluster1 | 2.99 | 0.19 | 0.08 | 0.11 | 0.01 | 0.07 | 0.00 | 0.02 | N.D  | N.D | N.D | 0.08 | N.D | 0.05 | 3.61 |
| 129 | Steamed purple top turnip flesh only | Vegetables | 94.03 | cluster1 | 2.01 | 0.15 | 0.64 | 0.10 | 0.09 | 0.02 | 0.02 | N.D  | 0.23 | N.D | N.D | 0.04 | N.D | 0.01 | 3.31 |
| 130 | Whole English cucumber               | Vegetables | 95.91 | cluster1 | 0.26 | 0.18 | N.D  | 0.14 | 0.04 | 0.02 | 0.01 | N.D  | 0.15 | N.D | N.D | 0.04 | N.D | N.D  | 0.84 |
| 131 | Steamed whole English cucumber       | Vegetables | 95.70 | cluster1 | 0.96 | 0.17 | 0.10 | 0.10 | 0.05 | 0.02 | 0.01 | N.D  | 0.12 | N.D | N.D | 0.02 | N.D | 0.01 | 1.56 |
| 132 | Steamed whole mini cucumbers         | Vegetables | 94.65 | cluster1 | 1.04 | 0.22 | 0.14 | 0.11 | 0.07 | 0.02 | 0.01 | N.D  | 0.13 | N.D | N.D | 0.03 | N.D | 0.01 | 1.78 |

|     |                                   |                                   |       |          |      |      |      |      |      |      |      |      |      |     |     |      |      |      |       |
|-----|-----------------------------------|-----------------------------------|-------|----------|------|------|------|------|------|------|------|------|------|-----|-----|------|------|------|-------|
| 133 | Steamed green cucumber flesh only | Vegetables                        | 95.38 | cluster1 | 1.24 | 0.16 | 0.11 | 0.09 | 0.04 | 0.02 | 0.01 | N.D  | 0.09 | N.D | N.D | 0.02 | N.D  | 0.01 | 1.79  |
| 134 | Steamed whole green cucumber      | Vegetables                        | 95.00 | cluster1 | 0.93 | 0.14 | N.D  | 0.06 | 0.05 | 0.02 | 0.01 | N.D  | 0.11 | N.D | N.D | 0.01 | N.D  | 0.01 | 1.35  |
| 135 | Creamy peanut butter (Skipppy)    | Beans, Peas, Legumes, Nuts, Seeds | 0.50  | cluster1 | 5.84 | 0.22 | 0.27 | 0.25 | 1.83 | 0.08 | 0.05 | 0.01 | 0.13 | N.D | N.D | 0.06 | N.D  | 0.04 | 8.77  |
| 136 | Peanut butter (Laura Scudder's)   | Beans, Peas, Legumes, Nuts, Seeds | 0.06  | cluster1 | 2.87 | 0.32 | 0.06 | 0.20 | 1.52 | 0.11 | 0.04 | 0.00 | 0.13 | N.D | N.D | 0.05 | N.D  | 0.04 | 5.35  |
| 137 | Sesame seed butter (Organics)     | Beans, Peas, Legumes, Nuts, Seeds | 0.26  | cluster1 | 1.61 | 0.52 | N.D  | 0.23 | 0.58 | N.D  | 0.03 | N.D  | 0.11 | N.D | N.D | 1.34 | 0.02 | N.D  | 4.44  |
| 138 | Peanut butter (JIF)               | Beans, Peas, Legumes, Nuts, Seeds | 0.42  | cluster1 | 4.19 | 0.27 | N.D  | 0.42 | 0.98 | 0.05 | 0.06 | N.D  | 0.33 | N.D | N.D | N.D  | 0.02 | N.D  | 6.31  |
| 139 | Almond Butter (Justin's)          | Beans, Peas, Legumes, Nuts, Seeds | 0.66  | cluster1 | 2.59 | 1.22 | N.D  | 1.49 | 4.44 | 0.20 | 0.23 | N.D  | 0.53 | N.D | N.D | 0.09 | N.D  | N.D  | 10.79 |
| 140 | Maple almond Butter (Justin's)    | Beans, Peas, Legumes, Nuts, Seeds | 0.31  | cluster1 | 5.06 | 1.42 | N.D  | 1.31 | 4.81 | 0.18 | 0.25 | N.D  | 0.53 | N.D | N.D | N.D  | 0.04 | N.D  | 13.59 |

|     |                         |                                               |       |          |      |      |      |      |      |      |      |      |      |      |      |      |      |      |      |
|-----|-------------------------|-----------------------------------------------|-------|----------|------|------|------|------|------|------|------|------|------|------|------|------|------|------|------|
| 141 | Soy milk                | Beans,<br>Peas,<br>Legumes,<br>Nuts,<br>Seeds | 89.69 | cluster1 | 1.71 | 0.31 | 0.45 | N.D  | 0.02 | N.D  | 0.00 | N.D  | 0.01 | N.D  | N.D  | 0.02 | N.D  | 0.02 | 2.54 |
| 142 | Almond milk             | Beans,<br>Peas,<br>Legumes,<br>Nuts,<br>Seeds | 85.33 | cluster1 | 0.21 | 0.37 | 0.02 | 0.04 | 0.40 | 0.02 | 0.09 | 0.03 | 0.03 | N.D  | N.D  | 0.13 | N.D  | 0.00 | 1.35 |
| 143 | Mango juice             | Fruits                                        | 87.01 | cluster1 | 3.55 | 0.13 | 2.24 | 0.06 | 0.13 | 0.03 | 0.01 | N.D  | 0.19 | N.D  | N.D  | N.D  | N.D  | 0.00 | 6.35 |
| 144 | Carrot juice            | Vegetables                                    | 93.93 | cluster1 | 2.14 | 0.09 | 0.69 | 0.00 | 0.04 | N.D  | 0.01 | N.D  | 0.10 | N.D  | N.D  | N.D  | N.D  | 0.00 | 3.07 |
| 145 | Beet juice              | Vegetables                                    | 87.58 | cluster1 | 4.64 | 0.02 | 1.85 | 0.00 | 0.03 | N.D  | 0.00 | 0.00 | 0.02 | 0.01 | 0.00 | N.D  | N.D  | 0.01 | 6.58 |
| 146 | Vegetable juice         | Vegetables                                    | 94.04 | cluster1 | 0.95 | 0.11 | 0.05 | 0.09 | 0.04 | N.D  | 0.01 | N.D  | 0.13 | N.D  | N.D  | 0.04 | N.D  | N.D  | 1.42 |
| 147 | Apple juice             | Fruits                                        | 98.26 | cluster1 | 0.41 | 0.00 | 0.32 | 0.01 | 0.01 | N.D  | 0.00 | N.D  | 0.02 | N.D  | N.D  | N.D  | N.D  | 0.00 | 0.77 |
| 148 | Pulp free orange juice  | Fruits                                        | 90.30 | cluster1 | 3.51 | 0.04 | 1.32 | 0.01 | 0.03 | N.D  | 0.01 | 0.00 | 0.03 | 0.01 | 0.00 | N.D  | N.D  | 0.00 | 4.96 |
| 149 | High pulp orange juice  | Fruits                                        | 96.85 | cluster1 | 0.79 | 0.09 | 0.31 | 0.03 | 0.11 | 0.01 | 0.03 | N.D  | 0.21 | N.D  | N.D  | 0.01 | N.D  | 0.00 | 1.59 |
| 150 | Lowfat chocolate milk   | Milk and Milk Products                        | 83.19 | cluster1 | 3.66 | 2.44 | N.D  | 0.00 | 0.01 | N.D  | 0.00 | N.D  | 0.01 | N.D  | N.D  | 0.02 | N.D  | N.D  | 6.14 |
| 151 | Whole milk              | Milk and Milk Products                        | 88.98 | cluster1 | 1.74 | 1.94 | N.D  | 0.00 | 0.00 | N.D  | 0.00 | N.D  | 0.00 | N.D  | N.D  | 0.01 | N.D  | 0.01 | 3.70 |
| 152 | Lactose-free whole milk | Milk and Milk Products                        | 87.64 | cluster1 | 0.64 | 1.40 | N.D  | 0.00 | 0.00 | N.D  | 0.00 | N.D  | 2.04 |
| 153 | Oat milk                | Grain Products                                | 90.92 | cluster1 | 4.49 | N.D  | N.D  | 0.02 | 0.03 | N.D  | 0.00 | N.D  | 0.00 | N.D  | N.D  | 0.02 | N.D  | N.D  | 4.56 |
| 154 | Non fat greek yogurt    | Milk and Milk Products                        | 84.68 | cluster1 | 1.45 | 2.14 | N.D  | 0.00 | 0.00 | 0.00 | 0.02 | N.D  | 0.00 | N.D  | N.D  | 0.00 | 0.02 | N.D  | 3.64 |

|     |                                          |                                   |       |          |      |       |      |      |      |      |      |      |      |     |     |      |      |      |       |
|-----|------------------------------------------|-----------------------------------|-------|----------|------|-------|------|------|------|------|------|------|------|-----|-----|------|------|------|-------|
| 155 | Blueberry greek yogurt                   | Milk and Milk Products            | 79.12 | cluster1 | 4.99 | 1.66  | 1.92 | 0.02 | 0.02 | 0.00 | 0.02 | N.D  | 0.06 | N.D | N.D | 0.02 | 0.01 | N.D  | 8.72  |
| 156 | Cottage cheese                           | Milk and Milk Products            | 76.99 | cluster1 | 1.93 | 2.08  | 0.57 | 0.00 | 0.00 | N.D  | 0.01 | N.D  | N.D  | N.D | N.D | 0.01 | 0.01 | N.D  | 4.61  |
| 157 | Low Moisture part Skim Mozzarella cheese | Milk and Milk Products            | 47.84 | cluster1 | 0.17 | 0.40  | 0.01 | 0.00 | 0.00 | 0.01 | 0.01 | N.D  | N.D  | N.D | N.D | N.D  | N.D  | 0.02 | 0.62  |
| 158 | Sprouted tofu                            | Beans, Peas, Legumes, Nuts, Seeds | 79.47 | cluster1 | 0.25 | 0.31  | N.D  | 0.01 | 0.08 | N.D  | 0.03 | N.D  | 0.05 | N.D | N.D | 0.12 | N.D  | 0.03 | 0.88  |
| 159 | Commercial tofu                          | Beans, Peas, Legumes, Nuts, Seeds | 81.72 | cluster1 | 1.41 | 0.79  | N.D  | 1.17 | 0.64 | 0.06 | 0.11 | N.D  | 0.70 | N.D | N.D | 0.11 | 0.09 | N.D  | 5.08  |
| 160 | Cinnamon Almond Butter                   | Beans, Peas, Legumes, Nuts, Seeds | 0.25  | cluster1 | 4.53 | 1.51  | N.D  | 2.05 | 5.76 | 0.22 | 0.31 | N.D  | 0.66 | N.D | N.D | 0.04 | 0.03 | N.D  | 15.10 |
| 161 | Almond flour                             | Beans, Peas, Legumes, Nuts, Seeds | 4.53  | cluster1 | 1.65 | 0.46  | 0.11 | 0.36 | 2.89 | 0.10 | 0.07 | N.D  | 0.18 | N.D | N.D | 0.06 | N.D  | 0.03 | 5.92  |
| 162 | Hazelnut flour                           | Beans, Peas, Legumes, Nuts, Seeds | 0.02  | cluster1 | 2.90 | 0.54  | 0.26 | 0.19 | 1.67 | 0.09 | 0.07 | 0.01 | 0.13 | N.D | N.D | 0.04 | N.D  | 0.04 | 5.93  |
| 163 | Soy flour                                | Beans, Peas,                      | 6.89  | cluster1 | 1.97 | 11.55 | N.D  | 1.33 | 3.82 | 0.58 | 0.33 | 0.10 | 0.54 | N.D | N.D | 1.01 | 0.15 | N.D  | 21.38 |

|     |                                                | Legumes,<br>Nuts,<br>Seeds |       |          |      |      |      |      |      |      |      |      |      |      |      |      |      |      |      |
|-----|------------------------------------------------|----------------------------|-------|----------|------|------|------|------|------|------|------|------|------|------|------|------|------|------|------|
| 164 | Canned Artichoke hearts                        | Vegetables                 | 81.41 | cluster1 | 1.51 | 0.42 | 0.55 | 0.12 | 0.40 | 0.03 | 0.06 | 0.00 | 0.53 | N.D  | N.D  | 0.06 | N.D  | 0.03 | 3.72 |
| 165 | Corn polenta                                   | Grain Products             | 81.84 | cluster1 | 6.20 | 0.24 | 2.38 | 0.15 | 0.30 | 0.03 | 0.03 | N.D  | 0.20 | N.D  | N.D  | N.D  | 0.04 | N.D  | 9.57 |
| 166 | Original apple sauce (Tree top)                | Fruits                     | 82.20 | cluster1 | 3.77 | 0.25 | 3.33 | 0.27 | 0.24 | 0.07 | 0.03 | N.D  | 0.42 | N.D  | N.D  | 0.01 | N.D  | 0.00 | 8.39 |
| 167 | No added sugar apple sauce (Tree top)          | Fruits                     | 84.00 | cluster1 | 2.79 | 0.21 | 1.56 | 0.17 | 0.26 | N.D  | 0.02 | N.D  | 0.30 | N.D  | N.D  | 0.02 | N.D  | N.D  | 5.32 |
| 168 | No added sugar apple sauce (Motts)             | Fruits                     | 86.26 | cluster1 | 2.63 | 0.14 | 2.16 | 0.14 | 0.13 | N.D  | 0.01 | N.D  | 0.18 | N.D  | N.D  | 0.00 | N.D  | N.D  | 5.40 |
| 169 | No added sugar mixed berry apple sauce (Motts) | Fruits                     | 85.59 | cluster1 | 2.84 | 0.13 | 1.86 | 0.11 | 0.19 | N.D  | 0.01 | N.D  | 0.21 | N.D  | N.D  | 0.02 | N.D  | N.D  | 5.37 |
| 170 | No added sugar strawberry apple sauce (Motts)  | Fruits                     | 84.84 | cluster1 | 3.78 | 0.18 | 2.95 | 0.20 | 0.16 | 0.04 | 0.02 | N.D  | 0.25 | 0.01 | 0.00 | 0.02 | N.D  | 0.01 | 7.63 |
| 171 | Organic Happy Tots 287                         | Fruits                     | 69.22 | cluster1 | 3.64 | 0.26 | 4.41 | 0.23 | 0.55 | 0.01 | 0.04 | 0.02 | 0.43 | N.D  | N.D  | N.D  | N.D  | 0.02 | 9.62 |
| 172 | Organic Happy Tots 288                         | Fruits                     | 81.46 | cluster1 | 5.04 | 0.42 | 2.17 | 1.29 | 0.33 | N.D  | 0.03 | N.D  | 0.30 | N.D  | N.D  | 0.02 | N.D  | N.D  | 9.59 |
| 173 | Organic Happy Tots 289                         | Fruits                     | 82.09 | cluster1 | 2.79 | 0.26 | 1.83 | 0.22 | 0.44 | N.D  | 0.02 | N.D  | 0.26 | N.D  | N.D  | 0.02 | N.D  | N.D  | 5.84 |
| 174 | Organic Happy Tots 290                         | Fruits                     | 82.13 | cluster1 | 2.58 | 0.30 | 1.72 | 0.28 | 0.47 | N.D  | 0.03 | N.D  | 0.39 | N.D  | N.D  | 0.02 | N.D  | N.D  | 5.81 |
| 175 | Organic Happy Tots 291                         | Fruits                     | 79.68 | cluster1 | 1.85 | 0.19 | 1.78 | 0.12 | 0.39 | N.D  | 0.02 | N.D  | 0.35 | N.D  | N.D  | N.D  | N.D  | N.D  | 4.70 |

|     |                        |            |       |          |      |      |      |      |      |      |      |      |      |      |      |      |      |      |       |
|-----|------------------------|------------|-------|----------|------|------|------|------|------|------|------|------|------|------|------|------|------|------|-------|
| 176 | Organic Happy Tots 292 | Fruits     | 95.57 | cluster1 | 0.58 | 0.06 | 0.38 | 0.03 | 0.10 | N.D  | 0.01 | N.D  | 0.10 | N.D  | N.D  | 0.00 | N.D  | N.D  | 1.26  |
| 177 | Organic Happy Baby 294 | Fruits     | 83.71 | cluster1 | 2.07 | 0.10 | 0.77 | 0.08 | 0.22 | 0.06 | 0.02 | 0.00 | 0.33 | N.D  | N.D  | 0.02 | N.D  | 0.00 | 3.67  |
| 178 | Organic Happy Baby 295 | Fruits     | 84.05 | cluster1 | 3.49 | 0.16 | 2.17 | 0.29 | 0.19 | 0.05 | 0.03 | N.D  | 0.30 | 0.01 | 0.01 | 0.01 | N.D  | 0.01 | 6.72  |
| 179 | Organic Happy Baby 296 | Fruits     | 84.52 | cluster1 | 4.55 | 0.35 | 1.95 | 0.09 | 0.14 | N.D  | 0.02 | N.D  | 0.27 | N.D  | N.D  | 0.03 | N.D  | N.D  | 7.40  |
| 180 | Organic Happy Baby 297 | Fruits     | 80.64 | cluster1 | 2.62 | 0.07 | 0.76 | 0.27 | 0.14 | 0.06 | 0.02 | N.D  | 0.14 | N.D  | N.D  | N.D  | N.D  | 0.01 | 4.08  |
| 181 | Organic Happy Baby 299 | Fruits     | 86.18 | cluster1 | 2.91 | 0.16 | 2.55 | 0.14 | 0.16 | N.D  | 0.02 | N.D  | 0.26 | N.D  | N.D  | 0.01 | N.D  | N.D  | 6.21  |
| 182 | Organic Happy Baby 300 | Fruits     | 84.55 | cluster1 | 1.65 | 0.24 | 0.67 | 0.65 | 0.40 | 0.07 | 0.04 | N.D  | 0.40 | 0.01 | 0.00 | 0.02 | N.D  | 0.01 | 4.17  |
| 183 | Organic Happy Baby 303 | Vegetables | 87.68 | cluster1 | 5.84 | 0.25 | 2.62 | 0.22 | 0.19 | 0.02 | 0.02 | N.D  | 0.17 | N.D  | N.D  | N.D  | 0.01 | N.D  | 9.33  |
| 184 | Organic Happy Baby 305 | Vegetables | 82.42 | cluster1 | 6.32 | 0.33 | 1.11 | 0.14 | 0.22 | N.D  | 0.02 | N.D  | 0.32 | N.D  | N.D  | 0.08 | N.D  | N.D  | 8.54  |
| 185 | Organic Happy Baby 306 | Fruits     | 82.26 | cluster1 | 4.75 | 0.74 | 3.16 | 0.11 | 0.31 | 0.02 | 0.06 | N.D  | 0.63 | N.D  | N.D  | 0.03 | 0.01 | N.D  | 9.83  |
| 186 | Beach-Nut Naturals 307 | Vegetables | 91.59 | cluster1 | 1.77 | 0.17 | 1.47 | 0.07 | 0.04 | 0.01 | 0.02 | N.D  | 0.26 | N.D  | N.D  | 0.03 | 0.01 | N.D  | 3.84  |
| 187 | Beach-Nut Naturals 308 | Vegetables | 93.69 | cluster1 | 3.43 | 0.13 | 0.74 | 0.04 | 0.06 | 0.00 | 0.02 | N.D  | 0.08 | N.D  | N.D  | N.D  | 0.00 | N.D  | 4.51  |
| 188 | Beach-Nut Naturals 311 | Fruits     | 85.43 | cluster1 | 3.36 | 0.13 | 1.70 | 0.15 | 0.15 | 0.05 | 0.02 | N.D  | 0.26 | N.D  | N.D  | N.D  | N.D  | 0.00 | 5.83  |
| 189 | Beach-Nut Naturals 313 | Fruits     | 86.53 | cluster1 | 5.59 | 0.15 | 3.99 | 0.48 | 0.21 | 0.02 | 0.01 | N.D  | 0.12 | N.D  | N.D  | N.D  | 0.01 | N.D  | 10.58 |
| 190 | Beach-Nut Naturals 314 | Fruits     | 86.07 | cluster1 | 2.92 | 0.19 | 4.55 | 0.16 | 0.16 | 0.03 | 0.02 | N.D  | 0.20 | N.D  | N.D  | 0.03 | 0.00 | N.D  | 8.26  |
| 191 | Beach-Nut Naturals 315 | Vegetables | 93.01 | cluster1 | 2.50 | 0.22 | 0.83 | 0.09 | 0.18 | 0.02 | 0.02 | N.D  | 0.12 | N.D  | N.D  | 0.02 | 0.02 | N.D  | 4.02  |
| 192 | Beach-Nut Naturals 318 | Fruits     | 82.89 | cluster1 | 1.71 | 0.16 | 1.72 | 0.54 | 0.31 | N.D  | 0.03 | N.D  | 0.31 | 0.01 | 0.00 | N.D  | N.D  | 0.01 | 4.80  |
| 193 | Beach-Nut Naturals 319 | Vegetables | 88.98 | cluster1 | 2.40 | 0.33 | 1.32 | 0.09 | 0.17 | 0.01 | 0.03 | N.D  | 0.22 | N.D  | N.D  | N.D  | 0.01 | N.D  | 4.58  |

|     |                           |            |       |          |      |      |      |      |      |      |      |     |      |     |     |      |      |      |       |
|-----|---------------------------|------------|-------|----------|------|------|------|------|------|------|------|-----|------|-----|-----|------|------|------|-------|
| 194 | Beach-Nut<br>Naturals 320 | Fruits     | 81.07 | cluster1 | 5.07 | 0.26 | 1.49 | 0.20 | 0.24 | N.D  | 0.02 | N.D | 0.29 | N.D | N.D | 0.05 | N.D  | N.D  | 7.60  |
| 195 | Beach-Nut<br>Naturals 321 | Vegetables | 89.37 | cluster1 | 4.77 | 0.37 | 0.86 | 0.25 | 0.27 | 0.01 | 0.01 | N.D | 0.11 | N.D | N.D | 0.02 | 0.02 | N.D  | 6.68  |
| 196 | Beach-Nut<br>Organics 323 | Fruits     | 83.37 | cluster1 | 2.92 | 0.22 | 4.56 | 0.20 | 0.18 | 0.04 | 0.02 | N.D | 0.24 | N.D | N.D | 0.01 | 0.01 | N.D  | 8.40  |
| 197 | Beach-Nut 324             | Vegetables | 94.00 | cluster1 | 1.25 | 0.38 | 0.82 | 0.05 | 0.16 | 0.01 | 0.03 | N.D | 0.31 | N.D | N.D | 0.02 | 0.01 | N.D  | 3.05  |
| 198 | Beach-Nut 325             | Fruits     | 82.14 | cluster1 | 4.46 | 0.31 | 2.95 | 0.45 | 0.32 | 0.04 | 0.03 | N.D | 0.34 | N.D | N.D | N.D  | 0.01 | N.D  | 8.92  |
| 199 | Beach-Nut 326             | Fruits     | 84.77 | cluster1 | 4.01 | 0.20 | 6.01 | 0.20 | 0.18 | 0.04 | 0.02 | N.D | 0.23 | N.D | N.D | 0.00 | 0.00 | N.D  | 10.90 |
| 200 | Beach-Nut<br>Naturals 327 | Fruits     | 78.94 | cluster1 | 5.44 | 0.28 | 5.98 | 0.70 | 0.30 | 0.03 | 0.03 | N.D | 0.28 | N.D | N.D | 0.05 | 0.01 | N.D  | 13.10 |
| 201 | Beach-Nut<br>Naturals 328 | Fruits     | 82.19 | cluster1 | 4.79 | 0.24 | 2.64 | 0.33 | 0.24 | N.D  | 0.03 | N.D | 0.37 | N.D | N.D | N.D  | N.D  | 0.01 | 8.66  |
| 202 | Beach-Nut<br>Naturals 329 | Vegetables | 84.30 | cluster1 | 5.23 | 0.17 | 0.90 | 0.05 | 0.06 | N.D  | 0.01 | N.D | 0.21 | N.D | N.D | 0.05 | N.D  | N.D  | 6.69  |
| 203 | Nature's Heart<br>330     | Fruits     | 83.32 | cluster1 | 3.72 | 0.28 | 4.32 | 0.83 | 0.31 | 0.04 | 0.03 | N.D | 0.34 | N.D | N.D | 0.03 | 0.01 | N.D  | 9.91  |
| 204 | Nature's Heart<br>332     | Fruits     | 80.73 | cluster1 | 5.84 | 0.11 | 2.93 | 0.34 | 0.18 | N.D  | 0.02 | N.D | 0.30 | N.D | N.D | 0.01 | N.D  | 0.01 | 9.74  |
| 205 | Nature's Heart<br>333     | Fruits     | 81.75 | cluster1 | 4.06 | 0.25 | 1.90 | 0.42 | 0.20 | N.D  | 0.02 | N.D | 0.34 | N.D | N.D | 0.02 | N.D  | N.D  | 7.21  |
| 206 | Nature's Heart<br>334     | Vegetables | 83.31 | cluster1 | 5.59 | 0.18 | 3.48 | 0.08 | 0.11 | 0.01 | 0.02 | N.D | 0.26 | N.D | N.D | 0.06 | 0.01 | N.D  | 9.81  |
| 207 | Nature's Heart<br>335     | Fruits     | 86.68 | cluster1 | 4.28 | 0.13 | 2.57 | 0.09 | 0.09 | 0.01 | 0.01 | N.D | 0.15 | N.D | N.D | 0.04 | 0.00 | N.D  | 7.37  |
| 208 | Plum Organics<br>336      | Fruits     | 81.17 | cluster1 | 5.53 | 0.18 | 3.20 | 0.08 | 0.32 | N.D  | 0.03 | N.D | 0.45 | N.D | N.D | N.D  | N.D  | 0.01 | 9.80  |
| 209 | Plum Organics<br>340      | Fruits     | 83.39 | cluster1 | 5.80 | 0.26 | 2.55 | 0.44 | 0.26 | 0.03 | 0.02 | N.D | 0.22 | N.D | N.D | N.D  | 0.01 | N.D  | 9.59  |
| 210 | Plum Organics<br>342      | Fruits     | 81.77 | cluster1 | 2.01 | 0.18 | 1.95 | 0.85 | 0.37 | N.D  | 0.02 | N.D | 0.28 | N.D | N.D | N.D  | N.D  | N.D  | 5.65  |
| 211 | Plum Organics<br>343      | Fruits     | 83.96 | cluster1 | 2.26 | 0.29 | 1.32 | 0.83 | 0.30 | N.D  | 0.02 | N.D | 0.30 | N.D | N.D | 0.01 | N.D  | N.D  | 5.33  |
| 212 | Plum Organics<br>344      | Fruits     | 86.16 | cluster1 | 3.01 | 0.30 | 2.47 | 0.15 | 0.19 | 0.03 | 0.03 | N.D | 0.29 | N.D | N.D | N.D  | 0.01 | N.D  | 6.47  |



|     |                    |            |       |          |      |      |      |      |      |      |      |     |      |      |      |      |      |      |      |
|-----|--------------------|------------|-------|----------|------|------|------|------|------|------|------|-----|------|------|------|------|------|------|------|
| 213 | Plum Organics 346  | Vegetables | 87.11 | cluster1 | 5.44 | 0.24 | 0.84 | 0.20 | 0.27 | 0.01 | 0.03 | N.D | 0.12 | N.D  | N.D  | N.D  | 0.02 | N.D  | 7.16 |
| 214 | Plum Organics 349  | Fruits     | 85.54 | cluster1 | 3.87 | 0.49 | 2.11 | 0.30 | 0.23 | 0.02 | 0.02 | N.D | 0.18 | N.D  | N.D  | 0.02 | 0.01 | N.D  | 7.24 |
| 215 | Plum Organics 350  | Fruits     | 82.63 | cluster1 | 6.26 | 0.36 | 1.08 | 0.06 | 0.09 | N.D  | 0.01 | N.D | 0.15 | N.D  | N.D  | 0.03 | N.D  | N.D  | 8.03 |
| 216 | Plum Organics 351  | Fruits     | 83.96 | cluster1 | 5.09 | 0.31 | 2.67 | 0.99 | 0.44 | 0.03 | 0.04 | N.D | 0.25 | N.D  | N.D  | 0.05 | 0.01 | N.D  | 9.88 |
| 217 | Matene 352         | Fruits     | 81.35 | cluster1 | 4.13 | 0.24 | 3.00 | 0.22 | 0.17 | N.D  | 0.02 | N.D | 0.26 | N.D  | N.D  | 0.01 | N.D  | N.D  | 8.06 |
| 218 | Matene 353         | Fruits     | 82.46 | cluster1 | 2.01 | 0.17 | 3.34 | 0.22 | 0.13 | 0.03 | 0.02 | N.D | 0.25 | N.D  | N.D  | N.D  | 0.00 | N.D  | 6.16 |
| 219 | Matene 354         | Fruits     | 85.26 | cluster1 | 4.23 | 0.14 | 3.03 | 0.13 | 0.14 | N.D  | 0.02 | N.D | 0.24 | 0.01 | 0.00 | N.D  | N.D  | 0.01 | 7.94 |
| 220 | Matene 355         | Fruits     | 80.74 | cluster1 | 4.26 | 0.29 | 3.13 | 0.33 | 0.30 | N.D  | 0.04 | N.D | 0.48 | N.D  | N.D  | N.D  | N.D  | 0.01 | 8.84 |
| 221 | Matene 356         | Fruits     | 82.01 | cluster1 | 3.54 | 0.14 | 2.94 | 0.15 | 0.14 | N.D  | 0.01 | N.D | 0.21 | N.D  | N.D  | N.D  | N.D  | N.D  | 7.14 |
| 222 | Matene 357         | Fruits     | 84.13 | cluster1 | 4.24 | 0.18 | 1.44 | 0.20 | 0.17 | N.D  | 0.02 | N.D | 0.30 | N.D  | N.D  | 0.03 | N.D  | 0.01 | 6.59 |
| 223 | Paw Patrol 358     | Fruits     | 79.98 | cluster1 | 5.68 | 0.14 | 1.33 | 0.11 | 0.11 | N.D  | 0.02 | N.D | 0.27 | N.D  | N.D  | 0.05 | N.D  | 0.01 | 7.72 |
| 224 | Paw Patrol 359     | Fruits     | 84.13 | cluster1 | 3.70 | 0.21 | 2.81 | 0.22 | 0.20 | N.D  | 0.01 | N.D | 0.27 | N.D  | N.D  | 0.02 | N.D  | N.D  | 7.44 |
| 225 | Paw Patrol 360     | Fruits     | 80.13 | cluster1 | 5.65 | 0.12 | 1.65 | 0.23 | 0.13 | N.D  | 0.02 | N.D | 0.23 | N.D  | N.D  | 0.00 | N.D  | 0.00 | 8.06 |
| 226 | Organics 361       | Fruits     | 84.82 | cluster1 | 4.94 | 0.27 | 1.84 | 0.18 | 0.21 | 0.03 | 0.03 | N.D | 0.33 | N.D  | N.D  | 0.03 | 0.00 | N.D  | 7.86 |
| 227 | Organics 362       | Fruits     | 84.25 | cluster1 | 5.30 | 0.22 | 1.67 | 0.21 | 0.19 | N.D  | 0.02 | N.D | 0.22 | N.D  | N.D  | 0.05 | N.D  | N.D  | 7.88 |
| 228 | Organics 363       | Vegetables | 78.21 | cluster1 | 4.42 | 0.20 | 1.53 | 0.11 | 0.14 | 0.07 | 0.02 | N.D | 0.42 | N.D  | N.D  | 0.05 | N.D  | 0.00 | 6.96 |
| 229 | Organics 367       | Fruits     | 93.40 | cluster1 | 0.77 | 0.01 | 0.25 | 0.04 | 0.04 | 0.01 | 0.00 | N.D | 0.04 | N.D  | N.D  | 0.01 | N.D  | 0.00 | 1.17 |
| 230 | Organics 368       | Fruits     | 85.75 | cluster1 | 3.17 | 0.19 | 2.03 | 0.15 | 0.17 | N.D  | 0.02 | N.D | 0.27 | 0.01 | 0.00 | N.D  | N.D  | 0.00 | 6.02 |
| 231 | Organics 369       | Vegetables | 86.74 | cluster1 | 4.41 | 0.32 | 1.01 | 0.16 | 0.16 | 0.03 | 0.03 | N.D | 0.27 | N.D  | N.D  | 0.02 | 0.01 | N.D  | 6.40 |
| 232 | Pumpkin Tree 371   | Fruits     | 85.19 | cluster1 | 2.46 | 0.20 | 3.20 | 0.14 | 0.13 | 0.02 | 0.03 | N.D | 0.23 | N.D  | N.D  | 0.02 | 0.01 | N.D  | 6.43 |
| 233 | Pumpkin Tree 373   | Fruits     | 81.75 | cluster1 | 4.13 | 0.13 | 2.96 | 0.09 | 0.09 | 0.01 | 0.01 | N.D | 0.20 | N.D  | N.D  | N.D  | 0.01 | N.D  | 7.63 |
| 234 | Pumpkin Tree 374   | Fruits     | 77.56 | cluster1 | 2.85 | 0.36 | 2.44 | 0.91 | 0.65 | N.D  | 0.03 | N.D | 0.53 | N.D  | N.D  | 0.10 | N.D  | N.D  | 7.87 |
| 235 | Pumpkin Tree 375   | Fruits     | 83.93 | cluster1 | 4.94 | 0.26 | 1.60 | 0.19 | 0.28 | 0.03 | 0.02 | N.D | 0.25 | N.D  | N.D  | 0.03 | 0.03 | N.D  | 7.63 |
| 236 | Pumpkin Tree 376   | Fruits     | 81.18 | cluster1 | 5.47 | 0.30 | 2.78 | 0.12 | 0.22 | 0.03 | 0.02 | N.D | 0.31 | N.D  | N.D  | 0.03 | 0.02 | N.D  | 9.29 |
| 237 | Gerber Natural 378 | Fruits     | 83.50 | cluster1 | 4.49 | 0.19 | 2.37 | 0.16 | 0.16 | N.D  | 0.03 | N.D | 0.34 | N.D  | N.D  | 0.01 | N.D  | 0.01 | 7.75 |

|     |                                 |        |       |          |      |      |      |      |      |      |      |      |      |      |      |      |      |      |       |
|-----|---------------------------------|--------|-------|----------|------|------|------|------|------|------|------|------|------|------|------|------|------|------|-------|
| 238 | Gerber Natural<br>380           | Fruits | 84.58 | cluster1 | 2.19 | 0.26 | 1.46 | 0.50 | 0.37 | N.D  | 0.02 | N.D  | 0.31 | N.D  | N.D  | 0.03 | N.D  | N.D  | 5.14  |
| 239 | Geber Organics<br>382           | Fruits | 81.61 | cluster1 | 5.62 | 0.24 | 5.88 | 0.13 | 0.18 | 0.04 | 0.02 | N.D  | 0.25 | N.D  | N.D  | 0.03 | 0.01 | N.D  | 12.40 |
| 240 | Geber Organics<br>383           | Fruits | 85.81 | cluster1 | 2.92 | 0.15 | 4.86 | 0.26 | 0.14 | 0.03 | 0.02 | N.D  | 0.23 | N.D  | N.D  | N.D  | 0.00 | N.D  | 8.61  |
| 241 | Geber OrganicsVegetable<br>384s |        | 85.49 | cluster1 | 3.53 | 0.24 | 2.50 | 0.17 | 0.26 | N.D  | 0.04 | N.D  | 0.49 | N.D  | N.D  | 0.03 | N.D  | 0.01 | 7.28  |
| 242 | Geber OrganicsVegetable<br>385s |        | 84.06 | cluster1 | 4.77 | 0.19 | 2.99 | 0.08 | 0.09 | 0.01 | 0.02 | N.D  | 0.23 | N.D  | N.D  | 0.08 | 0.01 | N.D  | 8.46  |
| 243 | Geber Organics<br>386           | Fruits | 85.14 | cluster1 | 2.04 | 0.15 | 2.05 | 0.21 | 0.28 | N.D  | 0.03 | N.D  | 0.38 | 0.01 | 0.00 | N.D  | N.D  | 0.00 | 5.15  |
| 244 | Geber Organics<br>387           | Fruits | 84.96 | cluster1 | 3.48 | 0.23 | 2.91 | 0.17 | 0.17 | 0.03 | 0.02 | N.D  | 0.22 | N.D  | N.D  | 0.01 | 0.01 | N.D  | 7.25  |
| 245 | Geber Organics<br>388           | Fruits | 81.44 | cluster1 | 2.03 | 0.20 | 3.25 | 1.20 | 0.42 | N.D  | 0.05 | N.D  | 0.42 | N.D  | N.D  | N.D  | N.D  | 0.01 | 7.57  |
| 246 | Geber Organics<br>391           | Fruits | 83.23 | cluster1 | 3.27 | 0.18 | 3.14 | 0.19 | 0.15 | 0.04 | 0.02 | N.D  | 0.27 | N.D  | N.D  | 0.00 | 0.00 | N.D  | 7.28  |
| 247 | Geber Organics<br>392           | Fruits | 85.64 | cluster1 | 2.03 | 0.24 | 2.38 | 0.47 | 0.32 | 0.04 | 0.02 | N.D  | 0.29 | N.D  | N.D  | 0.03 | 0.01 | N.D  | 5.82  |
| 248 | Geber Organics<br>393           | Fruits | 81.92 | cluster1 | 2.21 | 0.21 | 2.21 | 0.77 | 0.25 | 0.03 | 0.03 | N.D  | 0.31 | N.D  | N.D  | N.D  | 0.01 | N.D  | 6.04  |
| 249 | Geber Organics<br>394           | Fruits | 77.39 | cluster1 | 3.59 | 0.32 | 2.53 | 0.51 | 0.53 | N.D  | 0.03 | N.D  | 0.44 | N.D  | N.D  | 0.06 | N.D  | N.D  | 8.00  |
| 250 | Geber OrganicsVegetable<br>395s |        | 86.00 | cluster1 | 2.12 | 0.11 | 1.00 | 0.09 | 0.13 | 0.04 | 0.02 | 0.00 | 0.31 | N.D  | N.D  | 0.02 | N.D  | 0.00 | 3.84  |
| 251 | Geber Organics<br>396           | Fruits | 76.29 | cluster1 | 4.32 | 0.35 | 1.64 | 0.07 | 0.23 | 0.08 | 0.03 | 0.00 | 0.51 | N.D  | N.D  | N.D  | N.D  | 0.01 | 7.23  |
| 252 | Geber Organics<br>398           | Fruits | 86.17 | cluster1 | 2.30 | 0.19 | 2.17 | 0.29 | 0.15 | 0.03 | 0.02 | N.D  | 0.23 | N.D  | N.D  | N.D  | 0.00 | N.D  | 5.39  |
| 253 | Geber Organics<br>401           | Fruits | 93.41 | cluster1 | 1.72 | 0.19 | 0.93 | 0.16 | 0.13 | N.D  | 0.01 | N.D  | 0.15 | N.D  | N.D  | 0.03 | N.D  | N.D  | 3.31  |
| 254 | Gerber 402                      | Fruits | 84.62 | cluster1 | 2.30 | 0.30 | 2.13 | 0.82 | 0.44 | N.D  | 0.02 | N.D  | 0.38 | N.D  | N.D  | 0.07 | N.D  | N.D  | 6.47  |
| 255 | Gerber 407                      | Fruits | 88.56 | cluster1 | 3.88 | 0.55 | 1.06 | 0.09 | 0.09 | N.D  | 0.01 | N.D  | 0.16 | N.D  | N.D  | 0.00 | N.D  | N.D  | 5.84  |
| 256 | Gerber Organic<br>408           | Fruits | 85.91 | cluster1 | 2.86 | 0.20 | 0.66 | 0.21 | 0.19 | N.D  | 0.02 | N.D  | 0.21 | N.D  | N.D  | 0.05 | N.D  | N.D  | 4.39  |

|     |                                        |                                   |       |          |      |      |      |      |      |      |      |      |      |      |      |      |     |      |       |
|-----|----------------------------------------|-----------------------------------|-------|----------|------|------|------|------|------|------|------|------|------|------|------|------|-----|------|-------|
| 257 | Gerber Organic 409                     | Fruits                            | 71.69 | cluster1 | 4.31 | 0.14 | 2.53 | 0.23 | 0.18 | N.D  | 0.04 | N.D  | 0.39 | N.D  | N.D  | N.D  | N.D | 0.01 | 7.82  |
| 258 | Gerber 412                             | Vegetables                        | 84.81 | cluster1 | 4.96 | 0.26 | N.D  | 0.19 | 0.19 | N.D  | 0.02 | N.D  | 0.21 | N.D  | N.D  | 0.05 | N.D | N.D  | 5.87  |
| 259 | Gerber 413                             | Fruits                            | 79.80 | cluster1 | 6.00 | 0.25 | 3.41 | 0.25 | 0.21 | N.D  | 0.04 | N.D  | 0.38 | 0.02 | 0.01 | 0.04 | N.D | 0.01 | 10.61 |
| 260 | Gerber 414                             | Fruits                            | 86.27 | cluster1 | 2.49 | 0.17 | 1.48 | 0.24 | 0.14 | N.D  | 0.03 | N.D  | 0.28 | N.D  | N.D  | 0.00 | N.D | 0.01 | 4.82  |
| 261 | Gerber 418                             | Fruits                            | 83.00 | cluster1 | 3.77 | 0.21 | 2.72 | 0.47 | 0.29 | N.D  | 0.03 | N.D  | 0.34 | N.D  | N.D  | 0.04 | N.D | 0.01 | 7.89  |
| 262 | Beach-Nut Naturals 419                 | Vegetables                        | 89.47 | cluster1 | 5.34 | 0.33 | N.D  | 0.14 | 0.40 | N.D  | 0.02 | N.D  | 0.13 | N.D  | N.D  | 0.07 | N.D | N.D  | 6.41  |
| 263 | Golden flaxseed                        | Beans, Peas, Legumes, Nuts, Seeds | 5.13  | cluster1 | 7.03 | 3.41 | N.D  | 4.10 | 4.29 | N.D  | 0.83 | N.D  | 1.75 | N.D  | N.D  | 0.43 | N.D | 0.07 | 21.91 |
| 264 | Hummus spread                          | Beans, Peas, Legumes, Nuts, Seeds | 64.78 | cluster1 | 4.99 | 0.19 | 0.18 | 0.06 | 0.95 | 0.02 | 0.01 | 0.00 | 0.03 | N.D  | N.D  | 0.08 | N.D | 0.01 | 6.53  |
| 265 | Tahini spread (365 Whole Foods Market) | Beans, Peas, Legumes, Nuts, Seeds | 16.11 | cluster1 | 1.14 | 0.53 | 0.25 | 0.16 | 0.94 | 0.04 | 0.03 | 0.00 | 0.02 | N.D  | N.D  | 0.98 | N.D | 0.03 | 4.12  |
| 266 | Tahini spread (Once Again)             | Beans, Peas, Legumes, Nuts, Seeds | 0.12  | cluster1 | 0.52 | 0.27 | 0.06 | 0.20 | 1.11 | 0.04 | 0.03 | 0.00 | 0.04 | N.D  | N.D  | 0.70 | N.D | 0.03 | 3.01  |
| 267 | Almond butter (MaraNatha)              | Beans, Peas, Legumes, Nuts, Seeds | 2.59  | cluster1 | 3.93 | 0.39 | 0.91 | 0.36 | 3.25 | 0.11 | 0.06 | 0.00 | 0.13 | N.D  | N.D  | 0.05 | N.D | 0.03 | 9.23  |
| 268 | Almond butter (Barney)                 | Beans, Peas, Legumes,             | 0.50  | cluster1 | 3.09 | 0.44 | 0.81 | 0.30 | 2.81 | 0.10 | 0.05 | 0.00 | 0.10 | N.D  | N.D  | 0.06 | N.D | 0.03 | 7.80  |

|     |                                         |                                               |      |          |      |      |      |      |      |      |      |      |      |     |     |      |     |      |      |
|-----|-----------------------------------------|-----------------------------------------------|------|----------|------|------|------|------|------|------|------|------|------|-----|-----|------|-----|------|------|
|     |                                         | Nuts,<br>Seeds                                |      |          |      |      |      |      |      |      |      |      |      |     |     |      |     |      |      |
| 269 | Almond butter<br>(Artisana<br>Organics) | Beans,<br>Peas,<br>Legumes,<br>Nuts,<br>Seeds | 1.21 | cluster1 | 1.65 | 0.43 | 0.34 | 0.30 | 2.34 | 0.10 | 0.05 | 0.00 | 0.09 | N.D | N.D | 0.06 | N.D | 0.03 | 5.41 |
| 270 | Tahini spread<br>(Kevala)               | Beans,<br>Peas,<br>Legumes,<br>Nuts,<br>Seeds | 0.02 | cluster1 | 1.47 | 0.73 | 0.22 | 0.20 | 1.30 | 0.03 | 0.04 | 0.00 | 0.04 | N.D | N.D | 0.94 | N.D | 0.04 | 5.02 |
| 271 | Tahini spread<br>(Artisana<br>Organics) | Beans,<br>Peas,<br>Legumes,<br>Nuts,<br>Seeds | 4.69 | cluster1 | 1.43 | 0.63 | 0.23 | 0.18 | 0.92 | 0.03 | 0.03 | 0.01 | 0.03 | N.D | N.D | 0.68 | N.D | 0.04 | 4.21 |
| 272 | Almond butter<br>(Once again)           | Beans,<br>Peas,<br>Legumes,<br>Nuts,<br>Seeds | 0.20 | cluster1 | 2.30 | 0.54 | 0.64 | 0.38 | 3.20 | 0.12 | 0.06 | 0.01 | 0.13 | N.D | N.D | 0.06 | N.D | 0.04 | 7.48 |
| 273 | Almon butter<br>(Alive &<br>Organics)   | Beans,<br>Peas,<br>Legumes,<br>Nuts,<br>Seeds | 1.37 | cluster1 | 2.55 | 0.68 | 0.77 | 0.41 | 3.14 | 0.11 | 0.06 | 0.01 | 0.13 | N.D | N.D | 0.07 | N.D | 0.03 | 7.95 |
| 274 | Black tahini<br>spread                  | Beans,<br>Peas,<br>Legumes,<br>Nuts,<br>Seeds | 0.53 | cluster1 | 1.24 | 0.74 | 0.26 | 0.30 | 1.03 | 0.03 | 0.05 | 0.01 | 0.04 | N.D | N.D | 0.58 | N.D | 0.04 | 4.32 |
| 275 | Dark roasted<br>peanut butter           | Beans,<br>Peas,<br>Legumes,<br>Nuts,<br>Seeds | 0.23 | cluster1 | 4.84 | 0.38 | 0.61 | 0.22 | 1.39 | 0.07 | 0.03 | 0.00 | 0.07 | N.D | N.D | 0.05 | N.D | 0.04 | 7.69 |

|     |                                       |                                   |       |          |      |      |      |      |      |      |      |      |      |      |     |      |      |      |       |      |
|-----|---------------------------------------|-----------------------------------|-------|----------|------|------|------|------|------|------|------|------|------|------|-----|------|------|------|-------|------|
| 276 | Coconut beverage                      | Beans, Peas, Legumes, Nuts, Seeds | 96.77 | cluster1 | 0.13 | 0.04 | 0.04 | 0.00 | 0.00 | 0.00 | 0.00 | 0.00 | 0.00 | 0.00 | N.D | N.D  | 0.01 | N.D  | 0.00  | 0.21 |
| 277 | Hemp beverage                         | Beans, Peas, Legumes, Nuts, Seeds | 95.99 | cluster1 | 0.07 | 0.03 | 0.01 | 0.00 | 0.03 | 0.01 | 0.00 | 0.00 | 0.00 | 0.00 | N.D | N.D  | 0.01 | N.D  | 0.00  | 0.17 |
| 278 | Macadamia milk                        | Beans, Peas, Legumes, Nuts, Seeds | 97.58 | cluster1 | 0.03 | 0.01 | 0.01 | 0.00 | 0.03 | 0.00 | 0.00 | 0.00 | 0.00 | 0.00 | N.D | N.D  | 0.03 | N.D  | 0.00  | 0.12 |
| 279 | Almond and cashew beverage with cocoa | Beans, Peas, Legumes, Nuts, Seeds | 92.37 | cluster1 | 1.87 | 0.02 | 0.39 | 0.01 | 0.10 | 0.01 | 0.00 | 0.00 | 0.01 | N.D  | N.D | 0.05 | N.D  | 0.00 | 2.47  |      |
| 280 | Almon, cashew and macademia beverage  | Beans, Peas, Legumes, Nuts, Seeds | 97.58 | cluster1 | 0.12 | 0.02 | 0.01 | 0.00 | 0.04 | 0.00 | 0.00 | 0.00 | 0.00 | N.D  | N.D | 0.03 | N.D  | 0.00 | 0.23  |      |
| 281 | Hemp seeds                            | Beans, Peas, Legumes, Nuts, Seeds | 5.48  | cluster1 | 1.10 | 0.62 | N.D  | 0.13 | 0.63 | N.D  | 0.10 | N.D  | 0.24 | N.D  | N.D | N.D  | N.D  | 0.10 | 2.91  |      |
| 282 | Dried coconut chips                   | Fruits                            | 2.41  | cluster1 | 3.45 | 1.28 | 0.06 | N.D  | 0.38 | N.D  | 0.05 | N.D  | 0.14 | N.D  | N.D | 7.42 | N.D  | 0.01 | 12.80 |      |
| 283 | Roasted seaweed                       | Vegetable s                       | 1.24  | cluster1 | 0.19 | 7.59 | 0.06 | 0.31 | 0.01 | 0.07 | N.D  | 0.01 | N.D  | N.D  | N.D | 0.74 | N.D  | 0.18 | 9.16  |      |
| 284 | Peanuts                               | Beans, Peas, Legumes,             | 0.68  | cluster1 | 4.94 | 0.48 | 0.54 | 0.31 | 2.32 | 0.11 | 0.05 | N.D  | 0.10 | N.D  | N.D | 0.07 | N.D  | 0.04 | 8.96  |      |

|     |                                     |                                               |      |          |      |      |      |      |      |      |      |      |      |     |     |      |     |      |      |
|-----|-------------------------------------|-----------------------------------------------|------|----------|------|------|------|------|------|------|------|------|------|-----|-----|------|-----|------|------|
|     |                                     | Nuts,<br>Seeds                                |      |          |      |      |      |      |      |      |      |      |      |     |     |      |     |      |      |
| 285 | Pistachio                           | Beans,<br>Peas,<br>Legumes,<br>Nuts,<br>Seeds | 2.61 | cluster1 | 4.25 | 1.29 | 0.93 | 0.17 | 1.96 | 0.10 | 0.05 | 0.01 | 0.09 | N.D | N.D | 0.06 | N.D | 0.05 | 8.96 |
| 286 | Peanuts<br>(Sunfood<br>Superfoods)  | Beans,<br>Peas,<br>Legumes,<br>Nuts,<br>Seeds | 2.54 | cluster1 | 5.01 | 0.49 | 0.59 | 0.26 | 1.79 | 0.10 | 0.03 | 0.00 | 0.06 | N.D | N.D | 0.06 | N.D | 0.03 | 8.44 |
| 287 | Macadamia<br>(Sunfood<br>Superfood) | Beans,<br>Peas,<br>Legumes,<br>Nuts,<br>Seeds | 0.82 | cluster1 | 4.17 | 0.26 | 0.96 | 0.23 | 1.50 | 0.10 | 0.04 | N.D  | 0.07 | N.D | N.D | 0.06 | N.D | 0.03 | 7.43 |
| 288 | Apricots w/<br>seeds                | Beans,<br>Peas,<br>Legumes,<br>Nuts,<br>Seeds | 4.91 | cluster1 | 2.99 | 0.54 | 0.88 | 0.46 | 4.11 | 0.16 | 0.10 | 0.01 | 0.18 | N.D | N.D | 0.12 | N.D | 0.03 | 9.57 |
| 289 | Brazil nuts                         | Beans,<br>Peas,<br>Legumes,<br>Nuts,<br>Seeds | 1.68 | cluster1 | 1.15 | 0.29 | 0.30 | 0.16 | 0.72 | 0.07 | 0.03 | 0.00 | 0.04 | N.D | N.D | 0.05 | N.D | 0.02 | 2.83 |
| 290 | Pistachio<br>(Fiddymment<br>Farm)   | Beans,<br>Peas,<br>Legumes,<br>Nuts,<br>Seeds | 1.66 | cluster1 | 3.80 | 1.27 | 0.67 | 0.18 | 2.14 | 0.10 | 0.06 | 0.00 | 0.10 | N.D | N.D | 0.05 | N.D | 0.05 | 8.43 |
| 291 | Pine nut                            | Beans,<br>Peas,<br>Legumes,<br>Nuts,<br>Seeds | 0.86 | cluster1 | 5.41 | 0.49 | 0.62 | 0.16 | 1.22 | 0.09 | 0.03 | 0.01 | 0.04 | N.D | N.D | 0.04 | N.D | 0.04 | 8.13 |

|     |                             |                                               |       |          |      |      |      |      |      |      |      |      |      |     |     |      |     |      |      |
|-----|-----------------------------|-----------------------------------------------|-------|----------|------|------|------|------|------|------|------|------|------|-----|-----|------|-----|------|------|
| 292 | Pecan                       | Beans,<br>Peas,<br>Legumes,<br>Nuts,<br>Seeds | 2.52  | cluster1 | 2.16 | 0.37 | 0.43 | 0.24 | 0.75 | 0.08 | 0.04 | 0.00 | 0.07 | N.D | N.D | 0.04 | N.D | 0.03 | 4.21 |
| 293 | Sunflower seeds             | Beans,<br>Peas,<br>Legumes,<br>Nuts,<br>Seeds | 3.85  | cluster1 | 1.44 | 0.64 | 0.34 | 0.26 | 2.18 | 0.08 | 0.04 | 0.01 | 0.08 | N.D | N.D | 0.18 | N.D | 0.05 | 5.31 |
| 294 | Pumpkin seeds               | Beans,<br>Peas,<br>Legumes,<br>Nuts,<br>Seeds | 5.29  | cluster1 | 1.32 | 0.62 | 0.20 | 0.65 | 0.61 | 0.06 | 0.03 | 0.00 | 0.06 | N.D | N.D | 0.02 | N.D | 0.04 | 3.62 |
| 295 | Minestrone soup             | Vegetables                                    | 90.27 | cluster1 | 5.01 | 0.24 | 0.13 | 0.07 | 0.13 | N.D  | 0.02 | N.D  | 0.12 | N.D | N.D | 0.01 | N.D | 0.01 | 5.74 |
| 296 | Quinoa kale red lentil soup | Vegetables                                    | 87.80 | cluster1 | 5.75 | 0.30 | 0.22 | 0.05 | 0.19 | N.D  | 0.03 | N.D  | 0.20 | N.D | N.D | 0.02 | N.D | 0.02 | 6.79 |
| 297 | Frozen peach flesh          | Fruits                                        | 86.97 | cluster1 | 4.22 | 0.18 | 0.18 | 0.11 | 0.27 | N.D  | 0.03 | N.D  | 0.36 | N.D | N.D | 0.03 | N.D | 0.01 | 5.39 |
| 298 | Frozen whole blueberry      | Fruits                                        | 84.42 | cluster1 | 4.50 | 0.24 | 0.13 | 0.22 | 0.16 | N.D  | 0.03 | N.D  | 0.25 | N.D | N.D | 0.02 | N.D | 0.00 | 5.56 |
| 299 | Frozen whole strawberry     | Fruits                                        | 89.37 | cluster1 | 2.91 | 0.07 | 0.13 | 0.14 | 0.06 | N.D  | 0.03 | N.D  | 0.27 | N.D | N.D | 0.02 | N.D | 0.01 | 3.64 |
| 300 | Frozen whole raspberry      | Fruits                                        | 84.90 | cluster1 | 2.57 | 0.20 | 0.14 | 0.15 | 0.16 | N.D  | 0.03 | N.D  | 0.28 | N.D | N.D | 0.02 | N.D | 0.01 | 3.56 |
| 301 | Frozen cauliflower          | Vegetables                                    | 93.30 | cluster1 | 1.30 | 0.29 | 0.24 | 0.11 | 0.32 | N.D  | 0.05 | N.D  | 0.32 | N.D | N.D | 0.05 | N.D | 0.02 | 2.70 |
| 302 | Frozen sweet pea            | Beans,<br>Peas,<br>Legumes,<br>Nuts,<br>Seeds | 77.58 | cluster1 | 5.98 | 0.47 | 0.27 | 0.11 | 0.66 | N.D  | 0.04 | N.D  | 0.16 | N.D | N.D | N.D  | N.D | 0.05 | 7.73 |
| 303 | Frozen spinach leaves       | Vegetables                                    | 91.20 | cluster1 | 0.29 | 0.24 | 0.13 | 0.07 | 0.33 | N.D  | 0.08 | N.D  | 0.31 | N.D | N.D | 0.01 | N.D | 0.02 | 1.48 |

|     |                               |                                   |       |          |      |      |      |      |      |      |      |      |      |     |     |      |     |      |      |
|-----|-------------------------------|-----------------------------------|-------|----------|------|------|------|------|------|------|------|------|------|-----|-----|------|-----|------|------|
| 304 | Frozen whole okra             | Vegetables                        | 91.96 | cluster1 | 1.06 | 0.16 | 0.17 | 0.11 | 0.10 | N.D  | 0.07 | N.D  | 0.40 | N.D | N.D | 0.02 | N.D | 0.02 | 2.10 |
| 305 | Frizen whole kale             | Vegetables                        | 91.21 | cluster1 | 0.94 | 0.28 | 0.08 | 0.11 | 0.20 | N.D  | 0.06 | N.D  | 0.50 | N.D | N.D | 0.01 | N.D | 0.03 | 2.20 |
| 306 | Frozen edamame                | Beans, Peas, Legumes, Nuts, Seeds | 72.92 | cluster1 | 3.49 | 1.15 | 0.22 | 0.13 | 0.51 | N.D  | 0.08 | N.D  | 0.21 | N.D | N.D | 0.15 | N.D | 0.05 | 6.00 |
| 307 | Frozen whole green beans      | Vegetables                        | 90.75 | cluster1 | 1.96 | 0.51 | 0.16 | 0.11 | 0.17 | N.D  | 0.05 | N.D  | 0.58 | N.D | N.D | 0.06 | N.D | 0.02 | 3.62 |
| 308 | Frozen whole brussel sprouts  | Vegetables                        | 87.18 | cluster1 | 2.52 | 0.72 | 0.19 | 0.12 | 0.85 | N.D  | 0.10 | N.D  | 0.59 | N.D | N.D | 0.06 | N.D | 0.05 | 5.21 |
| 309 | Frozen broccoli florets       | Vegetables                        | 89.17 | cluster1 | 1.00 | 0.51 | 0.13 | 0.17 | 0.63 | N.D  | 0.08 | N.D  | 0.49 | N.D | N.D | 0.03 | N.D | 0.05 | 3.09 |
| 310 | Dragon fruit flesh and seeds  | Fruits                            | 80.48 | cluster1 | 2.66 | 0.38 | 0.58 | 0.58 | 0.55 | N.D  | 0.05 | N.D  | 0.09 | N.D | N.D | N.D  | N.D | 0.01 | 4.91 |
| 311 | Wheat gluten burger patty     | Grain Products                    | 59.93 | cluster1 | 3.22 | 0.09 | 0.20 | 0.11 | 0.08 | N.D  | 0.00 | N.D  | 0.01 | N.D | N.D | N.D  | N.D | 0.01 | 3.72 |
| 312 | Ground non-meat (Quorn)       | Vegetables                        | 71.12 | cluster1 | 2.57 | 0.16 | 0.07 | 0.00 | 0.01 | N.D  | N.D  | 0.04 | N.D  | N.D | N.D | 0.46 | N.D | 0.05 | 3.36 |
| 313 | Plant based burger patty      | Beans, Peas, Legumes, Nuts, Seeds | 54.07 | cluster1 | 2.04 | 1.08 | 0.54 | 0.15 | 0.38 | N.D  | 0.05 | N.D  | 0.13 | N.D | N.D | N.D  | N.D | 0.07 | 4.44 |
| 314 | Ground non-meat (Beyond meat) | Beans, Peas, Legumes, Nuts, Seeds | 51.40 | cluster1 | 2.23 | 0.23 | N.D  | 0.02 | 0.14 | 0.04 | 0.01 | 0.00 | 0.03 | N.D | N.D | 0.02 | N.D | 0.04 | 2.77 |
| 315 | Naked Juice Power Machine     | Fruits                            | 88.07 | cluster1 | 2.51 | 0.06 | 0.12 | 0.08 | 0.12 | 0.06 | 0.01 | 0.00 | 0.11 | N.D | N.D | 0.01 | N.D | 0.00 | 3.10 |
| 316 | Naked Juice Green Machine     | Fruits                            | 92.05 | cluster1 | 2.10 | 0.05 | 0.16 | 0.02 | 0.04 | 0.02 | 0.00 | 0.00 | 0.06 | N.D | N.D | 0.01 | N.D | 0.00 | 2.44 |
| 317 | Naked Juice Orange Carrot     | Fruits                            | 86.91 | cluster1 | 3.31 | 0.11 | 0.19 | 0.02 | 0.08 | 0.05 | 0.01 | 0.00 | 0.08 | N.D | N.D | 0.02 | N.D | 0.00 | 3.87 |



|     |                                                                        |            |       |          |      |      |      |      |      |      |      |      |      |     |     |      |     |      |      |
|-----|------------------------------------------------------------------------|------------|-------|----------|------|------|------|------|------|------|------|------|------|-----|-----|------|-----|------|------|
| 318 | Naked Juice<br>Orange Mango                                            | Fruits     | 86.83 | cluster1 | 3.08 | 0.08 | 0.12 | 0.03 | 0.07 | 0.05 | 0.01 | 0.00 | 0.07 | N.D | N.D | 0.00 | N.D | 0.00 | 3.52 |
| 319 | Naked Juice<br>Pina Colada                                             | Fruits     | 86.24 | cluster1 | 3.87 | 0.08 | 0.18 | 0.02 | 0.04 | 0.05 | 0.00 | 0.00 | 0.04 | N.D | N.D | 0.03 | N.D | 0.00 | 4.31 |
| 320 | Naked Juice<br>Red Machine                                             | Fruits     | 88.78 | cluster1 | 2.53 | 0.10 | 0.39 | 0.07 | 0.05 | N.D  | 0.01 | N.D  | 0.09 | N.D | N.D | N.D  | N.D | 0.00 | 3.23 |
| 321 | Naked Juice<br>Mighty Mango                                            | Fruits     | 85.85 | cluster1 | 3.28 | 0.04 | 0.79 | 0.04 | 0.11 | N.D  | 0.01 | N.D  | 0.19 | N.D | N.D | N.D  | N.D | 0.00 | 4.46 |
| 322 | Naked Juice<br>Tropical Guava                                          | Fruits     | 85.49 | cluster1 | 3.83 | 0.13 | 0.21 | 0.06 | 0.07 | 0.03 | 0.01 | 0.00 | 0.08 | N.D | N.D | 0.01 | N.D | 0.00 | 4.43 |
| 323 | Naked Juice<br>Kale Blazer                                             | Fruits     | 90.06 | cluster1 | 3.16 | 0.16 | 0.96 | 0.03 | 0.08 | N.D  | 0.03 | N.D  | 0.13 | N.D | N.D | 0.01 | N.D | 0.01 | 4.57 |
| 324 | Naked Juice<br>Plant Protein<br>Peach Mango                            | Fruits     | 84.21 | cluster1 | 4.03 | 0.18 | 1.33 | 0.05 | 0.10 | N.D  | 0.01 | N.D  | 0.10 | N.D | N.D | 0.02 | N.D | 0.02 | 5.82 |
| 325 | Naked Juice<br>Blue Machine                                            | Fruits     | 84.87 | cluster1 | 4.48 | 0.07 | 1.00 | 0.05 | 0.04 | N.D  | 0.01 | N.D  | 0.16 | N.D | N.D | N.D  | N.D | 0.00 | 5.80 |
| 326 | Naked Juice<br>Rainbow<br>Machine                                      | Vegetables | 85.98 | cluster1 | 3.92 | 0.28 | 0.48 | 0.03 | 0.13 | N.D  | 0.02 | N.D  | 0.16 | N.D | N.D | N.D  | N.D | 0.00 | 5.01 |
| 327 | Naked Juice<br>Berry Veggie                                            | Fruits     | 87.49 | cluster1 | 3.80 | 0.18 | 0.73 | 0.07 | 0.08 | N.D  | 0.01 | N.D  | 0.18 | N.D | N.D | N.D  | N.D | 0.00 | 5.05 |
| 328 | Naked Juice<br>Strawberry<br>Banana                                    | Fruits     | 87.19 | cluster1 | 4.29 | 0.09 | 0.63 | 0.06 | 0.04 | N.D  | 0.01 | N.D  | 0.19 | N.D | N.D | N.D  | N.D | 0.00 | 5.32 |
| 329 | Chicken Noodle<br>Soup w/<br>Chicken Bone<br>Broth (Pacifiic<br>Foods) | Vegetables | 89.16 | cluster1 | 1.86 | 0.11 | 0.02 | 0.02 | 0.05 | 0.01 | 0.01 | 0.00 | 0.04 | N.D | N.D | 0.01 | N.D | 0.01 | 2.13 |
| 330 | Butternut<br>Squah Soup<br>(Pacific Foods)                             | Vegetables | 92.76 | cluster1 | 2.18 | 0.11 | 0.07 | 0.02 | 0.03 | 0.02 | 0.01 | 0.00 | 0.08 | N.D | N.D | 0.03 | N.D | 0.00 | 2.56 |
| 331 | Chicken & Wild<br>Rice Soup                                            | Vegetables | 90.85 | cluster1 | 4.90 | 0.11 | 0.06 | 0.06 | 0.06 | 0.01 | 0.01 | 0.00 | 0.05 | N.D | N.D | 0.01 | N.D | 0.01 | 5.27 |
| 332 | Roasted Red<br>Pepper Tomato                                           | Vegetables | 87.94 | cluster1 | 2.18 | 0.16 | 0.09 | 0.02 | 0.02 | 0.01 | 0.01 | 0.00 | 0.12 | N.D | N.D | 0.02 | N.D | 0.00 | 2.64 |

|     |                                                        |                                   |       |          |      |      |      |      |      |      |      |      |      |     |     |      |     |      |      |
|-----|--------------------------------------------------------|-----------------------------------|-------|----------|------|------|------|------|------|------|------|------|------|-----|-----|------|-----|------|------|
| 333 | Thai Sweet Potato Soup                                 | Vegetables                        | 89.27 | cluster1 | 2.35 | 0.18 | 0.06 | 0.02 | 0.07 | 0.00 | 0.01 | 0.00 | 0.11 | N.D | N.D | 0.10 | N.D | 0.00 | 2.92 |
| 334 | Creamy Cashew Carrot Ginger Soup                       | Vegetables                        | 92.84 | cluster1 | 1.74 | 0.12 | 0.01 | 0.02 | 0.05 | 0.01 | 0.01 | 0.00 | 0.06 | N.D | N.D | 0.09 | N.D | 0.00 | 2.12 |
| 335 | Southwest Style Chicken Tortilla Soup                  | Meat, Poultry, Fish, and Mixtures | 87.20 | cluster1 | 3.78 | 0.16 | N.D  | 0.07 | 0.17 | 0.02 | 0.01 | 0.00 | 0.08 | N.D | N.D | 0.06 | N.D | 0.01 | 4.36 |
| 336 | Poblano Pepper and Corn Chowder                        | Vegetables                        | 86.57 | cluster1 | 4.82 | 0.24 | N.D  | 0.05 | 0.09 | 0.01 | 0.01 | 0.00 | 0.03 | N.D | N.D | 0.01 | N.D | 0.00 | 5.26 |
| 337 | Chicken Noodle Soup (Pacific Foods)                    | Vegetables                        | 90.13 | cluster1 | 4.22 | 0.09 | 0.03 | 0.04 | 0.07 | 0.00 | 0.00 | 0.00 | 0.03 | N.D | N.D | 0.01 | N.D | 0.00 | 4.51 |
| 338 | Vegetable Lentil & Roasted Red Pepper Soup             | Vegetables                        | 86.64 | cluster1 | 5.34 | 0.45 | 0.08 | 0.09 | 0.37 | 0.02 | 0.02 | 0.00 | 0.11 | N.D | N.D | 0.06 | N.D | 0.01 | 6.55 |
| 339 | Tomato Creamy Soup (Imagine)                           | Vegetables                        | 93.03 | cluster1 | 2.40 | 0.11 | 0.10 | 0.02 | 0.03 | 0.00 | 0.01 | 0.00 | 0.11 | N.D | N.D | 0.03 | N.D | 0.00 | 2.82 |
| 340 | Portobello Mushroom Creamy Soup (Imagine)              | Vegetables                        | 95.41 | cluster1 | 1.97 | 0.06 | 0.03 | 0.00 | 0.01 | 0.00 | 0.00 | 0.00 | 0.02 | N.D | N.D | 0.00 | N.D | 0.00 | 2.12 |
| 341 | Garden Tomato Cream w/ Light Sodium (Imagine)          | Vegetables                        | 93.61 | cluster1 | 1.93 | 0.09 | 0.05 | 0.01 | 0.03 | 0.00 | 0.01 | 0.00 | 0.11 | N.D | N.D | 0.02 | N.D | 0.00 | 2.24 |
| 342 | Butternut Squash Creamy Soup w/ Light Sodium (Imagine) | Vegetables                        | 87.57 | cluster1 | 3.56 | 0.18 | 0.02 | 0.04 | 0.05 | 0.02 | 0.02 | 0.00 | 0.15 | N.D | N.D | 0.05 | N.D | 0.00 | 4.09 |

|     |                                    |                                   |       |          |      |      |      |      |      |      |      |      |      |     |     |      |     |      |       |
|-----|------------------------------------|-----------------------------------|-------|----------|------|------|------|------|------|------|------|------|------|-----|-----|------|-----|------|-------|
| 343 | Tomato Basil Creamy Soup (Imagine) | Vegetables                        | 93.19 | cluster1 | 2.05 | 0.09 | 0.02 | 0.02 | 0.03 | 0.01 | 0.01 | 0.00 | 0.10 | N.D | N.D | 0.02 | N.D | 0.00 | 2.35  |
| 344 | Potato Leak Creamy Soup            | Vegetables                        | 94.20 | cluster1 | 2.62 | 0.11 | 0.00 | 0.00 | 0.02 | 0.00 | 0.00 | 0.00 | 0.03 | N.D | N.D | N.D  | N.D | 0.00 | 2.79  |
| 345 | Broccoli Creamy Soup               | Vegetables                        | 95.12 | cluster1 | 1.97 | 0.09 | 0.01 | 0.01 | 0.05 | 0.00 | 0.01 | 0.00 | 0.06 | N.D | N.D | 0.01 | N.D | 0.00 | 2.22  |
| 346 | Super Greens Creamy Soup           | Vegetables                        | 94.02 | cluster1 | 1.71 | 0.10 | 0.04 | 0.01 | 0.08 | 0.01 | 0.01 | 0.00 | 0.07 | N.D | N.D | 0.01 | N.D | 0.00 | 2.05  |
| 347 | Whole Ground Flaxseed Meal         | Beans, Peas, Legumes, Nuts, Seeds | 7.18  | cluster1 | 2.77 | 2.53 | 0.45 | 2.06 | 2.30 | 0.38 | 0.43 | 0.01 | 0.55 | N.D | N.D | 0.05 | N.D | 0.05 | 11.57 |
| 348 | Vegi Soup Mix                      | Beans, Peas, Legumes, Nuts, Seeds | 72.15 | cluster1 | 6.46 | 0.35 | 0.14 | 0.04 | 1.62 | 0.01 | 0.02 | 0.00 | 0.00 | N.D | N.D | 0.01 | N.D | 0.02 | 8.67  |
| 349 | Instant Miso-Cup Soup (w/ Seaweed) | Beans, Peas, Legumes, Nuts, Seeds | 95.11 | cluster1 | 0.12 | 0.02 | 0.00 | 0.01 | 0.07 | 0.01 | 0.00 | 0.00 | 0.00 | N.D | N.D | 0.00 | N.D | 0.00 | 0.24  |
| 350 | Cream of Cauliflower Soup          | Vegetables                        | 90.22 | cluster1 | 4.99 | 0.16 | 0.01 | 0.01 | 0.06 | 0.01 | 0.01 | 0.00 | 0.03 | N.D | N.D | 0.01 | N.D | 0.00 | 5.28  |
| 351 | Extra Firm Tofu (Wildwood)         | Beans, Peas, Legumes, Nuts, Seeds | 83.67 | cluster1 | 0.29 | 0.16 | N.D  | 0.01 | 0.03 | 0.01 | 0.01 | 0.01 | 0.03 | N.D | N.D | 0.08 | N.D | 0.02 | 0.66  |
| 352 | Firm Tofu (Wildwood)               | Beans, Peas, Legumes, Nuts, Seeds | 83.64 | cluster1 | 0.17 | 0.16 | N.D  | 0.01 | 0.04 | 0.01 | 0.01 | 0.00 | 0.03 | N.D | N.D | 0.06 | N.D | 0.02 | 0.52  |

|     |                                |                                   |       |          |      |      |      |      |      |      |      |      |      |      |      |      |     |      |      |
|-----|--------------------------------|-----------------------------------|-------|----------|------|------|------|------|------|------|------|------|------|------|------|------|-----|------|------|
| 353 | High Protein Super Firm Tofu   | Beans, Peas, Legumes, Nuts, Seeds | 75.93 | cluster1 | 0.30 | 0.29 | N.D  | 0.01 | 0.06 | 0.02 | 0.02 | 0.01 | 0.04 | N.D  | N.D  | 0.12 | N.D | 0.02 | 0.89 |
| 354 | Firm Tofu (Nasoya)             | Beans, Peas, Legumes, Nuts, Seeds | 80.63 | cluster1 | 0.29 | 0.16 | 0.22 | 0.01 | 0.07 | 0.01 | 0.02 | 0.00 | 0.04 | 0.01 | 0.00 | 0.04 | N.D | 0.02 | 0.90 |
| 355 | Medium Firm Tofu (House Foods) | Beans, Peas, Legumes, Nuts, Seeds | 84.77 | cluster1 | 0.56 | 0.34 | 0.08 | 0.00 | 0.04 | 0.00 | 0.01 | 0.00 | 0.02 | N.D  | N.D  | 0.07 | N.D | 0.02 | 1.14 |
| 356 | Firm Tofu (House Foods)        | Beans, Peas, Legumes, Nuts, Seeds | 84.13 | cluster1 | 0.49 | 0.20 | 0.06 | 0.00 | 0.04 | 0.01 | 0.01 | 0.00 | 0.02 | N.D  | N.D  | 0.08 | N.D | 0.02 | 0.93 |
| 357 | Extra Firm Tofu (Nasoya)       | Beans, Peas, Legumes, Nuts, Seeds | 81.06 | cluster1 | 0.40 | 0.16 | 0.10 | 0.01 | 0.04 | 0.01 | 0.02 | 0.01 | 0.03 | N.D  | N.D  | 0.08 | N.D | 0.01 | 0.87 |
| 358 | Extra Firm Tofu (House Foods)  | Beans, Peas, Legumes, Nuts, Seeds | 80.43 | cluster1 | 0.26 | 0.19 | 0.11 | 0.00 | 0.05 | 0.01 | 0.01 | 0.01 | 0.02 | N.D  | N.D  | 0.05 | N.D | 0.02 | 0.74 |
| 359 | Extra Firm Silken Tofu         | Beans, Peas, Legumes, Nuts, Seeds | 87.50 | cluster1 | 0.27 | 0.17 | 0.07 | 0.00 | 0.03 | 0.01 | 0.01 | 0.01 | 0.01 | N.D  | N.D  | 0.05 | N.D | 0.02 | 0.64 |
| 360 | Soft Silken Tofu               | Beans, Peas, Legumes,             | 89.50 | cluster1 | 0.62 | 0.33 | 0.23 | 0.00 | 0.02 | 0.00 | 0.01 | 0.00 | 0.01 | N.D  | N.D  | 0.05 | N.D | 0.01 | 1.28 |

|     |                                         |                                               |       |          |      |      |      |      |      |      |      |      |      |      |      |      |     |      |      |
|-----|-----------------------------------------|-----------------------------------------------|-------|----------|------|------|------|------|------|------|------|------|------|------|------|------|-----|------|------|
|     |                                         | Nuts,<br>Seeds                                |       |          |      |      |      |      |      |      |      |      |      |      |      |      |     |      |      |
| 361 | Firm Silken Tofu                        | Beans,<br>Peas,<br>Legumes,<br>Nuts,<br>Seeds | 86.97 | cluster1 | 0.34 | 0.31 | 0.13 | 0.02 | 0.02 | 0.01 | 0.01 | 0.01 | 0.01 | N.D  | N.D  | 0.03 | N.D | 0.01 | 0.90 |
| 362 | Frozen Broccoli Cuts (Birds Eye)        | Vegetables                                    | 89.68 | cluster1 | 1.02 | 0.30 | 0.18 | 0.04 | 0.42 | 0.02 | 0.04 | 0.00 | 0.31 | N.D  | N.D  | 0.04 | N.D | 0.03 | 2.40 |
| 363 | Frozen Spinach Leaf Cut (Best Yet)      | Vegetables                                    | 90.73 | cluster1 | 0.37 | 0.19 | 0.11 | 0.04 | 0.24 | 0.01 | 0.04 | 0.00 | 0.18 | N.D  | N.D  | 0.01 | N.D | 0.02 | 1.20 |
| 364 | Frozen Whole Green Beans (Birds Eye)    | Vegetables                                    | 78.26 | cluster1 | 3.93 | 0.58 | 1.22 | 0.07 | 0.22 | 0.02 | 0.03 | 0.00 | 0.62 | 0.01 | 0.00 | 0.13 | N.D | 0.02 | 6.87 |
| 365 | Frozen Broccoli Cuts (Flav R Pac)       | Vegetables                                    | 89.12 | cluster1 | 1.33 | 0.32 | 0.20 | 0.06 | 0.49 | 0.02 | 0.05 | 0.01 | 0.30 | N.D  | N.D  | 0.05 | N.D | 0.03 | 2.86 |
| 366 | Frozen Cauliflower Florets (Flav R Pac) | Vegetables                                    | 93.10 | cluster1 | 0.91 | 0.18 | 0.06 | 0.03 | 0.25 | 0.01 | 0.02 | N.D  | 0.21 | N.D  | N.D  | 0.03 | N.D | 0.01 | 1.73 |
| 367 | Frozen Chopped Collard Greens           | Vegetables                                    | 90.50 | cluster1 | 0.65 | 0.32 | 0.05 | 0.10 | 0.28 | 0.03 | 0.05 | 0.00 | 0.38 | 0.00 | 0.00 | 0.02 | N.D | 0.02 | 1.90 |
| 368 | Frozen Whole Green beans (Birds Eye)    | Vegetables                                    | 87.62 | cluster1 | 2.07 | 0.40 | 0.06 | 0.06 | 0.22 | 0.02 | 0.04 | 0.00 | 0.55 | N.D  | N.D  | 0.11 | N.D | 0.02 | 3.54 |
| 369 | Frozen Whole Crinkle Cut Carrots        | Vegetables                                    | 89.17 | cluster1 | 2.99 | 0.54 | 0.13 | 0.02 | 0.29 | 0.03 | 0.05 | 0.00 | 0.40 | N.D  | N.D  | 0.03 | N.D | 0.01 | 4.49 |
| 370 | Frozen Chopped Baby Spinach (Birds Eye) | Vegetables                                    | 87.62 | cluster1 | 0.45 | 0.24 | 0.03 | 0.05 | 0.24 | 0.02 | 0.06 | 0.00 | 0.25 | N.D  | N.D  | 0.02 | N.D | 0.01 | 1.36 |
| 371 | Frozen Chopped                          | Vegetables                                    | 89.17 | cluster1 | 0.24 | 0.13 | 0.04 | 0.03 | 0.15 | 0.01 | 0.03 | 0.00 | 0.22 | N.D  | N.D  | 0.01 | N.D | 0.01 | 0.87 |

|     |                                                   |                                   |       |          |      |      |      |      |      |      |      |      |      |      |      |      |     |      |      |
|-----|---------------------------------------------------|-----------------------------------|-------|----------|------|------|------|------|------|------|------|------|------|------|------|------|-----|------|------|
|     | Spinach (Green Giant)                             |                                   |       |          |      |      |      |      |      |      |      |      |      |      |      |      |     |      |      |
| 372 | Frozen Spinach Cut (Cascadian)                    | Vegetables                        | 92.09 | cluster1 | 0.20 | 0.13 | 0.03 | 0.02 | 0.24 | 0.01 | 0.04 | 0.00 | 0.19 | N.D  | N.D  | 0.02 | N.D | 0.01 | 0.88 |
| 373 | Frozen Petite Peas (Birds Eye)                    | Beans, Peas, Legumes, Nuts, Seeds | 90.84 | cluster1 | 4.26 | 0.23 | 0.27 | 0.05 | 0.50 | 0.01 | 0.03 | 0.00 | 0.20 | N.D  | N.D  | 0.00 | N.D | 0.03 | 5.58 |
| 374 | Frozen Broccoli Florets (Stahlbush)               | Vegetables                        | 92.46 | cluster1 | 0.95 | 0.24 | 0.14 | 0.04 | 0.39 | 0.02 | 0.04 | 0.00 | 0.28 | 0.00 | N.D  | 0.03 | N.D | 0.03 | 2.17 |
| 375 | Frozen Spinach Leaf Cut (Signature Select)        | Vegetables                        | 92.09 | cluster1 | 0.21 | 0.13 | 0.10 | 0.04 | 0.12 | 0.00 | 0.03 | 0.00 | 0.20 | N.D  | N.D  | 0.01 | N.D | 0.01 | 0.87 |
| 376 | Frozen Chopped Spinach (Signature Select)         | Vegetables                        | 90.84 | cluster1 | 0.29 | 0.12 | 0.07 | 0.04 | 0.13 | 0.01 | 0.03 | 0.00 | 0.18 | N.D  | 0.00 | 0.00 | N.D | 0.01 | 0.91 |
| 377 | Frozen Petite Broccoli Florets (Signature Select) | Vegetables                        | 92.46 | cluster1 | 0.77 | 0.29 | 0.11 | 0.05 | 0.46 | 0.02 | 0.04 | 0.00 | 0.33 | N.D  | N.D  | 0.01 | N.D | 0.03 | 2.13 |
| 378 | Frozen Petite Brussel Sprouts (Woodstock)         | Vegetables                        | 85.69 | cluster1 | 1.99 | 0.39 | 0.08 | 0.05 | 0.63 | 0.03 | 0.06 | N.D  | 0.36 | N.D  | N.D  | 0.04 | N.D | 0.02 | 3.65 |
| 379 | Frozen Spinach Cut (Woodstock)                    | Vegetables                        | 80.28 | cluster1 | 0.97 | 0.38 | 0.21 | 0.09 | 0.41 | 0.03 | 0.07 | 0.01 | 0.59 | N.D  | N.D  | 0.06 | N.D | 0.02 | 2.84 |
| 380 | Frozen Whole Cauliflower (Stahlbush)              | Vegetables                        | 92.89 | cluster1 | 1.23 | 0.23 | 0.03 | 0.05 | 0.28 | 0.02 | 0.03 | 0.00 | 0.21 | N.D  | N.D  | 0.03 | N.D | 0.01 | 2.13 |
| 381 | Frozen Whole Baby Asparagus                       | Vegetables                        | 92.15 | cluster1 | 0.58 | 0.09 | 0.05 | 0.07 | 0.14 | 0.02 | 0.03 | 0.00 | 0.13 | N.D  | N.D  | 0.06 | N.D | 0.03 | 1.19 |

|     |                                                     |            |       |          |      |      |      |      |      |      |      |      |      |     |      |      |     |      |      |
|-----|-----------------------------------------------------|------------|-------|----------|------|------|------|------|------|------|------|------|------|-----|------|------|-----|------|------|
| 382 | Frozen Broccoli Florets (Birds Eye)                 | Vegetables | 91.33 | cluster1 | 0.72 | 0.23 | 0.04 | 0.06 | 0.34 | 0.02 | 0.04 | 0.00 | 0.29 | N.D | N.D  | 0.04 | N.D | 0.03 | 1.80 |
| 383 | Frozen Whole Edamame                                | Vegetables | 69.57 | cluster1 | 2.35 | 0.56 | 0.08 | 0.08 | 0.42 | 0.05 | 0.05 | 0.01 | 0.17 | N.D | N.D  | 0.18 | N.D | 0.04 | 4.00 |
| 384 | Frozen Petite Brussel Sprouts (Signature Select)    | Vegetables | 87.67 | cluster1 | 1.90 | 0.33 | 0.17 | 0.07 | 0.60 | 0.02 | 0.05 | 0.00 | 0.35 | N.D | N.D  | 0.05 | N.D | 0.02 | 3.56 |
| 385 | Frozen Cauliflower Florets (Signature Select)       | Vegetables | 93.14 | cluster1 | 1.55 | 0.26 | 0.57 | 0.06 | 0.32 | 0.03 | 0.03 | 0.00 | 0.20 | N.D | N.D  | 0.03 | N.D | 0.01 | 3.06 |
| 386 | Frozen French-sliced Green Beans (Signature Select) | Vegetables | 91.90 | cluster1 | 1.50 | 0.48 | 0.16 | 0.04 | 0.17 | 0.02 | 0.03 | 0.00 | 0.36 | N.D | N.D  | 0.02 | N.D | 0.01 | 2.80 |
| 387 | Frozen Broccoli Florets (Cascadian)                 | Vegetables | 90.38 | cluster1 | 0.92 | 0.26 | 0.12 | 0.06 | 0.42 | 0.02 | 0.04 | 0.00 | 0.29 | N.D | N.D  | 0.03 | N.D | 0.02 | 2.18 |
| 388 | Frozen Petite Brussel Sprouts (Signature Select)    | Vegetables | 87.60 | cluster1 | 1.56 | 0.38 | 0.06 | 0.06 | 0.65 | 0.03 | 0.06 | 0.00 | 0.37 | N.D | N.D  | 0.05 | N.D | 0.02 | 3.25 |
| 389 | Frozen Cut Green Beans (Cascadian)                  | Vegetables | 91.07 | cluster1 | 1.43 | 0.42 | 0.03 | 0.05 | 0.16 | 0.02 | 0.03 | 0.00 | 0.41 | N.D | 0.00 | 0.05 | N.D | 0.01 | 2.60 |
| 390 | Cilantro                                            | Vegetables | 87.56 | cluster1 | 0.46 | 0.16 | 0.70 | 0.05 | 0.08 | N.D  | 0.05 | 0.02 | 0.36 | N.D | N.D  | 0.03 | N.D | 0.01 | 1.91 |
| 391 | Garlic                                              | Vegetables | 56.89 | cluster1 | 0.88 | 0.40 | 3.22 | 0.06 | 0.11 | 0.06 | 0.03 | N.D  | 0.26 | N.D | N.D  | N.D  | N.D | 0.01 | 5.03 |
| 392 | Onion                                               | Vegetables | 91.78 | cluster1 | 1.66 | 0.20 | 0.45 | 0.02 | 0.02 | 0.02 | 0.01 | N.D  | 0.21 | N.D | N.D  | 0.00 | N.D | 0.00 | 2.60 |
| 393 | Jalapeno                                            | Vegetables | 92.94 | cluster1 | 1.10 | 0.14 | 0.36 | 0.03 | 0.06 | 0.02 | 0.05 | N.D  | 0.27 | N.D | N.D  | 0.01 | N.D | 0.01 | 2.04 |

|     |                      |                                   |       |          |      |      |      |      |      |      |      |      |      |      |     |      |     |      |      |
|-----|----------------------|-----------------------------------|-------|----------|------|------|------|------|------|------|------|------|------|------|-----|------|-----|------|------|
| 394 | Parsley              | Vegetables                        | 84.66 | cluster1 | 1.01 | 0.16 | 0.76 | 0.05 | 0.18 | N.D  | 0.03 | 0.00 | 0.39 | N.D  | N.D | 0.02 | N.D | 0.02 | 2.62 |
| 395 | Basil                | Vegetables                        | 86.93 | cluster1 | 1.24 | 0.24 | 0.56 | 0.05 | 0.06 | N.D  | 0.03 | 0.00 | 0.62 | N.D  | N.D | 0.01 | N.D | 0.01 | 2.82 |
| 396 | Baby Spring Mix      | Vegetables                        | 93.15 | cluster1 | 0.27 | 0.12 | 0.23 | 0.04 | 0.04 | 0.00 | 0.02 | 0.00 | 0.27 | N.D  | N.D | 0.02 | N.D | 0.01 | 1.03 |
| 397 | Broccoli             | Vegetables                        | 86.46 | cluster1 | 1.06 | 0.34 | 0.90 | 0.09 | 0.35 | 0.01 | 0.04 | 0.00 | 0.37 | N.D  | N.D | 0.07 | N.D | 0.03 | 3.27 |
| 398 | Pickles              | Vegetables                        | 94.98 | cluster1 | 0.41 | 0.11 | 0.44 | 0.03 | 0.03 | 0.00 | 0.01 | N.D  | 0.14 | N.D  | N.D | 0.01 | N.D | 0.00 | 1.17 |
| 399 | Tomato sauce         | Fruits                            | 90.32 | cluster1 | 1.58 | 0.07 | 0.31 | 0.02 | 0.03 | 0.03 | 0.01 | 0.00 | 0.28 | N.D  | N.D | 0.02 | N.D | 0.01 | 2.36 |
| 400 | Soy sauce            | Beans, Peas, Legumes, Nuts, Seeds | 68.36 | cluster1 | 0.26 | 0.52 | 0.03 | 0.16 | 0.15 | 0.05 | 0.03 | 0.00 | 0.05 | 0.00 | N.D | 0.15 | N.D | 0.01 | 1.41 |
| 401 | American Cheese      | Milk and Milk Products            | 20.39 | cluster1 | 1.79 | 1.63 | 0.05 | 0.00 | 0.01 | 0.01 | 0.00 | 0.00 | 0.00 | N.D  | N.D | 0.02 | N.D | 0.01 | 3.53 |
| 402 | Sharp Cheddar Cheese | Milk and Milk Products            | 34.41 | cluster1 | 0.02 | 0.08 | 0.02 | 0.00 | 0.00 | 0.00 | 0.00 | 0.00 | 0.00 | N.D  | N.D | 0.01 | N.D | 0.00 | 0.15 |
| 403 | Coca cola            | Sugars, Sweets, and Beverages     | 88.83 | cluster1 | 3.76 | 0.00 | 1.56 | 0.00 | 0.01 | 0.01 | 0.00 | 0.00 | 0.00 | N.D  | N.D | 0.01 | N.D | 0.00 | 5.35 |
| 404 | Sprite               | Sugars, Sweets, and Beverages     | 90.02 | cluster1 | 3.70 | 0.00 | 1.45 | 0.00 | 0.01 | 0.01 | 0.00 | 0.00 | 0.00 | N.D  | N.D | 0.01 | N.D | 0.00 | 5.19 |
| 405 | Pinenuts             | Beans, Peas, Legumes, Nuts, Seeds | 0.26  | cluster1 | 5.50 | 0.43 | 0.86 | 0.15 | 0.61 | 0.04 | 0.03 | 0.00 | 0.06 | N.D  | N.D | 0.04 | N.D | 0.02 | 7.73 |
| 406 | Walnuts              | Beans, Peas,                      | 1.84  | cluster1 | 1.69 | 0.35 | 0.17 | 0.30 | 0.49 | 0.10 | 0.07 | 0.01 | 0.20 | N.D  | N.D | 0.04 | N.D | 0.01 | 3.44 |



|     |                               |                                        |       |          |      |      |      |      |      |      |      |      |      |      |     |      |     |      |       |
|-----|-------------------------------|----------------------------------------|-------|----------|------|------|------|------|------|------|------|------|------|------|-----|------|-----|------|-------|
|     |                               | Legumes,<br>Nuts,<br>Seeds             |       |          |      |      |      |      |      |      |      |      |      |      |     |      |     |      |       |
| 407 | Coffee grounds                | Sugars,<br>Sweets,<br>and<br>Beverages | 0.78  | cluster1 | 0.23 | 2.39 | 0.13 | 0.06 | 0.61 | 0.01 | 0.07 | 0.03 | 0.03 | N.D  | N.D | 6.49 | N.D | 0.02 | 10.08 |
| 408 | Protein powder                | Milk and<br>Milk<br>Products           | 4.79  | cluster1 | 1.88 | 1.93 | 0.07 | 0.00 | 0.02 | 0.05 | 0.00 | 0.00 | 0.00 | 0.02 | N.D | 0.32 | N.D | 0.01 | 4.30  |
| 409 | Black tea                     | Sugars,<br>Sweets,<br>and<br>Beverages | 99.21 | cluster1 | 0.04 | 0.01 | 0.01 | 0.00 | 0.01 | 0.00 | 0.00 | 0.00 | 0.00 | N.D  | N.D | 0.00 | N.D | 0.00 | 0.07  |
| 410 | Gatorade                      | Sugars,<br>Sweets,<br>and<br>Beverages | 95.39 | cluster1 | 1.77 | 0.01 | 0.17 | 0.00 | 0.00 | 0.02 | 0.00 | 0.00 | 0.00 | N.D  | N.D | 0.00 | N.D | 0.00 | 1.98  |
| 411 | Cranberry juice               | Sugars,<br>Sweets,<br>and<br>Beverages | 88.71 | cluster1 | 4.10 | 0.06 | 0.72 | 0.00 | 0.01 | 0.04 | 0.00 | 0.00 | 0.01 | N.D  | N.D | 0.02 | N.D | 0.00 | 4.98  |
| 412 | Cabernet<br>Sauvignon<br>wine | Sugars,<br>Sweets,<br>and<br>Beverages | 97.67 | cluster1 | 0.11 | 0.02 | 0.01 | 0.00 | 0.02 | 0.00 | 0.00 | 0.00 | 0.03 | N.D  | N.D | 0.02 | N.D | 0.00 | 0.22  |
| 413 | Budweiser                     | Sugars,<br>Sweets,<br>and<br>Beverages | 96.23 | cluster1 | 1.93 | 0.02 | 0.02 | 0.03 | 0.03 | 0.00 | 0.00 | 0.00 | 0.00 | N.D  | N.D | 0.01 | N.D | 0.00 | 2.05  |
| 414 | Sour cream                    | Milk and<br>Milk<br>Products           | 73.62 | cluster1 | 1.30 | 1.22 | 0.03 | 0.00 | 0.00 | 0.00 | 0.00 | 0.00 | 0.00 | 0.00 | N.D | 0.00 | N.D | 0.01 | 2.59  |
| 415 | Yogurt                        | Milk and<br>Milk<br>Products           | 83.85 | cluster1 | 1.45 | 1.61 | 0.02 | 0.00 | 0.00 | 0.00 | 0.00 | 0.00 | 0.00 | N.D  | N.D | 0.01 | N.D | 0.01 | 3.12  |

|     |                                               |                                               |       |          |      |      |      |      |      |      |      |      |      |      |      |      |      |      |      |      |
|-----|-----------------------------------------------|-----------------------------------------------|-------|----------|------|------|------|------|------|------|------|------|------|------|------|------|------|------|------|------|
| 416 | Unsweetened<br>Vanilla almond<br>milk         | Beans,<br>Peas,<br>Legumes,<br>Nuts,<br>Seeds | 98.33 | cluster1 | 0.03 | 0.01 | 0.01 | 0.01 | 0.02 | 0.00 | 0.00 | 0.00 | 0.00 | 0.00 | 0.00 | N.D  | 0.00 | N.D  | 0.00 | 0.08 |
| 417 | Unsweetened<br>almond milk                    | Beans,<br>Peas,<br>Legumes,<br>Nuts,<br>Seeds | 97.34 | cluster1 | 0.05 | 0.02 | 0.01 | 0.01 | 0.03 | 0.00 | 0.00 | 0.00 | 0.00 | 0.00 | 0.00 | N.D  | 0.00 | N.D  | 0.00 | 0.12 |
| 418 | Low sodium<br>chicken broth                   | Meat,<br>Poultry,<br>Fish, and<br>Mixtures    | 98.86 | cluster1 | 0.07 | 0.00 | 0.06 | 0.00 | 0.00 | N.D  | 0.00 | 0.00 | 0.00 | 0.00 | 0.00 | N.D  | 0.00 | N.D  | 0.00 | 0.14 |
| 419 | Low sodium<br>vegetable<br>broth              | Vegetable<br>s                                | 99.60 | cluster1 | 0.06 | 0.01 | 0.02 | 0.00 | 0.00 | 0.00 | 0.00 | 0.00 | 0.01 | 0.00 | N.D  | 0.00 | N.D  | 0.00 | 0.11 |      |
| 420 | Rustic basil<br>pesto                         | Vegetable<br>s                                | 51.57 | cluster1 | 0.21 | 0.12 | 0.22 | N.D  | 0.04 | N.D  | 0.01 | 0.01 | 0.11 | N.D  | N.D  | N.D  | N.D  | 0.01 | 0.74 |      |
| 421 | Pesto w/ pine<br>nuts and<br>walnuts          | Vegetable<br>s                                | 33.86 | cluster1 | 0.86 | 1.68 | N.D  | 0.02 | 0.01 | N.D  | 0.01 | 0.01 | 0.05 | 0.01 | N.D  | N.D  | N.D  | 0.01 | 2.65 |      |
| 422 | Pasta sauce w/<br>tomato and<br>basil         | Vegetable<br>s                                | 89.57 | cluster1 | 1.33 | 0.12 | 0.48 | 0.04 | 0.04 | N.D  | 0.02 | 0.00 | 0.32 | 0.00 | N.D  | 0.01 | N.D  | 0.01 | 2.38 |      |
| 423 | Pasta sauce w/<br>tomato, basil,<br>olive oil | Vegetable<br>s                                | 85.68 | cluster1 | 1.72 | 0.13 | 0.63 | 0.05 | 0.05 | N.D  | 0.02 | N.D  | 0.35 | 0.00 | N.D  | 0.01 | N.D  | 0.01 | 2.97 |      |
| 424 | Muir's Diced<br>tomatoes                      | Vegetable<br>s                                | 92.97 | cluster1 | 1.25 | 0.06 | 0.40 | 0.02 | 0.02 | N.D  | 0.01 | 0.00 | 0.14 | 0.00 | N.D  | 0.01 | N.D  | 0.00 | 1.91 |      |
| 425 | Hunt's Tomato<br>paste                        | Vegetable<br>s                                | 69.05 | cluster1 | 4.17 | 0.27 | 1.53 | 0.10 | 0.08 | N.D  | 0.06 | 0.00 | 0.88 | 0.01 | N.D  | 0.09 | N.D  | 0.02 | 7.20 |      |
| 426 | Traditional<br>italian sauce                  | Vegetable<br>s                                | 83.03 | cluster1 | 3.00 | 0.13 | 1.07 | 0.04 | 0.05 | N.D  | 0.02 | 0.00 | 0.32 | N.D  | N.D  | 0.03 | N.D  | 0.01 | 4.66 |      |
| 427 | Hunt's Tomato<br>sauce                        | Vegetable<br>s                                | 86.02 | cluster1 | 1.88 | 0.11 | 0.60 | 0.04 | 0.03 | N.D  | 0.02 | 0.00 | 0.33 | 0.00 | N.D  | 0.01 | N.D  | 0.01 | 3.03 |      |

|     |                                                      |                                   |       |          |      |      |      |      |      |      |      |      |      |      |     |      |      |      |       |
|-----|------------------------------------------------------|-----------------------------------|-------|----------|------|------|------|------|------|------|------|------|------|------|-----|------|------|------|-------|
| 428 | Muir's Tomato sauce                                  | Vegetables                        | 90.41 | cluster1 | 1.32 | 0.08 | 0.44 | 0.03 | 0.03 | N.D  | 0.02 | 0.00 | 0.27 | 0.00 | N.D | 0.00 | N.D  | 0.01 | 2.20  |
| 429 | Muir's Tomato paste                                  | Vegetables                        | 71.71 | cluster1 | 4.59 | 0.20 | 1.61 | 0.12 | 0.09 | N.D  | 0.05 | 0.00 | 0.89 | N.D  | N.D | 0.07 | N.D  | 0.03 | 7.64  |
| 430 | Chicken Noodle Soup                                  | Meat, Poultry, Fish, and Mixtures | 90.65 | cluster1 | 3.82 | 0.05 | 0.05 | 0.05 | 0.06 | 0.00 | 0.00 | 0.00 | 0.01 | 0.00 | N.D | 0.02 | N.D  | 0.01 | 4.07  |
| 431 | Sunflower butter                                     | Beans, Peas, Legumes, Nuts, Seeds | 0.01  | cluster1 | 3.63 | 0.89 | 0.49 | 0.32 | 1.29 | 0.05 | 0.09 | 0.01 | 0.14 | 0.01 | N.D | 0.53 | 0.00 | 0.04 | 7.48  |
| 432 | Mayonnaise                                           | Fats, Oils, and Salad Dressings   | 34.64 | cluster1 | 0.08 | 0.01 | 0.06 | 0.01 | 0.00 | 0.01 | 0.00 | 0.00 | 0.00 | 0.00 | N.D | 0.01 | N.D  | 0.00 | 0.19  |
| 433 | Chunky vegetable soup                                | Vegetables                        | 94.86 | cluster1 | 1.13 | 0.06 | 0.10 | 0.03 | 0.05 | 0.00 | 0.01 | 0.00 | 0.10 | N.D  | N.D | 0.00 | N.D  | 0.01 | 1.50  |
| 434 | Olive oil                                            | Fats, Oils, and Salad Dressings   | 0.83  | cluster1 | 0.13 | 0.01 | 0.08 | 0.02 | 0.00 | 0.01 | 0.00 | 0.00 | 0.00 | 0.00 | N.D | 0.01 | N.D  | 0.00 | 0.27  |
| 435 | Unsalted butter                                      | Fats, Oils, and Salad Dressings   | 18.03 | cluster1 | 0.38 | 0.32 | 0.08 | 0.01 | 0.00 | 0.01 | 0.00 | 0.00 | 0.00 | 0.00 | N.D | 0.01 | N.D  | 0.00 | 0.84  |
| 436 | Pears, blueberries, and spinach blend                | Fruits                            | 78.88 | cluster1 | 1.97 | 0.22 | 0.69 | 0.32 | 0.28 | 0.02 | 0.03 | 0.00 | 0.27 | N.D  | N.D | 0.03 | N.D  | 0.02 | 3.86  |
| 437 | Veggies & wild rice baby food w/ mushroom & parmesan | Vegetables                        | 82.66 | cluster1 | 5.14 | 0.63 | 0.00 | 0.05 | 0.14 | 0.01 | 0.02 | N.D  | 0.12 | 0.00 | N.D | 0.02 | N.D  | 0.02 | 6.14  |
| 438 | Ataulfo mango                                        | Fruits                            | 61.45 | cluster1 | 6.14 | 0.33 | 2.72 | 0.17 | 0.41 | 0.05 | 0.04 | N.D  | 0.34 | N.D  | N.D | N.D  | N.D  | 0.01 | 10.19 |
| 439 | Bella mango                                          | Fruits                            | 84.67 | cluster1 | 4.50 | 0.17 | 1.04 | 0.06 | 0.14 | 0.03 | 0.02 | N.D  | 0.20 | N.D  | N.D | N.D  | N.D  | 0.00 | 6.16  |
| 440 | Lime                                                 | Fruits                            | 90.18 | cluster1 | 0.61 | 0.08 | 0.21 | 0.00 | 0.02 | 0.00 | 0.01 | 0.00 | 0.01 | N.D  | N.D | N.D  | N.D  | 0.00 | 0.95  |
| 441 | Kale                                                 | Vegetables                        | 85.92 | cluster1 | 0.84 | 0.34 | 0.08 | 0.16 | 0.34 | 0.03 | 0.08 | 0.00 | 0.53 | 0.01 | N.D | 0.07 | N.D  | 0.03 | 2.50  |

|     |                      |                                   |       |          |      |      |      |      |      |      |      |      |      |      |      |      |     |      |      |
|-----|----------------------|-----------------------------------|-------|----------|------|------|------|------|------|------|------|------|------|------|------|------|-----|------|------|
| 442 | Red kale             | Vegetables                        | 91.32 | cluster1 | 0.30 | 0.21 | N.D  | 0.11 | 0.15 | 0.02 | 0.05 | 0.00 | 0.42 | N.D  | N.D  | 0.07 | N.D | 0.01 | 1.35 |
| 443 | Lacinato Kale        | Vegetables                        | 89.17 | cluster1 | 0.16 | 0.24 | N.D  | 0.08 | 0.13 | 0.01 | 0.05 | 0.00 | 0.43 | 0.00 | N.D  | 0.04 | N.D | 0.02 | 1.17 |
| 444 | Green onion          | Vegetables                        | 92.30 | cluster1 | 1.55 | 0.29 | 0.31 | 0.09 | 0.06 | 0.02 | 0.02 | 0.00 | 0.32 | 0.00 | N.D  | 0.04 | N.D | 0.01 | 2.71 |
| 445 | Romaine lettuce      | Vegetables                        | 94.58 | cluster1 | 0.70 | 0.11 | 0.14 | 0.06 | 0.08 | 0.01 | 0.03 | 0.00 | 0.23 | 0.00 | N.D  | 0.02 | N.D | 0.01 | 1.40 |
| 446 | Eggplant             | Vegetables                        | 91.83 | cluster1 | 1.28 | 0.34 | 0.14 | 0.11 | 0.09 | 0.01 | 0.04 | 0.00 | 0.36 | N.D  | N.D  | 0.05 | N.D | 0.01 | 2.41 |
| 447 | Cabbage              | Vegetables                        | 93.14 | cluster1 | 1.52 | 0.08 | 0.03 | 0.07 | 0.10 | 0.01 | 0.02 | 0.00 | 0.20 | N.D  | N.D  | 0.03 | N.D | 0.00 | 2.07 |
| 448 | Albacore white tuna  | Meat, Poultry, Fish, and Mixtures | 75.50 | cluster1 | 1.63 | 0.02 | 0.03 | 0.00 | 0.02 | 0.00 | 0.00 | 0.00 | 0.01 | 0.00 | N.D  | 0.01 | N.D | 0.04 | 1.76 |
| 449 | Chunky light tuna    | Meat, Poultry, Fish, and Mixtures | 74.91 | cluster1 | 1.03 | 0.02 | 0.03 | 0.00 | 0.01 | 0.00 | 0.00 | 0.00 | 0.00 | 0.00 | N.D  | 0.01 | N.D | 0.07 | 1.18 |
| 450 | Chicken breast       | Meat, Poultry, Fish, and Mixtures | 61.97 | cluster1 | 0.12 | 0.01 | 0.03 | 0.00 | 0.00 | 0.00 | 0.00 | 0.00 | 0.00 | 0.00 | N.D  | 0.03 | N.D | 0.15 | 0.36 |
| 451 | Beef round tip steak | Meat, Poultry, Fish, and Mixtures | 59.39 | cluster1 | 0.23 | 0.02 | N.D  | 0.01 | 0.00 | 0.00 | 0.00 | 0.00 | 0.00 | 0.00 | N.D  | 0.06 | N.D | 0.08 | 0.40 |
| 452 | Shrimp               | Meat, Poultry, Fish, and Mixtures | 78.74 | cluster1 | 0.47 | 0.01 | 0.03 | 0.00 | 0.00 | 0.00 | 0.00 | 0.00 | 0.00 | 0.00 | N.D  | 0.02 | N.D | 0.05 | 0.59 |
| 453 | Brown egg yolk       | Eggs                              | 52.70 | cluster1 | 0.36 | 0.11 | 0.04 | 0.01 | 0.00 | 0.01 | 0.00 | 0.00 | 0.00 | 0.02 | 0.01 | 0.50 | N.D | 0.00 | 1.06 |
| 454 | Brown egg white      | Eggs                              | 87.69 | cluster1 | 0.33 | 0.04 | 0.02 | 0.00 | 0.00 | 0.00 | 0.00 | 0.00 | 0.00 | 0.02 | 0.02 | 0.36 | N.D | 0.00 | 0.80 |
| 455 | Whole brown egg      | Eggs                              | 74.32 | cluster1 | 0.47 | 0.07 | 0.03 | 0.00 | 0.00 | 0.00 | 0.00 | 0.00 | 0.00 | 0.04 | 0.03 | 0.52 | N.D | 0.00 | 1.17 |

|     |                                              |                                   |       |          |       |      |      |      |      |      |      |      |      |      |      |       |      |      |       |
|-----|----------------------------------------------|-----------------------------------|-------|----------|-------|------|------|------|------|------|------|------|------|------|------|-------|------|------|-------|
| 456 | Cabbage                                      | Vegetables                        | 94.55 | cluster1 | 1.37  | 0.12 | 0.08 | 0.06 | 0.12 | 0.01 | 0.02 | N.D  | 0.20 | 0.00 | N.D  | 0.03  | N.D  | 0.00 | 2.02  |
| 457 | Whole brown egg                              | Eggs                              | 77.37 | cluster1 | 0.49  | 0.07 | 0.03 | 0.01 | 0.00 | 0.00 | 0.00 | 0.00 | 0.00 | 0.03 | 0.03 | 0.48  | 0.00 | 0.00 | 1.14  |
| 458 | Thin almond nut crackers                     | Grain Products                    | 96.09 | cluster1 | 0.01  | 0.00 | 0.00 | 0.00 | 0.00 | 0.00 | 0.00 | 0.00 | 0.00 | 0.00 | N.D  | 0.00  | N.D  | 0.00 | 0.02  |
| 459 | Purple cabbage                               | Vegetables                        | 94.18 | cluster1 | 1.56  | 0.11 | 0.23 | 0.06 | 0.17 | 0.01 | 0.03 | N.D  | 0.24 | 0.00 | N.D  | 0.02  | N.D  | 0.00 | 2.43  |
| 460 | Purple cabbage                               | Vegetables                        | 91.08 | cluster1 | 1.16  | 0.12 | 0.33 | 0.09 | 0.21 | 0.02 | 0.03 | 0.00 | 0.26 | 0.00 | N.D  | 0.03  | N.D  | 0.01 | 2.26  |
| 461 | Coconut flour                                | Beans, Peas, Legumes, Nuts, Seeds | 2.33  | cluster5 | 5.37  | 5.19 | N.D  | 1.68 | 1.40 | N.D  | 0.12 | 0.05 | 0.32 | N.D  | N.D  | 43.09 | 0.02 | N.D  | 57.24 |
| 462 | Plantain banana (steamed 10 min)             | Fruits                            | 67.29 | cluster1 | 25.50 | 0.19 | 0.27 | 0.05 | 0.11 | 0.03 | 0.00 | N.D  | 0.29 | N.D  | N.D  | N.D   | N.D  | 0.00 | 26.46 |
| 463 | Steamed whole boomer gold potato             | Vegetables                        | 77.55 | cluster1 | 19.48 | 0.71 | N.D  | 0.08 | 0.12 | 0.01 | 0.02 | N.D  | 0.11 | N.D  | N.D  | 0.03  | N.D  | 0.01 | 20.56 |
| 464 | Steamed boomer gold potato flesh only        | Vegetables                        | 76.95 | cluster1 | 20.57 | 0.68 | N.D  | 0.09 | 0.12 | 0.01 | 0.02 | N.D  | 0.13 | N.D  | N.D  | 0.07  | N.D  | 0.01 | 21.70 |
| 465 | Steamed purple mini potato medley flesh only | Vegetables                        | 78.36 | cluster1 | 16.05 | 0.55 | N.D  | 0.02 | 0.07 | 0.01 | 0.03 | N.D  | 0.14 | N.D  | N.D  | N.D   | N.D  | 0.00 | 16.86 |
| 466 | Steamed red mini potato medley flesh only    | Vegetables                        | 77.79 | cluster1 | 16.64 | 0.38 | N.D  | 0.03 | 0.09 | 0.01 | 0.02 | N.D  | 0.13 | N.D  | N.D  | 0.01  | N.D  | 0.01 | 17.30 |
| 467 | Steamed whole russet potato                  | Vegetables                        | 77.26 | cluster1 | 15.91 | 0.59 | N.D  | 0.03 | 0.12 | 0.02 | 0.02 | N.D  | 0.15 | N.D  | N.D  | N.D   | N.D  | 0.01 | 16.86 |

|     |                                                      |                                   |       |          |       |      |      |      |      |      |      |      |      |     |     |       |      |      |       |
|-----|------------------------------------------------------|-----------------------------------|-------|----------|-------|------|------|------|------|------|------|------|------|-----|-----|-------|------|------|-------|
| 468 | Steamed white sweet potato flesh only                | Vegetables                        | 76.63 | cluster1 | 24.65 | 0.58 | 0.44 | 0.17 | 0.28 | 0.00 | 0.05 | N.D  | 0.42 | N.D | N.D | N.D   | N.D  | 0.01 | 26.60 |
| 469 | Sugar free Strawberry jam (Smuckers)                 | Fruits                            | 72.76 | cluster1 | 19.41 | 0.34 | N.D  | 0.02 | 0.07 | N.D  | 0.02 | N.D  | 0.31 | N.D | N.D | 0.24  | N.D  | 0.00 | 20.41 |
| 470 | Classic hummus                                       | Beans, Peas, Legumes, Nuts, Seeds | 56.37 | cluster1 | 20.15 | 1.30 | N.D  | 0.23 | 0.92 | 0.04 | 0.07 | N.D  | 0.24 | N.D | N.D | 1.08  | 0.03 | N.D  | 24.07 |
| 471 | Xanthan gum                                          | Grain Products                    | 7.66  | cluster1 | 19.24 | 0.10 | 0.26 | 0.06 | 0.14 | 0.05 | 0.21 | 1.49 | 0.10 | N.D | N.D | 13.39 | N.D  | 0.02 | 35.05 |
| 472 | Oatmeal & Sprouted quinoa w/ banana and strawberries | Grain Products                    | 63.06 | cluster1 | 16.22 | 0.42 | 2.06 | 0.18 | 0.26 | N.D  | 0.02 | N.D  | 0.21 | N.D | N.D | 0.27  | N.D  | N.D  | 19.63 |
| 473 | Oatmeal & Sprouted quinoa w/ apple and blueberry     | Grain Products                    | 67.35 | cluster1 | 16.76 | 0.61 | 1.33 | 0.36 | 0.36 | N.D  | 0.02 | N.D  | 0.18 | N.D | N.D | 0.29  | N.D  | N.D  | 19.90 |
| 474 | Sqash and pumpkin ravioli w/ sage sauce              | Grain Products                    | 71.26 | cluster1 | 18.06 | 0.53 | 0.16 | 0.40 | 0.33 | N.D  | 0.01 | N.D  | 0.19 | N.D | N.D | 0.09  | N.D  | N.D  | 19.77 |
| 475 | Spinach and Cheese ravioli w/ Marinara sauce         | Grain Products                    | 63.94 | cluster1 | 20.39 | 0.60 | 0.47 | 0.91 | 0.77 | N.D  | 0.03 | N.D  | 0.32 | N.D | N.D | 0.07  | N.D  | N.D  | 23.55 |
| 476 | Quinoa                                               | Grain Products                    | 67.07 | cluster1 | 19.48 | 0.32 | N.D  | 0.07 | 0.44 | N.D  | 0.03 | N.D  | 0.23 | N.D | N.D | 0.07  | N.D  | N.D  | 20.65 |
| 477 | White rice (Organics)                                | Grain Products                    | 64.69 | cluster1 | 26.63 | 0.07 | 0.18 | 0.03 | 0.09 | 0.01 | 0.00 | 0.00 | 0.00 | N.D | N.D | 0.01  | N.D  | 0.01 | 27.04 |
| 478 | Enriched long white rice (Mahatma)                   | Grain Products                    | 71.30 | cluster1 | 26.66 | 0.13 | N.D  | 0.05 | 0.07 | N.D  | 0.00 | N.D  | 0.00 | N.D | N.D | 0.04  | N.D  | N.D  | 26.95 |

|     |                                              |                                   |       |          |       |      |      |      |      |      |      |      |      |      |      |      |     |      |       |
|-----|----------------------------------------------|-----------------------------------|-------|----------|-------|------|------|------|------|------|------|------|------|------|------|------|-----|------|-------|
| 479 | Brown rice (Mahatma)                         | Grain Products                    | 73.05 | cluster1 | 21.06 | 0.10 | 0.12 | 0.08 | 0.17 | 0.01 | 0.00 | 0.00 | 0.00 | N.D  | N.D  | 0.01 | N.D | 0.01 | 21.58 |
| 480 | Wheat farina cereal/cream of wheat           | Grain Products                    | 83.86 | cluster1 | 14.58 | 0.13 | N.D  | 0.17 | 0.14 | N.D  | 0.00 | N.D  | 0.00 | N.D  | N.D  | 0.02 | N.D | N.D  | 15.05 |
| 481 | Rolled oats                                  | Grain Products                    | 75.70 | cluster1 | 19.46 | 0.27 | N.D  | 0.48 | 0.41 | N.D  | 0.00 | N.D  | 0.01 | N.D  | N.D  | 0.04 | N.D | N.D  | 20.67 |
| 482 | Organic bulgur and quinoa mix                | Grain Products                    | 64.36 | cluster1 | 20.74 | 0.29 | N.D  | 0.34 | 0.32 | N.D  | 0.01 | N.D  | 0.06 | N.D  | N.D  | 0.16 | N.D | N.D  | 21.91 |
| 483 | Gluten-free spaghetti                        | Grain Products                    | 71.93 | cluster1 | 23.19 | 0.07 | 0.13 | 0.05 | 0.21 | 0.01 | 0.00 | 0.00 | 0.00 | N.D  | N.D  | 0.01 | N.D | 0.01 | 23.67 |
| 484 | Spaghetti made w/ zucchini and spinach puree | Grain Products                    | 60.20 | cluster1 | 26.37 | 0.11 | 0.18 | 0.27 | 0.47 | 0.01 | 0.00 | 0.00 | 0.01 | N.D  | N.D  | 0.03 | N.D | 0.02 | 27.47 |
| 485 | No. 5 Spaghetti                              | Grain Products                    | 59.65 | cluster1 | 24.03 | 0.14 | 0.15 | 0.35 | 0.71 | 0.01 | 0.00 | 0.00 | 0.00 | N.D  | N.D  | 0.03 | N.D | 0.02 | 25.43 |
| 486 | Chickpea spaghetti                           | Beans, Peas, Legumes, Nuts, Seeds | 63.12 | cluster1 | 16.83 | 0.21 | N.D  | 0.61 | 0.45 | N.D  | 0.01 | N.D  | 0.02 | N.D  | N.D  | N.D  | N.D | N.D  | 18.12 |
| 487 | Black bean penne                             | Beans, Peas, Legumes, Nuts, Seeds | 59.71 | cluster1 | 24.80 | 0.89 | N.D  | 0.34 | 1.63 | N.D  | 0.05 | 0.02 | 0.26 | 0.03 | 0.01 | 0.27 | N.D | 0.03 | 28.32 |
| 488 | Green lentil fusili                          | Beans, Peas, Legumes, Nuts, Seeds | 59.82 | cluster1 | 24.17 | 0.99 | N.D  | 0.09 | 0.74 | N.D  | 0.04 | N.D  | 0.15 | N.D  | N.D  | 0.01 | N.D | 0.04 | 26.22 |
| 489 | Inca red quinoa                              | Grain Products                    | 55.75 | cluster1 | 20.00 | 0.33 | 0.05 | 0.09 | 0.73 | N.D  | 0.05 | N.D  | 0.57 | N.D  | N.D  | N.D  | N.D | N.D  | 21.82 |
| 490 | Red whole grain quinoa                       | Grain Products                    | 61.62 | cluster1 | 17.10 | 0.20 | N.D  | 0.10 | 0.84 | N.D  | 0.09 | N.D  | 0.71 | 0.02 | 0.01 | 0.03 | N.D | 0.10 | 19.19 |

|     |                                 |                                   |       |          |       |      |      |      |      |      |      |      |      |      |      |      |     |      |       |
|-----|---------------------------------|-----------------------------------|-------|----------|-------|------|------|------|------|------|------|------|------|------|------|------|-----|------|-------|
| 491 | Whole grain quinoa              | Grain Products                    | 66.66 | cluster1 | 25.57 | N.D  | 0.05 | 0.07 | 0.54 | N.D  | 0.07 | N.D  | 0.31 | N.D  | N.D  | N.D  | N.D | 0.07 | 26.68 |
| 492 | Red whole grain bulgur          | Grain Products                    | 72.64 | cluster1 | 24.56 | 0.24 | N.D  | 0.56 | 0.48 | N.D  | 0.00 | 0.00 | 0.01 | N.D  | N.D  | 0.04 | N.D | 0.01 | 25.92 |
| 493 | Tri-color whole grain quinoa    | Grain Products                    | 69.32 | cluster1 | 15.62 | 0.11 | 0.10 | 0.03 | 0.61 | 0.03 | 0.02 | 0.01 | 0.05 | N.D  | N.D  | 0.02 | N.D | 0.03 | 16.64 |
| 494 | Whole grain sorghum             | Grain Products                    | 65.42 | cluster1 | 22.17 | 0.14 | 0.11 | 0.15 | 0.34 | 0.02 | 0.00 | 0.01 | 0.01 | N.D  | N.D  | 0.02 | N.D | 0.01 | 22.97 |
| 495 | Whole grain kasha               | Grain Products                    | 65.15 | cluster1 | 21.66 | 0.13 | 0.10 | 0.04 | 0.40 | 0.02 | 0.02 | 0.00 | 0.03 | N.D  | N.D  | 0.01 | N.D | 0.02 | 22.44 |
| 496 | Whole grain brown lentils       | Beans, Peas, Legumes, Nuts, Seeds | 75.18 | cluster1 | 17.22 | 0.89 | N.D  | 0.08 | 0.67 | N.D  | 0.04 | N.D  | 0.14 | N.D  | N.D  | 0.07 | N.D | 0.03 | 19.14 |
| 497 | Whole grain red lentils         | Beans, Peas, Legumes, Nuts, Seeds | 67.62 | cluster1 | 17.76 | 1.00 | N.D  | 0.07 | 0.69 | N.D  | 0.04 | N.D  | 0.11 | N.D  | N.D  | 0.04 | N.D | 0.04 | 19.75 |
| 498 | Dried corn grits/polenta        | Grain Products                    | 71.27 | cluster1 | 21.37 | 0.05 | 0.15 | 0.05 | 0.21 | 0.01 | 0.00 | 0.00 | 0.00 | N.D  | N.D  | 0.01 | N.D | 0.01 | 21.86 |
| 499 | Whole grain rolled oats         | Grain Products                    | 72.11 | cluster1 | 17.26 | 0.09 | 0.11 | 0.26 | 0.32 | 0.02 | 0.00 | 0.00 | 0.00 | N.D  | N.D  | 0.03 | N.D | 0.01 | 18.10 |
| 500 | Whole grain millets             | Grain Products                    | 62.38 | cluster1 | 16.04 | 0.11 | 0.10 | 0.06 | 0.24 | 0.02 | 0.00 | 0.00 | 0.00 | N.D  | N.D  | 0.01 | N.D | 0.01 | 16.61 |
| 501 | Whole grain farro               | Grain Products                    | 69.54 | cluster1 | 17.97 | 0.21 | 0.13 | 0.43 | 0.73 | 0.01 | 0.00 | 0.00 | 0.00 | N.D  | N.D  | 0.04 | N.D | 0.01 | 19.53 |
| 502 | Whole grain pearl barley        | Grain Products                    | 72.68 | cluster1 | 16.77 | 0.06 | 0.11 | 0.32 | 0.70 | 0.02 | 0.00 | 0.00 | 0.00 | N.D  | N.D  | 0.04 | N.D | 0.01 | 18.04 |
| 503 | Whole grain irish oat           | Grain Products                    | 68.08 | cluster1 | 22.68 | 0.27 | N.D  | 0.35 | 0.32 | N.D  | 0.01 | 0.01 | 0.05 | 0.02 | 0.01 | 0.09 | N.D | 0.03 | 23.83 |
| 504 | Freeze dried Roasted red pepper | Vegetables                        | 3.55  | cluster1 | 22.54 | 0.64 | 5.00 | 0.39 | 0.53 | N.D  | 0.37 | N.D  | 3.09 | N.D  | N.D  | 0.13 | N.D | 0.05 | 32.74 |
| 505 | Carrot sticks                   | Vegetables                        | 0.43  | cluster1 | 24.11 | 5.61 | 0.39 | 0.20 | 2.36 | N.D  | 0.61 | N.D  | 5.06 | N.D  | N.D  | 0.53 | N.D | 0.09 | 38.96 |



|     |                                  |                                   |       |          |       |      |      |      |      |      |      |      |      |     |     |      |     |      |       |
|-----|----------------------------------|-----------------------------------|-------|----------|-------|------|------|------|------|------|------|------|------|-----|-----|------|-----|------|-------|
| 506 | Dried apricots                   | Fruits                            | 9.92  | cluster1 | 18.80 | 1.02 | 2.12 | 0.67 | 1.44 | N.D  | 0.23 | N.D  | 1.68 | N.D | N.D | 0.06 | N.D | 0.04 | 26.08 |
| 507 | Freeze dried raspberry           | Fruits                            | 0.56  | cluster1 | 17.29 | 1.23 | 4.13 | 3.31 | 1.61 | N.D  | 0.30 | N.D  | 1.54 | N.D | N.D | 0.19 | N.D | 0.05 | 29.66 |
| 508 | Freeze dried apple rings         | Fruits                            | 9.63  | cluster1 | 25.78 | 2.16 | 3.63 | 0.85 | 2.22 | N.D  | 0.19 | N.D  | 1.62 | N.D | N.D | 0.30 | N.D | 0.02 | 36.77 |
| 509 | Flaxseed crackers                | Beans, Peas, Legumes, Nuts, Seeds | 1.54  | cluster1 | 20.17 | 1.06 | 0.46 | 0.70 | 2.18 | 0.18 | 0.15 | 0.01 | 0.23 | N.D | N.D | 0.40 | N.D | 0.06 | 25.60 |
| 510 | Flax bread (Food for life)       | Grain Products                    | 41.65 | cluster1 | 22.24 | N.D  | 0.30 | 0.51 | 1.16 | 0.05 | 0.02 | 0.00 | 0.02 | N.D | N.D | 0.07 | N.D | 0.03 | 24.42 |
| 511 | Frozen falafel                   | Beans, Peas, Legumes, Nuts, Seeds | 46.67 | cluster1 | 20.91 | 2.51 | 0.35 | 0.22 | 2.00 | N.D  | 0.12 | N.D  | 0.45 | N.D | N.D | 0.09 | N.D | 0.05 | 26.71 |
| 512 | Kale and quinoa burger patty     | Vegetables                        | 49.80 | cluster1 | 17.34 | 0.37 | 0.11 | 0.14 | 0.24 | N.D  | 0.02 | N.D  | 0.22 | N.D | N.D | N.D  | N.D | 0.02 | 18.46 |
| 513 | Pumpkin and spinach burger patty | Grain Products                    | 47.08 | cluster1 | 15.69 | 0.56 | 0.13 | 0.16 | 0.25 | N.D  | 0.03 | N.D  | 0.31 | N.D | N.D | N.D  | N.D | 0.02 | 17.15 |
| 514 | Barley and quinoa burger patty   | Beans, Peas, Legumes, Nuts, Seeds | 31.48 | cluster1 | 18.61 | 0.70 | 1.36 | 0.41 | 0.78 | N.D  | 0.05 | N.D  | 0.34 | N.D | N.D | N.D  | N.D | 0.06 | 22.31 |
| 515 | Pumpkin Seed & Flaxseed Granola  | Grain Products                    | 3.07  | cluster1 | 23.11 | 0.34 | 0.40 | 0.18 | 0.29 | 0.02 | 0.01 | 0.00 | 0.00 | N.D | N.D | 0.02 | N.D | 0.01 | 24.38 |
| 516 | Original Waffle                  | Grain Products                    | 41.07 | cluster1 | 21.80 | 0.25 | 0.21 | 0.26 | 0.33 | 0.03 | 0.00 | 0.00 | 0.00 | N.D | N.D | 0.04 | N.D | 0.01 | 22.95 |
| 517 | 8 Whole Grain, Multigrain Waffle | Grain Products                    | 47.38 | cluster1 | 22.66 | 0.37 | 0.15 | 0.71 | 0.60 | 0.04 | 0.01 | 0.00 | 0.00 | N.D | N.D | 0.04 | N.D | 0.01 | 24.59 |

|     |                                               |                                   |       |          |       |      |      |      |      |      |      |      |      |      |     |      |     |      |       |
|-----|-----------------------------------------------|-----------------------------------|-------|----------|-------|------|------|------|------|------|------|------|------|------|-----|------|-----|------|-------|
| 518 | Blueberry Waffle                              | Grain Products                    | 39.87 | cluster1 | 19.41 | 0.15 | 0.35 | 0.76 | 0.54 | 0.01 | 0.00 | 0.00 | 0.00 | N.D  | N.D | 0.06 | N.D | 0.01 | 21.29 |
| 519 | Original Pancake                              | Grain Products                    | 51.54 | cluster1 | 24.35 | 0.26 | 0.19 | 0.21 | 0.29 | 0.01 | 0.00 | 0.00 | 0.00 | N.D  | N.D | 0.06 | N.D | 0.01 | 25.38 |
| 520 | Frozen Golden Corn Kernels (Signature Select) | Vegetables                        | 76.00 | cluster1 | 17.63 | 0.19 | 1.67 | 0.35 | 0.65 | 0.00 | 0.01 | 0.00 | 0.02 | N.D  | N.D | 0.07 | N.D | 0.02 | 20.61 |
| 521 | Cranberry                                     | Fruits                            | 6.02  | cluster1 | 26.54 | 0.34 | 4.89 | 0.19 | 0.35 | 0.33 | 0.02 | N.D  | 0.32 | N.D  | N.D | 0.02 | N.D | 0.00 | 32.99 |
| 522 | Chocolate                                     | Sugars, Sweets, and Beverages     | 0.11  | cluster1 | 23.05 | 2.56 | 2.26 | 0.05 | 0.19 | 0.17 | 0.02 | 0.00 | 0.07 | N.D  | N.D | 0.05 | N.D | 0.01 | 28.43 |
| 523 | Dates                                         | Fruits                            | 8.85  | cluster1 | 24.52 | 0.34 | 6.97 | 0.21 | 0.25 | 0.25 | 0.04 | N.D  | 0.46 | N.D  | N.D | 0.03 | N.D | 0.01 | 33.09 |
| 524 | Vegan white cheddar chickpea puffs            | Beans, Peas, Legumes, Nuts, Seeds | 49.03 | cluster1 | 24.55 | 0.86 | 0.22 | 0.11 | 1.43 | 0.01 | 0.04 | 0.00 | 0.06 | 0.00 | N.D | 0.03 | N.D | 0.02 | 27.35 |
| 525 | Bananas and carrots oat bar                   | Grain Products                    | 11.42 | cluster1 | 24.74 | 0.59 | 4.34 | 0.24 | 0.18 | 0.05 | 0.05 | N.D  | 0.23 | 0.00 | N.D | 0.02 | N.D | 0.02 | 30.47 |
| 526 | Apples and spinach oat bar                    | Grain Products                    | 8.81  | cluster1 | 27.35 | 0.73 | 3.88 | 0.45 | 0.36 | 0.04 | 0.06 | N.D  | 0.22 | 0.04 | N.D | 0.13 | N.D | 0.02 | 33.28 |
| 527 | Powerseed bread sweetened w/ fruit juice      | Grain Products                    | 38.01 | cluster1 | 22.26 | 0.34 | 0.27 | 1.48 | 1.07 | 0.01 | 0.02 | 0.01 | 0.05 | 0.00 | N.D | 0.12 | N.D | 0.02 | 25.67 |
| 528 | Almond flour                                  | Beans, Peas, Legumes, Nuts, Seeds | 4.53  | cluster1 | 26.59 | 0.42 | 0.36 | 0.21 | 0.95 | 0.03 | 0.05 | 0.01 | 0.06 | 0.00 | N.D | 0.18 | N.D | 0.01 | 28.88 |
| 529 | Bean threads (vermicelli)                     | Beans, Peas, Legumes, Nuts, Seeds | 79.81 | cluster1 | 18.25 | 0.08 | 0.11 | 0.00 | 0.04 | 0.00 | 0.00 | 0.00 | 0.00 | 0.00 | N.D | 0.00 | N.D | 0.00 | 18.49 |

|     |                                               |                                               |       |          |       |      |      |      |      |      |      |      |      |      |      |      |     |      |       |
|-----|-----------------------------------------------|-----------------------------------------------|-------|----------|-------|------|------|------|------|------|------|------|------|------|------|------|-----|------|-------|
| 530 | Chickpeas<br>rotini pasta                     | Beans,<br>Peas,<br>Legumes,<br>Nuts,<br>Seeds | 61.07 | cluster1 | 17.14 | 0.93 | 0.19 | 0.10 | 1.06 | 0.02 | 0.03 | 0.02 | 0.04 | 0.00 | N.D  | 0.11 | N.D | 0.03 | 19.67 |
| 531 | Yellow lentil<br>penne                        | Beans,<br>Peas,<br>Legumes,<br>Nuts,<br>Seeds | 60.79 | cluster1 | 22.37 | 1.01 | 0.21 | 0.09 | 0.88 | 0.01 | 0.03 | 0.01 | 0.03 | 0.00 | N.D  | 0.04 | N.D | 0.04 | 24.73 |
| 532 | Toasted Pearl<br>couscous                     | Grain<br>Products                             | 70.16 | cluster1 | 21.99 | 0.18 | 0.18 | 0.23 | 0.25 | 0.00 | 0.00 | 0.00 | 0.00 | 0.00 | N.D  | 0.05 | N.D | 0.01 | 22.89 |
| 533 | Mix couscous                                  | Grain<br>Products                             | 78.83 | cluster1 | 14.87 | 0.11 | 0.13 | 0.15 | 0.16 | 0.00 | 0.00 | 0.00 | 0.00 | 0.00 | N.D  | 0.03 | N.D | 0.01 | 15.47 |
| 534 | Brown long<br>grain rice                      | Grain<br>Products                             | 69.29 | cluster1 | 25.25 | 0.14 | 0.17 | 0.08 | 0.15 | 0.00 | 0.00 | 0.00 | 0.00 | 0.00 | N.D  | 0.02 | N.D | 0.01 | 25.83 |
| 535 | Wild blend rice                               | Grain<br>Products                             | 74.28 | cluster1 | 18.11 | 0.16 | 0.14 | 0.08 | 0.13 | 0.00 | 0.00 | 0.00 | 0.01 | 0.00 | N.D  | 0.02 | N.D | 0.01 | 18.67 |
| 536 | Tri-color<br>couscous                         | Grain<br>Products                             | 75.15 | cluster1 | 19.99 | 0.20 | 0.15 | 0.26 | 0.27 | 0.00 | 0.00 | 0.00 | 0.00 | 0.00 | N.D  | 0.04 | N.D | 0.00 | 20.92 |
| 537 | Spinach and<br>ricotta ravioli                | Grain<br>Products                             | 51.91 | cluster1 | 20.61 | 1.51 | N.D  | 0.34 | 0.22 | 0.01 | 0.01 | N.D  | 0.03 | N.D  | N.D  | 0.06 | N.D | 0.01 | 22.79 |
| 538 | Cheddar<br>cheese, beans,<br>and rice burrito | Beans,<br>Peas,<br>Legumes,<br>Nuts,<br>Seeds | 51.77 | cluster1 | 24.24 | 0.37 | 0.25 | 0.55 | 0.90 | 0.03 | 0.02 | 0.01 | 0.04 | 0.00 | N.D  | 0.10 | N.D | 0.02 | 26.53 |
| 539 | Red lentil pasta                              | Beans,<br>Peas,<br>Legumes,<br>Nuts,<br>Seeds | 59.84 | cluster1 | 19.36 | 0.66 | 0.22 | 0.08 | 0.86 | 0.01 | 0.02 | 0.01 | 0.02 | 0.00 | 0.00 | 0.04 | N.D | 0.04 | 21.33 |
| 540 | Yellow banana<br>flesh only                   | Fruits                                        | 75.94 | cluster1 | 14.14 | 0.12 | 1.83 | 0.04 | 0.07 | 0.01 | 0.00 | N.D  | 0.25 | N.D  | N.D  | 0.08 | N.D | N.D  | 16.55 |
| 541 | Red banana<br>(steamed<br>10min)              | Fruits                                        | 73.67 | cluster1 | 13.51 | 0.16 | 0.83 | 0.10 | 0.12 | 0.01 | 0.01 | N.D  | 0.29 | N.D  | N.D  | 0.12 | N.D | N.D  | 15.15 |

|     |                                              |            |       |          |       |      |      |      |      |      |      |     |      |     |     |      |     |      |       |
|-----|----------------------------------------------|------------|-------|----------|-------|------|------|------|------|------|------|-----|------|-----|-----|------|-----|------|-------|
| 542 | Whole yellow nectarine (HGO Farms)           | Fruits     | 83.89 | cluster1 | 6.46  | 0.18 | 1.77 | 0.07 | 0.34 | 0.02 | 0.02 | N.D | 0.40 | N.D | N.D | 0.03 | N.D | 0.00 | 9.29  |
| 543 | Yellow mango                                 | Fruits     | 76.53 | cluster1 | 11.19 | 0.97 | 3.94 | 0.27 | 0.67 | 0.11 | 0.04 | N.D | 0.49 | N.D | N.D | 0.10 | N.D | N.D  | 17.79 |
| 544 | Pixie tangerine                              | Fruits     | 77.95 | cluster1 | 7.57  | 0.26 | 2.26 | 0.06 | 0.18 | 0.02 | 0.09 | N.D | 0.34 | N.D | N.D | 0.03 | N.D | N.D  | 10.81 |
| 545 | Golden kiwi                                  | Fruits     | 76.39 | cluster1 | 9.22  | 0.17 | 4.06 | 0.03 | 0.06 | 0.02 | 0.01 | N.D | 0.22 | N.D | N.D | 0.04 | N.D | N.D  | 13.83 |
| 546 | Green seedless grape                         | Fruits     | 81.37 | cluster1 | 7.66  | 0.09 | 2.65 | 0.02 | 0.05 | 0.01 | 0.01 | N.D | 0.11 | N.D | N.D | 0.00 | N.D | N.D  | 10.59 |
| 547 | Steamed sweet white corn kernels             | Vegetables | 77.52 | cluster1 | 8.98  | 0.29 | 0.13 | 0.71 | 0.56 | 0.02 | 0.01 | N.D | 0.03 | N.D | N.D | 0.04 | N.D | N.D  | 10.76 |
| 548 | Steamed whole blushing belle potato          | Vegetables | 84.12 | cluster1 | 8.60  | 0.37 | 0.07 | 0.05 | 0.09 | 0.00 | 0.02 | N.D | 0.13 | N.D | N.D | N.D  | N.D | 0.01 | 9.35  |
| 549 | Steamed blushing belle potato flesh only     | Vegetables | 81.65 | cluster1 | 13.43 | 0.62 | 0.18 | 0.06 | 0.11 | 0.00 | 0.02 | N.D | 0.15 | N.D | N.D | 0.01 | N.D | 0.01 | 14.57 |
| 550 | Pureed sweet potato flesh only               | Vegetables | 81.08 | cluster1 | 6.41  | 0.34 | 0.13 | 0.04 | 0.16 | 0.02 | 0.04 | N.D | 0.41 | N.D | N.D | 0.00 | N.D | 0.01 | 7.56  |
| 551 | Steamed whole purple mini potato medley      | Vegetables | 80.10 | cluster1 | 14.10 | 0.48 | N.D  | 0.01 | 0.08 | 0.03 | 0.03 | N.D | 0.14 | N.D | N.D | N.D  | N.D | 0.01 | 14.87 |
| 552 | Steamed whole red mini potato medley         | Vegetables | 80.63 | cluster1 | 11.25 | 0.36 | 0.08 | 0.04 | 0.08 | 0.00 | 0.02 | N.D | 0.13 | N.D | N.D | N.D  | N.D | 0.01 | 11.97 |
| 553 | Steamed whole yellow mini potato medley      | Vegetables | 85.56 | cluster1 | 7.51  | 0.44 | N.D  | 0.02 | 0.07 | 0.01 | 0.01 | N.D | 0.14 | N.D | N.D | 0.00 | N.D | 0.01 | 8.20  |
| 554 | Steamed yellow mini potato medley flesh only | Vegetables | 82.51 | cluster1 | 10.29 | 0.38 | N.D  | 0.01 | 0.07 | 0.02 | 0.01 | N.D | 0.11 | N.D | N.D | 0.00 | N.D | 0.01 | 10.91 |
| 555 | Steamed russet potato flesh only             | Vegetables | 76.63 | cluster1 | 13.45 | 0.55 | N.D  | 0.05 | 0.08 | 0.02 | 0.01 | N.D | 0.08 | N.D | N.D | N.D  | N.D | 0.00 | 14.25 |

|     |                                                 |                                               |       |          |       |      |      |      |      |      |      |      |      |     |     |      |      |      |       |
|-----|-------------------------------------------------|-----------------------------------------------|-------|----------|-------|------|------|------|------|------|------|------|------|-----|-----|------|------|------|-------|
| 556 | Steamed whole<br>garnet yam                     | Vegetable<br>s                                | 79.52 | cluster1 | 7.72  | 0.35 | N.D  | 0.11 | 0.18 | 0.03 | 0.04 | N.D  | 0.28 | N.D | N.D | 0.00 | N.D  | 0.01 | 8.72  |
| 557 | Steamed<br>garnet yam<br>flesh only             | Vegetable<br>s                                | 80.22 | cluster1 | 7.53  | 0.41 | N.D  | 0.05 | 0.18 | 0.05 | 0.03 | N.D  | 0.26 | N.D | N.D | N.D  | N.D  | 0.01 | 8.51  |
| 558 | Pureed garnet<br>yam flesh only                 | Vegetable<br>s                                | 81.35 | cluster1 | 8.24  | 0.47 | 1.51 | 0.13 | 0.21 | 0.01 | 0.03 | N.D  | 0.29 | N.D | N.D | N.D  | N.D  | 0.01 | 10.90 |
| 559 | Steamed whole<br>red sweet<br>potato            | Vegetable<br>s                                | 81.42 | cluster1 | 9.00  | 0.44 | 0.15 | 0.26 | 0.23 | 0.02 | 0.05 | N.D  | 0.42 | N.D | N.D | 0.00 | N.D  | 0.01 | 10.59 |
| 560 | Steamed red<br>sweet potato<br>flesh only       | Vegetable<br>s                                | 79.66 | cluster1 | 8.38  | 0.37 | N.D  | 0.16 | 0.20 | 0.03 | 0.05 | N.D  | 0.43 | N.D | N.D | 0.01 | N.D  | 0.01 | 9.65  |
| 561 | Steamed<br>golden sweet<br>potato flesh<br>only | Vegetable<br>s                                | 79.19 | cluster1 | 10.39 | 0.34 | N.D  | 0.13 | 0.18 | 0.02 | 0.04 | N.D  | 0.34 | N.D | N.D | 0.01 | N.D  | 0.01 | 11.46 |
| 562 | Steamed whole<br>oyster<br>mushrooms            | Vegetable<br>s                                | 87.27 | cluster1 | 7.32  | 0.19 | N.D  | 0.15 | 0.02 | 0.06 | 0.00 | 0.04 | 0.00 | N.D | N.D | 0.25 | N.D  | 0.03 | 8.05  |
| 563 | Cashew butter<br>(Open Nature)                  | Beans,<br>Peas,<br>Legumes,<br>Nuts,<br>Seeds | 0.85  | cluster1 | 14.71 | 1.21 | N.D  | 0.24 | 0.49 | 0.04 | 0.04 | N.D  | 0.34 | N.D | N.D | N.D  | 0.04 | N.D  | 17.10 |
| 564 | Peanut Butter<br>(Justin's)                     | Beans,<br>Peas,<br>Legumes,<br>Nuts,<br>Seeds | 0.00  | cluster1 | 10.23 | 1.12 | N.D  | 0.93 | 2.58 | 0.13 | 0.14 | N.D  | 0.51 | N.D | N.D | 0.15 | 0.03 | N.D  | 15.82 |
| 565 | Hazelnut and<br>Almond Butter<br>(Justin's)     | Beans,<br>Peas,<br>Legumes,<br>Nuts,<br>Seeds | 10.02 | cluster1 | 7.52  | 0.91 | N.D  | 0.69 | 1.97 | 0.13 | 0.14 | N.D  | 0.51 | N.D | N.D | N.D  | 0.01 | N.D  | 11.87 |
| 566 | Vanilla almond<br>Butter (Justin's)             | Beans,<br>Peas,                               | 0.66  | cluster1 | 10.09 | 1.63 | 0.09 | 0.98 | 3.79 | 0.14 | 0.20 | N.D  | 0.37 | N.D | N.D | N.D  | 0.02 | N.D  | 17.32 |

|     |                                     |                                               |       |          |       |      |      |      |      |      |      |      |      |     |     |      |     |      |       |
|-----|-------------------------------------|-----------------------------------------------|-------|----------|-------|------|------|------|------|------|------|------|------|-----|-----|------|-----|------|-------|
|     |                                     | Legumes,<br>Nuts,<br>Seeds                    |       |          |       |      |      |      |      |      |      |      |      |     |     |      |     |      |       |
| 567 | Rice milk                           | Grain<br>Products                             | 89.10 | cluster1 | 8.93  | N.D  | N.D  | N.D  | 0.01 | N.D  | 0.00 | N.D  | 0.00 | N.D | N.D | 0.02 | N.D | N.D  | 8.96  |
| 568 | Roasted red<br>pepper<br>hummus     | Beans,<br>Peas,<br>Legumes,<br>Nuts,<br>Seeds | 42.15 | cluster1 | 8.75  | 0.87 | 0.17 | 0.13 | 0.83 | 0.04 | 0.05 | 0.01 | 0.11 | N.D | N.D | 0.52 | N.D | 0.03 | 11.50 |
| 569 | Roasted pine<br>nut hummus          | Beans,<br>Peas,<br>Legumes,<br>Nuts,<br>Seeds | 56.72 | cluster1 | 8.89  | 1.12 | N.D  | 0.11 | 0.91 | N.D  | 0.07 | N.D  | 0.25 | N.D | N.D | 0.22 | N.D | 0.04 | 11.60 |
| 570 | Canned low<br>sodium pinto<br>bean  | Beans,<br>Peas,<br>Legumes,<br>Nuts,<br>Seeds | 75.80 | cluster1 | 8.62  | 0.16 | 0.09 | 0.16 | 0.77 | 0.03 | 0.01 | 0.01 | 0.03 | N.D | N.D | 0.08 | N.D | 0.01 | 9.98  |
| 571 | Canned black<br>beans (S&W)         | Beans,<br>Peas,<br>Legumes,<br>Nuts,<br>Seeds | 76.95 | cluster1 | 8.78  | 0.23 | 0.08 | 0.18 | 1.56 | 0.04 | 0.01 | 0.01 | 0.04 | N.D | N.D | 0.11 | N.D | 0.02 | 11.06 |
| 572 | Canned<br>garbanzo<br>beans         | Beans,<br>Peas,<br>Legumes,<br>Nuts,<br>Seeds | 74.67 | cluster1 | 9.91  | 0.31 | 0.07 | 0.06 | 1.28 | 0.02 | 0.02 | 0.00 | 0.03 | N.D | N.D | 0.02 | N.D | 0.02 | 11.74 |
| 573 | Canned black<br>beans<br>(Organics) | Beans,<br>Peas,<br>Legumes,<br>Nuts,<br>Seeds | 75.25 | cluster1 | 7.14  | 0.18 | 0.06 | 0.17 | 1.34 | 0.04 | 0.01 | 0.01 | 0.04 | N.D | N.D | 0.09 | N.D | 0.02 | 9.10  |
| 574 | Canned Kidney<br>beans              | Beans,<br>Peas,                               | 67.57 | cluster1 | 10.61 | 0.61 | 0.13 | 0.31 | 0.99 | 0.09 | 0.03 | 0.02 | 0.13 | N.D | N.D | 0.21 | N.D | 0.02 | 13.15 |

|     |                                   | Legumes,<br>Nuts,<br>Seeds                    |       |          |       |      |      |      |      |      |      |      |      |     |     |      |      |      |       |
|-----|-----------------------------------|-----------------------------------------------|-------|----------|-------|------|------|------|------|------|------|------|------|-----|-----|------|------|------|-------|
| 575 | Canned<br>Blackeye beans          | Beans,<br>Peas,<br>Legumes,<br>Nuts,<br>Seeds | 73.90 | cluster1 | 11.16 | 0.18 | 0.07 | 0.07 | 0.89 | 0.03 | 0.02 | 0.01 | 0.04 | N.D | N.D | 0.03 | N.D  | 0.02 | 12.51 |
| 576 | Canned Butter<br>beans            | Beans,<br>Peas,<br>Legumes,<br>Nuts,<br>Seeds | 72.31 | cluster1 | 8.02  | 0.18 | 0.06 | 0.19 | 1.27 | 0.03 | 0.02 | 0.01 | 0.06 | N.D | N.D | 0.35 | N.D  | 0.01 | 10.19 |
| 577 | Canned<br>garbanzo<br>beans (S&W) | Beans,<br>Peas,<br>Legumes,<br>Nuts,<br>Seeds | 66.89 | cluster1 | 14.01 | 0.29 | 0.08 | 0.07 | 1.69 | 0.05 | 0.03 | 0.01 | 0.05 | N.D | N.D | 0.03 | N.D  | 0.02 | 16.31 |
| 578 | Commercial<br>Mac and<br>Cheese   | Vegetable<br>s                                | 74.01 | cluster1 | 13.15 | 0.52 | 0.53 | 0.02 | 0.23 | N.D  | 0.02 | N.D  | 0.16 | N.D | N.D | 0.06 | N.D  | N.D  | 14.69 |
| 579 | Organic Happy<br>Baby 293         | Fruits                                        | 78.23 | cluster1 | 8.71  | 0.21 | 2.17 | 0.09 | 0.11 | N.D  | 0.02 | N.D  | 0.36 | N.D | N.D | 0.04 | N.D  | 0.01 | 11.72 |
| 580 | Organic Happy<br>Baby 298         | Fruits                                        | 73.22 | cluster1 | 7.60  | 0.14 | 0.98 | 0.08 | 0.10 | 0.05 | 0.01 | 0.00 | 0.15 | N.D | N.D | 0.09 | N.D  | 0.00 | 9.20  |
| 581 | Organic Happy<br>Baby 301         | Fruits                                        | 83.24 | cluster1 | 8.21  | 0.20 | 3.52 | 0.15 | 0.16 | N.D  | 0.01 | N.D  | 0.13 | N.D | N.D | 0.01 | 0.01 | N.D  | 12.39 |
| 582 | Organic Happy<br>Baby 302         | Fruits                                        | 77.47 | cluster1 | 11.03 | 0.06 | 0.14 | 0.11 | 0.16 | N.D  | 0.01 | N.D  | 0.18 | N.D | N.D | 0.08 | N.D  | 0.01 | 11.77 |
| 583 | Organic Happy<br>Baby 304         | Fruits                                        | 78.15 | cluster1 | 8.72  | 0.19 | 2.07 | 0.07 | 0.10 | N.D  | 0.01 | N.D  | 0.16 | N.D | N.D | 0.07 | N.D  | N.D  | 11.38 |
| 584 | Beach-Nut<br>Naturals 309         | Fruits                                        | 79.03 | cluster2 | 6.89  | 0.43 | 0.89 | 0.13 | 0.26 | 0.06 | 0.04 | N.D  | 0.47 | N.D | N.D | 0.05 | N.D  | 0.01 | 9.23  |
| 585 | Beach-Nut<br>Naturals 310         | Vegetable<br>s                                | 81.96 | cluster2 | 6.40  | 0.16 | 0.18 | 0.08 | 0.11 | N.D  | 0.03 | N.D  | 0.21 | N.D | N.D | N.D  | N.D  | 0.01 | 7.17  |
| 586 | Beach-Nut<br>Naturals 312         | Fruits                                        | 75.33 | cluster2 | 10.96 | 0.10 | 3.57 | 0.05 | 0.08 | N.D  | 0.01 | N.D  | 0.27 | N.D | N.D | N.D  | N.D  | 0.01 | 15.05 |

|     |                           |            |       |          |       |      |      |      |      |      |      |      |      |      |      |      |      |      |       |
|-----|---------------------------|------------|-------|----------|-------|------|------|------|------|------|------|------|------|------|------|------|------|------|-------|
| 587 | Beach-Nut<br>Naturals 316 | Fruits     | 76.70 | cluster2 | 8.60  | 0.26 | 4.11 | 0.19 | 0.23 | 0.02 | 0.02 | N.D  | 0.28 | N.D  | N.D  | 0.04 | 0.01 | N.D  | 13.74 |
| 588 | Beach-Nut<br>Naturals 317 | Fruits     | 79.40 | cluster2 | 6.74  | 0.18 | 2.46 | 0.03 | 0.21 | N.D  | 0.02 | N.D  | 0.21 | N.D  | N.D  | 0.01 | N.D  | N.D  | 9.87  |
| 589 | Beach-Nut<br>Naturals 322 | Fruits     | 78.69 | cluster2 | 7.33  | 0.23 | 3.28 | 0.43 | 0.15 | 0.01 | 0.01 | N.D  | 0.24 | N.D  | N.D  | 0.07 | 0.01 | N.D  | 11.76 |
| 590 | Plum Organics<br>337      | Vegetables | 87.84 | cluster2 | 6.86  | 0.29 | N.D  | 0.10 | 0.14 | N.D  | 0.03 | N.D  | 0.20 | N.D  | N.D  | N.D  | 0.01 | N.D  | 7.63  |
| 591 | Plum Organics<br>338      | Fruits     | 77.71 | cluster2 | 8.02  | 0.20 | 2.26 | 0.14 | 0.20 | N.D  | 0.02 | N.D  | 0.20 | N.D  | N.D  | 0.01 | N.D  | N.D  | 11.06 |
| 592 | Plum Organics<br>339      | Fruits     | 82.85 | cluster2 | 8.80  | 0.19 | 0.34 | 0.09 | 0.22 | N.D  | 0.03 | N.D  | 0.30 | N.D  | N.D  | 0.02 | N.D  | 0.01 | 10.01 |
| 593 | Plum Organics<br>341      | Fruits     | 83.69 | cluster2 | 10.58 | 0.47 | 3.18 | 0.31 | 0.38 | 0.05 | 0.04 | N.D  | 0.44 | N.D  | N.D  | N.D  | 0.02 | N.D  | 15.48 |
| 594 | Plum Organics<br>345      | Fruits     | 79.26 | cluster2 | 7.73  | 0.26 | 2.85 | 0.09 | 0.16 | 0.01 | 0.01 | N.D  | 0.20 | N.D  | N.D  | 0.10 | 0.02 | N.D  | 11.43 |
| 595 | Plum Organics<br>347      | Fruits     | 82.01 | cluster2 | 7.43  | 0.47 | 3.61 | 0.02 | 0.08 | 0.00 | 0.01 | N.D  | 0.18 | N.D  | N.D  | 0.05 | 0.01 | N.D  | 11.85 |
| 596 | Plum Organics<br>348      | Fruits     | 82.94 | cluster2 | 6.78  | 0.45 | 2.93 | 0.41 | 0.28 | 0.01 | 0.01 | N.D  | 0.15 | N.D  | N.D  | 0.07 | 0.01 | N.D  | 11.11 |
| 597 | Organics 364              | Fruits     | 78.36 | cluster2 | 6.62  | 0.24 | 1.93 | 0.50 | 0.40 | N.D  | 0.01 | N.D  | 0.25 | N.D  | N.D  | 0.11 | N.D  | N.D  | 10.05 |
| 598 | Organics 366              | Fruits     | 77.33 | cluster2 | 9.45  | 0.15 | 1.68 | 0.21 | 0.14 | N.D  | 0.01 | N.D  | 0.27 | 0.01 | 0.00 | 0.10 | N.D  | 0.01 | 12.02 |
| 599 | Pumpkin Tree<br>372       | Fruits     | 75.13 | cluster2 | 10.63 | 0.08 | 2.81 | 0.09 | 0.07 | N.D  | 0.01 | N.D  | 0.28 | N.D  | N.D  | 0.13 | N.D  | 0.01 | 14.10 |
| 600 | Gerber Natural<br>379     | Fruits     | 75.41 | cluster2 | 10.49 | 0.19 | 2.50 | 0.11 | 0.12 | N.D  | 0.01 | N.D  | 0.25 | N.D  | N.D  | 0.12 | N.D  | N.D  | 13.79 |
| 601 | Gerber Natural<br>381     | Fruits     | 76.09 | cluster2 | 9.86  | 0.14 | 1.16 | 0.08 | 0.10 | N.D  | 0.01 | N.D  | 0.25 | N.D  | N.D  | 0.07 | N.D  | 0.00 | 11.66 |
| 602 | Geber Organics<br>389     | Vegetables | 82.50 | cluster2 | 7.12  | 0.14 | 2.32 | 0.04 | 0.07 | N.D  | 0.02 | N.D  | 0.32 | 0.01 | 0.00 | 0.06 | N.D  | 0.01 | 10.13 |
| 603 | Geber Organics<br>399     | Fruits     | 67.37 | cluster2 | 9.24  | 0.13 | 2.22 | 0.07 | 0.12 | 0.11 | 0.01 | 0.00 | 0.29 | N.D  | N.D  | 0.13 | N.D  | 0.01 | 12.33 |
| 604 | Geber Organics<br>400     | Fruits     | 78.83 | cluster2 | 7.79  | 0.12 | 1.94 | 0.28 | 0.23 | 0.01 | 0.01 | N.D  | 0.16 | N.D  | N.D  | N.D  | 0.01 | N.D  | 10.55 |
| 605 | Gerber 404                | Fruits     | 73.19 | cluster2 | 6.47  | 0.28 | 2.09 | 0.56 | 0.21 | N.D  | 0.02 | N.D  | 0.36 | N.D  | N.D  | 0.07 | N.D  | N.D  | 10.05 |
| 606 | Gerber 405                | Fruits     | 77.09 | cluster2 | 10.80 | 0.08 | 2.06 | 0.05 | 0.07 | N.D  | 0.01 | N.D  | 0.28 | N.D  | N.D  | 0.13 | N.D  | 0.01 | 13.48 |
| 607 | Gerber 406                | Fruits     | 79.85 | cluster2 | 6.65  | 1.08 | 2.01 | 0.22 | 0.12 | N.D  | 0.01 | N.D  | 0.26 | N.D  | N.D  | 0.03 | N.D  | N.D  | 10.39 |



|     |                                         |                                   |       |          |       |      |      |      |      |      |      |      |      |      |      |      |     |      |       |
|-----|-----------------------------------------|-----------------------------------|-------|----------|-------|------|------|------|------|------|------|------|------|------|------|------|-----|------|-------|
| 608 | Gerber 410                              | Fruits                            | 82.53 | cluster2 | 7.96  | 0.07 | 1.45 | 0.07 | 0.05 | N.D  | 0.01 | N.D  | 0.19 | N.D  | N.D  | 0.07 | N.D | 0.00 | 9.87  |
| 609 | Gerber 411                              | Vegetables                        | 82.97 | cluster2 | 7.34  | 0.29 | 2.71 | 0.05 | 0.21 | N.D  | 0.04 | N.D  | 0.39 | 0.01 | 0.00 | 0.07 | N.D | 0.01 | 11.13 |
| 610 | Gerber 415                              | Fruits                            | 67.87 | cluster2 | 11.36 | 0.61 | 1.28 | 1.14 | 0.91 | N.D  | 0.05 | N.D  | 0.45 | N.D  | N.D  | 0.06 | N.D | 0.02 | 15.89 |
| 611 | Gerber 416                              | Fruits                            | 79.83 | cluster2 | 9.68  | 0.29 | 1.26 | 0.44 | 0.33 | N.D  | 0.01 | N.D  | 0.17 | N.D  | N.D  | 0.12 | N.D | 0.01 | 12.31 |
| 612 | Gerber 417                              | Fruits                            | 82.62 | cluster2 | 6.34  | 0.21 | 1.56 | 0.28 | 0.18 | N.D  | 0.02 | N.D  | 0.26 | N.D  | N.D  | 0.05 | N.D | 0.01 | 8.90  |
| 613 | Red lentil fusili                       | Beans, Peas, Legumes, Nuts, Seeds | 59.82 | cluster2 | 13.73 | 0.59 | N.D  | 0.06 | 0.52 | N.D  | 0.03 | N.D  | 0.09 | 0.02 | 0.01 | N.D  | N.D | 0.04 | 15.08 |
| 614 | Scottish oatmeal                        | Grain Products                    | 77.99 | cluster2 | 12.46 | 0.07 | 0.07 | 0.19 | 0.39 | 0.01 | 0.00 | 0.00 | 0.00 | N.D  | N.D  | 0.04 | N.D | 0.01 | 13.25 |
| 615 | Hot cereal oat bran                     | Grain Products                    | 82.84 | cluster2 | 7.36  | 0.07 | 0.05 | 0.12 | 0.33 | 0.01 | 0.00 | 0.00 | 0.00 | N.D  | N.D  | 0.02 | N.D | 0.01 | 7.97  |
| 616 | Hot cereal whole grain creamy buckwheat | Grain Products                    | 81.18 | cluster2 | 11.23 | 0.16 | 0.07 | 0.03 | 0.23 | 0.01 | 0.01 | 0.00 | 0.01 | N.D  | N.D  | 0.01 | N.D | 0.01 | 11.77 |
| 617 | Steel cut whole grain oats              | Grain Products                    | 75.37 | cluster2 | 12.71 | 0.08 | 0.10 | 0.16 | 0.29 | 0.01 | 0.00 | 0.00 | 0.00 | N.D  | N.D  | 0.02 | N.D | 0.02 | 13.40 |
| 618 | Quick Whole grain rolled oats           | Grain Products                    | 78.15 | cluster2 | 13.51 | 0.10 | 0.10 | 0.14 | 0.21 | 0.01 | 0.00 | 0.00 | 0.00 | N.D  | N.D  | 0.02 | N.D | 0.01 | 14.09 |
| 619 | Peanut butter (MaraNatha)               | Beans, Peas, Legumes, Nuts, Seeds | 0.30  | cluster2 | 6.88  | 0.69 | 1.19 | 0.31 | 2.61 | 0.10 | 0.05 | 0.01 | 0.09 | N.D  | N.D  | 0.07 | N.D | 0.04 | 12.03 |
| 620 | Cashew butter (Artisana Organics)       | Beans, Peas, Legumes, Nuts, Seeds | 1.21  | cluster2 | 13.46 | 0.60 | 1.01 | 0.66 | 0.61 | 0.06 | 0.03 | 0.00 | 0.06 | N.D  | N.D  | 0.04 | N.D | 0.05 | 16.59 |
| 621 | Cashew butter (Once again)              | Beans, Peas, Legumes,             | 0.12  | cluster2 | 12.24 | 0.43 | 0.87 | 0.13 | 0.72 | 0.07 | 0.02 | 0.00 | 0.06 | N.D  | N.D  | 0.04 | N.D | 0.04 | 14.62 |

|     |                              |                                               |       |          |       |      |      |      |      |      |      |     |      |     |     |      |     |      |       |
|-----|------------------------------|-----------------------------------------------|-------|----------|-------|------|------|------|------|------|------|-----|------|-----|-----|------|-----|------|-------|
|     |                              | Nuts,<br>Seeds                                |       |          |       |      |      |      |      |      |      |     |      |     |     |      |     |      |       |
| 622 | Kale snacks                  | Vegetable<br>s                                | 2.03  | cluster2 | 11.24 | 1.40 | N.D  | 0.50 | 1.50 | N.D  | 0.26 | N.D | 1.75 | N.D | N.D | 0.36 | N.D | 0.06 | 17.07 |
| 623 | Cashew                       | Beans,<br>Peas,<br>Legumes,<br>Nuts,<br>Seeds | 3.15  | cluster2 | 11.45 | 0.74 | 0.80 | 0.11 | 0.65 | 0.04 | 0.02 | N.D | 0.04 | N.D | N.D | 0.02 | N.D | 0.04 | 13.90 |
| 624 | Black bean<br>vegetable soup | Beans,<br>Peas,<br>Legumes,<br>Nuts,<br>Seeds | 83.07 | cluster2 | 9.00  | 0.69 | 0.34 | 0.25 | 0.71 | N.D  | 0.04 | N.D | 0.21 | N.D | N.D | 0.08 | N.D | 0.02 | 11.34 |
| 625 | Split pea soup               | Beans,<br>Peas,<br>Legumes,<br>Nuts,<br>Seeds | 87.97 | cluster2 | 6.35  | 0.51 | 0.18 | 0.03 | 0.39 | N.D  | 0.02 | N.D | 0.12 | N.D | N.D | 0.00 | N.D | 0.02 | 7.62  |
| 626 | Vegetable soup               | Vegetable<br>s                                | 84.98 | cluster2 | 7.41  | 0.27 | 0.08 | 0.11 | 0.33 | N.D  | 0.02 | N.D | 0.18 | N.D | N.D | 0.05 | N.D | 0.02 | 8.48  |
| 627 | Frozen whole<br>cherry       | Fruits                                        | 79.20 | cluster2 | 6.81  | 0.23 | 0.37 | 0.07 | 0.41 | N.D  | 0.10 | N.D | 0.41 | N.D | N.D | 0.06 | N.D | 0.01 | 8.46  |
| 628 | Frozen mango<br>flesh        | Fruits                                        | 81.22 | cluster2 | 9.51  | 0.14 | 0.28 | 0.08 | 0.17 | N.D  | 0.02 | N.D | 0.24 | N.D | N.D | 0.03 | N.D | 0.01 | 10.48 |
| 629 | Frozen<br>pineapple flesh    | Fruits                                        | 83.42 | cluster2 | 7.30  | 0.22 | 0.31 | 0.23 | 0.17 | N.D  | 0.01 | N.D | 0.03 | N.D | N.D | 0.06 | N.D | 0.01 | 8.33  |
| 630 | Frozen corn                  | Vegetable<br>s                                | 75.57 | cluster2 | 9.07  | 0.27 | 0.95 | 0.23 | 0.26 | N.D  | 0.01 | N.D | 0.03 | N.D | N.D | N.D  | N.D | 0.02 | 10.84 |
| 631 | Pomegranate<br>w/ seeds      | Fruits                                        | 75.43 | cluster2 | 8.71  | 0.22 | 1.15 | 0.04 | 0.23 | N.D  | 0.04 | N.D | 0.26 | N.D | N.D | N.D  | N.D | 0.01 | 10.66 |
| 632 | Black bean<br>burger patty   | Beans,<br>Peas,<br>Legumes,<br>Nuts,<br>Seeds | 43.72 | cluster2 | 14.92 | 1.04 | 1.22 | 0.31 | 1.30 | N.D  | 0.09 | N.D | 0.44 | N.D | N.D | N.D  | N.D | 0.04 | 19.36 |

|     |                                                               |                                   |       |          |       |      |      |      |      |      |      |      |      |     |     |      |     |      |       |
|-----|---------------------------------------------------------------|-----------------------------------|-------|----------|-------|------|------|------|------|------|------|------|------|-----|-----|------|-----|------|-------|
| 633 | Pea protein burger patty                                      | Beans, Peas, Legumes, Nuts, Seeds | 36.28 | cluster2 | 7.15  | 0.65 | 0.85 | 0.13 | 0.59 | N.D  | 0.02 | N.D  | 0.11 | N.D | N.D | N.D  | N.D | 0.07 | 9.57  |
| 634 | Cauliflower burger patty                                      | Beans, Peas, Legumes, Nuts, Seeds | 39.89 | cluster2 | 6.64  | 1.27 | 0.89 | 0.19 | 0.74 | N.D  | 0.06 | N.D  | 0.33 | N.D | N.D | N.D  | N.D | 0.05 | 10.17 |
| 635 | Mixed seed burger patty                                       | Grain Products                    | 45.05 | cluster2 | 8.59  | 0.35 | 0.43 | 0.12 | 0.28 | N.D  | 0.04 | N.D  | 0.15 | N.D | N.D | N.D  | N.D | 0.02 | 9.99  |
| 636 | Beet and bean burger patty                                    | Beans, Peas, Legumes, Nuts, Seeds | 49.80 | cluster2 | 13.25 | 0.63 | 0.19 | 0.18 | 0.61 | N.D  | 0.04 | N.D  | 0.27 | N.D | N.D | N.D  | N.D | 0.02 | 15.18 |
| 637 | Mixed vegetable burger patty                                  | Vegetables                        | 47.16 | cluster2 | 13.83 | 1.24 | 0.25 | 0.26 | 0.43 | N.D  | 0.05 | N.D  | 0.34 | N.D | N.D | N.D  | N.D | 0.03 | 16.44 |
| 638 | Bean and corn burger patty                                    | Grain Products                    | 39.93 | cluster2 | 11.88 | 0.39 | 0.16 | 0.17 | 0.59 | N.D  | 0.05 | N.D  | 0.25 | N.D | N.D | N.D  | N.D | 0.02 | 13.49 |
| 639 | Whole grain millet sweet potato and leafy greens burger patty | Grain Products                    | 39.69 | cluster2 | 11.78 | 0.24 | 0.20 | 0.11 | 0.13 | N.D  | 0.03 | N.D  | 0.09 | N.D | N.D | N.D  | N.D | 0.01 | 12.58 |
| 640 | Cream of Mushroom Soup (Pacific Foods)                        | Vegetables                        | 89.50 | cluster2 | 7.73  | 0.20 | 0.10 | 0.00 | 0.03 | 0.00 | 0.00 | 0.00 | 0.00 | N.D | N.D | 0.03 | N.D | 0.00 | 8.10  |
| 641 | Cream of Chicken Soup                                         | Meat, Poultry, Fish, and Mixtures | 86.53 | cluster2 | 6.81  | 0.15 | 0.04 | 0.00 | 0.02 | 0.00 | 0.00 | 0.00 | 0.00 | N.D | N.D | 0.01 | N.D | 0.01 | 7.04  |
| 642 | Vegan Split Pea Soup                                          | Beans, Peas,                      | 79.26 | cluster2 | 9.97  | 0.61 | 0.25 | 0.03 | 0.56 | 0.02 | 0.03 | 0.01 | 0.20 | N.D | N.D | 0.08 | N.D | 0.02 | 11.77 |

|     |                                            |                                               |       |          |       |      |      |      |      |      |      |      |      |      |     |      |     |      |       |
|-----|--------------------------------------------|-----------------------------------------------|-------|----------|-------|------|------|------|------|------|------|------|------|------|-----|------|-----|------|-------|
|     |                                            | Legumes,<br>Nuts,<br>Seeds                    |       |          |       |      |      |      |      |      |      |      |      |      |     |      |     |      |       |
| 643 | 13 Beans Soup Mix                          | Beans,<br>Peas,<br>Legumes,<br>Nuts,<br>Seeds | 78.27 | cluster2 | 7.82  | 0.78 | 0.22 | 0.18 | 3.06 | 0.03 | 0.02 | 0.01 | 0.02 | N.D  | N.D | 0.11 | N.D | 0.02 | 12.27 |
| 644 | Frozen Whole Sweet Green Peas (Flav R Pac) | Beans,<br>Peas,<br>Legumes,<br>Nuts,<br>Seeds | 78.26 | cluster2 | 6.85  | 0.24 | 0.94 | 0.05 | 0.78 | 0.02 | 0.03 | 0.00 | 0.15 | N.D  | N.D | N.D  | N.D | 0.04 | 9.10  |
| 645 | Frozen Sweet Peas (Cascadian)              | Beans,<br>Peas,<br>Legumes,<br>Nuts,<br>Seeds | 77.52 | cluster2 | 11.90 | 0.38 | 4.23 | 0.23 | 1.07 | 0.02 | 0.03 | 0.00 | 0.17 | N.D  | N.D | 0.00 | N.D | 0.04 | 18.07 |
| 646 | Frozen Whole Green Peas (Signature Select) | Beans,<br>Peas,<br>Legumes,<br>Nuts,<br>Seeds | 56.14 | cluster2 | 11.62 | 0.55 | 0.17 | 0.15 | 1.63 | 0.06 | 0.07 | 0.00 | 0.31 | N.D  | N.D | 0.01 | N.D | 0.07 | 14.65 |
| 647 | Frozen Whole Green Peas (Stahlbush)        | Beans,<br>Peas,<br>Legumes,<br>Nuts,<br>Seeds | 76.79 | cluster2 | 6.51  | 0.29 | 0.29 | 0.06 | 0.61 | 0.03 | 0.03 | 0.00 | 0.14 | N.D  | N.D | N.D  | N.D | 0.04 | 8.01  |
| 648 | Refried Beans                              | Beans,<br>Peas,<br>Legumes,<br>Nuts,<br>Seeds | 78.39 | cluster2 | 7.27  | 0.41 | 0.23 | 0.23 | 0.85 | 0.06 | 0.02 | 0.01 | 0.05 | 0.01 | N.D | 0.11 | N.D | 0.01 | 9.26  |
| 649 | Vanilla bean ice cream                     | Milk and<br>Milk<br>Products                  | 56.70 | cluster2 | 9.26  | 1.74 | 0.73 | 0.00 | 0.02 | 0.06 | 0.00 | 0.00 | 0.00 | N.D  | N.D | 0.18 | N.D | 0.01 | 12.01 |

|     |                             |                                   |       |          |       |      |      |      |      |      |      |      |      |      |      |      |      |      |       |
|-----|-----------------------------|-----------------------------------|-------|----------|-------|------|------|------|------|------|------|------|------|------|------|------|------|------|-------|
| 650 | Vanilla rice drink          | Grain Products                    | 88.97 | cluster2 | 8.12  | 0.05 | 0.06 | 0.01 | 0.02 | 0.00 | 0.00 | 0.00 | 0.00 | 0.00 | N.D  | 0.00 | N.D  | 0.00 | 8.27  |
| 651 | Enriched rice drink         | Grain Products                    | 89.38 | cluster2 | 7.56  | 0.05 | 0.06 | 0.00 | 0.01 | 0.00 | 0.00 | 0.00 | 0.00 | 0.00 | N.D  | 0.00 | N.D  | 0.00 | 7.68  |
| 652 | Enriched vanilla rice drink | Grain Products                    | 87.81 | cluster2 | 7.66  | 0.05 | 0.06 | 0.00 | 0.02 | 0.00 | 0.00 | 0.00 | 0.00 | 0.00 | N.D  | 0.01 | N.D  | 0.00 | 7.80  |
| 653 | Tomato Ketchup              | Vegetables                        | 58.93 | cluster2 | 12.65 | 0.21 | 2.70 | 0.02 | 0.05 | N.D  | 0.02 | N.D  | 0.27 | 0.02 | N.D  | N.D  | N.D  | 0.00 | 15.95 |
| 654 | Refried Beans               | Beans, Peas, Legumes, Nuts, Seeds | 73.17 | cluster2 | 8.48  | 0.50 | 0.18 | 0.23 | 0.91 | 0.05 | 0.03 | 0.01 | 0.06 | 0.00 | N.D  | 0.15 | 0.00 | 0.02 | 10.63 |
| 655 | Cannellini Beans            | Beans, Peas, Legumes, Nuts, Seeds | 74.85 | cluster2 | 8.20  | 0.66 | 0.16 | 0.21 | 0.80 | 0.06 | 0.03 | 0.00 | 0.22 | 0.01 | N.D  | 0.12 | N.D  | 0.02 | 10.51 |
| 656 | Refried black beans         | Beans, Peas, Legumes, Nuts, Seeds | 73.04 | cluster2 | 8.20  | 0.48 | 0.17 | 0.26 | 0.93 | 0.05 | 0.03 | 0.01 | 0.08 | 0.00 | 0.00 | 0.14 | 0.00 | 0.02 | 10.37 |
| 657 | Almond butter protein bar   | Beans, Peas, Legumes, Nuts, Seeds | 4.07  | cluster2 | 11.33 | 2.43 | 1.12 | 0.27 | 1.25 | 0.04 | 0.07 | 0.00 | 0.11 | 0.01 | N.D  | 0.10 | N.D  | 0.04 | 16.79 |
| 658 | Peanut butter protein bar   | Beans, Peas, Legumes, Nuts, Seeds | 1.27  | cluster2 | 12.40 | 3.19 | 2.35 | 0.30 | 1.04 | 0.05 | 0.05 | 0.01 | 0.06 | 0.01 | N.D  | 0.10 | N.D  | 0.04 | 19.59 |
| 659 | Unsweetened pitted prunes   | Fruits                            | 8.94  | cluster2 | 13.36 | 1.49 | 2.05 | 0.16 | 0.78 | 0.09 | 0.11 | N.D  | 1.39 | N.D  | N.D  | 0.28 | N.D  | 0.01 | 19.71 |

|     |                                             |                                   |       |          |       |      |       |      |      |      |      |      |      |      |      |      |     |      |       |
|-----|---------------------------------------------|-----------------------------------|-------|----------|-------|------|-------|------|------|------|------|------|------|------|------|------|-----|------|-------|
| 660 | Rice ramen                                  | Grain Products                    | 82.72 | cluster2 | 13.55 | 0.08 | 0.11  | 0.05 | 0.11 | 0.00 | 0.00 | 0.00 | 0.00 | 0.00 | N.D  | 0.01 | N.D | 0.01 | 13.92 |
| 661 | Chickpea mac & cheese pasta                 | Beans, Peas, Legumes, Nuts, Seeds | 74.67 | cluster2 | 14.51 | 0.77 | 0.11  | 0.07 | 0.82 | 0.01 | 0.02 | 0.01 | 0.03 | 0.00 | N.D  | 0.08 | N.D | 0.01 | 16.44 |
| 662 | Whole double fiber bread                    | Grain Products                    | 27.15 | cluster2 | 34.98 | 0.21 | 0.35  | 1.45 | 1.18 | 0.10 | 0.01 | 0.01 | 0.01 | N.D  | N.D  | 0.14 | N.D | 0.04 | 38.48 |
| 663 | Whole whole grain bread                     | Grain Products                    | 26.86 | cluster2 | 30.38 | 0.49 | 0.24  | 1.03 | 1.95 | 0.11 | 0.01 | 0.01 | 0.02 | N.D  | N.D  | 0.15 | N.D | 0.04 | 34.45 |
| 664 | Inside only Whole grain bread               | Grain Products                    | 26.54 | cluster2 | 32.55 | 0.43 | 0.30  | 1.06 | 2.00 | 0.08 | 0.01 | 0.01 | 0.02 | N.D  | N.D  | 0.15 | N.D | 0.04 | 36.65 |
| 665 | Whole Whole Grains English muffin (Oroweat) | Grain Products                    | 28.54 | cluster2 | 32.94 | 0.11 | 0.50  | 0.59 | 0.63 | 0.09 | 0.00 | 0.00 | N.D  | N.D  | N.D  | 0.14 | N.D | 0.04 | 35.05 |
| 666 | Whole Double Fiber English muffin (Oroweat) | Grain Products                    | 31.95 | cluster2 | 34.30 | 0.11 | 0.55  | 0.92 | 0.90 | 0.08 | 0.00 | 0.01 | N.D  | N.D  | N.D  | 0.13 | N.D | 0.03 | 37.04 |
| 667 | Yellow corn tortilla                        | Grain Products                    | 41.64 | cluster2 | 28.10 | 0.44 | 0.16  | 0.45 | 0.66 | 0.01 | 0.00 | N.D  | 0.01 | N.D  | N.D  | 0.18 | N.D | 0.02 | 30.02 |
| 668 | White corn tortilla                         | Grain Products                    | 42.66 | cluster2 | 30.55 | 0.45 | 0.18  | 0.38 | 0.65 | 0.03 | 0.00 | N.D  | 0.01 | N.D  | N.D  | 0.16 | N.D | 0.02 | 32.43 |
| 669 | Whole wheat tortilla                        | Grain Products                    | 30.83 | cluster2 | 30.62 | N.D  | 0.20  | 0.97 | 1.14 | 0.03 | 0.00 | N.D  | 0.01 | N.D  | N.D  | 0.06 | N.D | 0.03 | 33.05 |
| 670 | Raspberry jam (Bonne Maman)                 | Fruits                            | 30.62 | cluster2 | 27.15 | 0.06 | 10.89 | 0.11 | 0.08 | N.D  | 0.02 | N.D  | 0.26 | N.D  | N.D  | N.D  | N.D | 0.01 | 38.59 |
| 671 | Orange jam (Bonne Maman)                    | Sugars, Sweets, and Beverages     | 27.88 | cluster2 | 32.72 | 0.13 | 13.28 | 0.06 | 0.08 | N.D  | 0.05 | N.D  | 0.23 | 0.06 | 0.02 | N.D  | N.D | 0.01 | 46.65 |
| 672 | Fig jam (Bonne Maman)                       | Fruits                            | 31.16 | cluster2 | 34.36 | 0.04 | 13.60 | 0.02 | 0.07 | N.D  | 0.02 | N.D  | 0.28 | 0.04 | 0.02 | N.D  | N.D | 0.01 | 48.46 |

|     |                                  |                                               |       |          |       |      |       |      |      |      |      |      |      |      |      |      |      |      |       |
|-----|----------------------------------|-----------------------------------------------|-------|----------|-------|------|-------|------|------|------|------|------|------|------|------|------|------|------|-------|
| 673 | Strawberry jam<br>(Bonne Maman)  | Fruits                                        | 29.61 | cluster2 | 30.28 | 0.05 | 12.29 | 0.05 | 0.05 | N.D  | 0.01 | N.D  | 0.07 | 0.03 | 0.01 | N.D  | N.D  | 0.01 | 42.84 |
| 674 | Plum jam<br>(Bonne Maman)        | Fruits                                        | 27.68 | cluster2 | 30.76 | 0.06 | 10.38 | 0.03 | 0.05 | N.D  | 0.01 | N.D  | 0.08 | 0.05 | 0.02 | N.D  | N.D  | 0.01 | 41.45 |
| 675 | Mango Peach<br>jam (Bonne Maman) | Fruits                                        | 27.48 | cluster2 | 28.88 | 0.09 | 11.70 | 0.06 | 0.13 | N.D  | 0.02 | N.D  | 0.27 | N.D  | N.D  | N.D  | N.D  | 0.01 | 41.16 |
| 676 | Nutella spread                   | Beans,<br>Peas,<br>Legumes,<br>Nuts,<br>Seeds | 0.20  | cluster2 | 31.83 | 2.96 | 15.25 | 0.09 | 0.41 | N.D  | 0.04 | N.D  | 0.20 | N.D  | N.D  | 0.20 | 0.01 | N.D  | 51.00 |
| 677 | Baking flour                     | Beans,<br>Peas,<br>Legumes,<br>Nuts,<br>Seeds | 9.09  | cluster2 | 27.39 | 0.41 | 0.39  | 0.15 | 1.73 | 0.09 | 0.05 | 0.01 | 0.09 | N.D  | N.D  | 2.06 | N.D  | 0.03 | 32.40 |
| 678 | Brown Rice<br>(Minute)           | Grain<br>Products                             | 58.79 | cluster2 | 33.54 | 0.10 | 0.19  | 0.13 | 0.25 | 0.02 | 0.00 | 0.00 | 0.01 | N.D  | N.D  | 0.02 | N.D  | 0.02 | 34.27 |
| 679 | 7 grains mix                     | Grain<br>Products                             | 59.44 | cluster2 | 31.11 | 0.32 | 0.05  | 0.84 | 0.52 | N.D  | 0.01 | N.D  | N.D  | N.D  | N.D  | 0.04 | N.D  | N.D  | 32.89 |
| 680 | Grains and<br>vegetable mix      | Grain<br>Products                             | 64.75 | cluster2 | 33.15 | 0.37 | N.D   | 0.10 | 0.23 | N.D  | 0.00 | N.D  | N.D  | N.D  | N.D  | 0.02 | N.D  | N.D  | 33.87 |
| 681 | Spaghetti                        | Grain<br>Products                             | 56.20 | cluster2 | 27.73 | 0.20 | 0.14  | 0.35 | 0.62 | 0.02 | 0.00 | 0.00 | 0.00 | N.D  | N.D  | 0.04 | N.D  | 0.02 | 29.12 |
| 682 | Whole wheat<br>spaghetti         | Grain<br>Products                             | 64.20 | cluster2 | 32.76 | 0.17 | N.D   | 0.05 | 0.10 | N.D  | 0.00 | N.D  | 0.00 | N.D  | N.D  | 0.05 | N.D  | N.D  | 33.13 |
| 683 | Whole grain<br>amaranth          | Grain<br>Products                             | 58.95 | cluster2 | 28.53 | 0.40 | N.D   | 0.23 | 0.72 | N.D  | 0.10 | N.D  | 0.42 | N.D  | N.D  | 0.05 | N.D  | 0.04 | 30.49 |
| 684 | Whole grain<br>khorasan<br>kamut | Grain<br>Products                             | 51.68 | cluster2 | 30.05 | 0.16 | 0.25  | 0.61 | 0.84 | 0.02 | 0.00 | 0.00 | 0.00 | N.D  | N.D  | 0.04 | N.D  | 0.02 | 32.01 |
| 685 | Brown rice hot<br>cereal         | Grain<br>Products                             | 64.70 | cluster2 | 29.07 | 0.14 | 0.28  | 0.10 | 0.27 | 0.01 | 0.00 | 0.00 | 0.00 | N.D  | N.D  | 0.03 | N.D  | 0.01 | 29.91 |

|     |                                        |                |       |          |       |      |      |      |      |      |      |      |      |     |     |      |     |      |       |
|-----|----------------------------------------|----------------|-------|----------|-------|------|------|------|------|------|------|------|------|-----|-----|------|-----|------|-------|
| 686 | Beet chips                             | Vegetables     | 0.48  | cluster2 | 28.68 | 1.68 | 1.54 | 4.24 | 4.00 | N.D  | 0.37 | N.D  | 1.41 | N.D | N.D | 0.30 | N.D | 0.08 | 42.30 |
| 687 | Freeze dried strawberry                | Fruits         | 0.90  | cluster2 | 33.28 | 1.88 | 5.04 | 0.74 | 0.88 | N.D  | 0.14 | N.D  | 1.96 | N.D | N.D | 0.02 | N.D | 0.07 | 44.01 |
| 688 | Freeze dried pineapple rings           | Fruits         | 9.37  | cluster2 | 31.00 | 1.07 | 1.27 | 1.30 | 0.93 | N.D  | 0.03 | N.D  | 0.27 | N.D | N.D | 0.61 | N.D | 0.03 | 36.52 |
| 689 | Dried coconut strips                   | Fruits         | 2.51  | cluster2 | 33.51 | 1.10 | 1.10 | N.D  | 0.18 | N.D  | 0.04 | N.D  | 0.08 | N.D | N.D | 2.67 | N.D | 0.01 | 38.69 |
| 690 | Dried watermelon                       | Fruits         | 3.31  | cluster2 | 29.13 | 0.55 | 7.23 | 0.35 | 0.46 | N.D  | 0.07 | N.D  | 0.86 | N.D | N.D | 0.46 | N.D | 0.04 | 39.15 |
| 691 | Multigrain bread (Trade Joes)          | Grain Products | 36.69 | cluster2 | 33.11 | N.D  | 0.69 | 0.67 | 1.75 | 0.03 | 0.00 | 0.00 | 0.01 | N.D | N.D | 0.12 | N.D | 0.03 | 36.41 |
| 692 | Sprouted wheat bread (Silver Hills)    | Grain Products | 37.21 | cluster2 | 31.65 | N.D  | 0.70 | 0.85 | 1.64 | 0.03 | 0.00 | 0.00 | 0.01 | N.D | N.D | 0.12 | N.D | 0.03 | 35.04 |
| 693 | Buckwheat Molasses bread               | Grain Products | 33.11 | cluster2 | 33.02 | N.D  | 0.54 | 0.46 | 1.53 | 0.05 | 0.04 | 0.03 | 0.03 | N.D | N.D | 0.37 | N.D | 0.03 | 36.11 |
| 694 | Millet and chia bread                  | Grain Products | 30.05 | cluster2 | 31.64 | N.D  | 0.90 | 0.28 | 0.73 | 0.04 | 0.02 | 0.01 | 0.02 | N.D | N.D | 0.20 | N.D | 0.03 | 33.87 |
| 695 | Sprouted grain bread                   | Grain Products | 38.35 | cluster2 | 32.23 | N.D  | 0.80 | 0.82 | 1.40 | 0.03 | 0.00 | 0.00 | 0.01 | N.D | N.D | 0.15 | N.D | 0.03 | 35.47 |
| 696 | Whole grain bread (Artisan Bakers)     | Grain Products | 34.82 | cluster2 | 30.94 | N.D  | 0.35 | 0.52 | 1.01 | 0.04 | 0.00 | 0.00 | 0.01 | N.D | N.D | 0.14 | N.D | 0.03 | 33.06 |
| 697 | Multigrain bread (Alvarado St. Bakery) | Grain Products | 37.31 | cluster2 | 31.06 | N.D  | 0.55 | 0.66 | 1.48 | 0.03 | 0.00 | 0.00 | 0.00 | N.D | N.D | 0.12 | N.D | 0.03 | 33.94 |
| 698 | Whole grain bread (Happy Campers)      | Grain Products | 41.17 | cluster2 | 32.82 | 0.27 | 0.23 | 0.34 | 1.03 | 0.03 | 0.04 | 0.03 | 0.02 | N.D | N.D | 0.34 | N.D | 0.03 | 35.19 |
| 699 | Sesame bread                           | Grain Products | 38.99 | cluster2 | 27.63 | 0.56 | 0.21 | 0.85 | 1.92 | 0.02 | 0.01 | 0.01 | 0.01 | N.D | N.D | 0.11 | N.D | 0.03 | 31.36 |
| 700 | Flax bread (Udls)                      | Grain Products | 30.14 | cluster2 | 32.62 | 0.50 | 0.55 | 0.16 | 0.54 | 0.08 | 0.03 | 0.01 | 0.05 | N.D | N.D | 0.28 | N.D | 0.03 | 34.84 |



|     |                                    |                                   |       |          |       |      |      |      |      |      |      |      |      |      |     |      |     |      |       |
|-----|------------------------------------|-----------------------------------|-------|----------|-------|------|------|------|------|------|------|------|------|------|-----|------|-----|------|-------|
| 701 | Sprouted wheat bread (Trader Joes) | Grain Products                    | 36.66 | cluster2 | 31.86 | 0.19 | 0.30 | 0.86 | 2.11 | 0.02 | 0.00 | 0.01 | 0.00 | N.D  | N.D | 0.12 | N.D | 0.03 | 35.51 |
| 702 | Mini Cheddar Cheese Biscuit        | Grain Products                    | 0.15  | cluster2 | 32.59 | 2.05 | 0.40 | 0.24 | 0.38 | 0.01 | 0.00 | 0.00 | 0.00 | N.D  | N.D | 0.09 | N.D | 0.02 | 35.79 |
| 703 | Flax Plus Waffle                   | Grain Products                    | 34.07 | cluster2 | 31.40 | 0.59 | 0.28 | 0.38 | 0.45 | 0.05 | 0.01 | 0.00 | 0.02 | N.D  | N.D | 0.07 | N.D | 0.01 | 33.27 |
| 704 | Maple syrup                        | Sugars, Sweets, and Beverages     | 27.05 | cluster2 | 31.85 | 0.03 | 3.72 | 0.01 | 0.07 | 0.21 | 0.00 | 0.00 | 0.00 | N.D  | N.D | 0.07 | N.D | 0.00 | 35.95 |
| 705 | Honey                              | Sugars, Sweets, and Beverages     | 25.08 | cluster2 | 28.66 | 0.05 | 6.09 | 0.00 | 0.13 | 0.11 | 0.00 | 0.00 | 0.00 | N.D  | N.D | 0.05 | N.D | 0.00 | 35.10 |
| 706 | Wheat bran cereal                  | Grain Products                    | 2.77  | cluster2 | 28.65 | 0.65 | 1.27 | 2.41 | 2.13 | 0.02 | 0.02 | 0.02 | 0.02 | 0.00 | N.D | 0.14 | N.D | 0.06 | 35.39 |
| 707 | Whole wheat bread                  | Grain Products                    | 30.57 | cluster2 | 32.32 | 0.46 | 0.61 | 1.61 | 0.83 | 0.01 | 0.01 | 0.01 | 0.01 | 0.00 | N.D | 0.16 | N.D | 0.02 | 36.06 |
| 708 | Sprouted whole grain bread         | Grain Products                    | 30.05 | cluster2 | 32.57 | 0.48 | 0.73 | 1.37 | 0.77 | 0.01 | 0.01 | 0.01 | 0.01 | 0.00 | N.D | 0.18 | N.D | 0.03 | 36.15 |
| 709 | Whole grains and seeds bread       | Grain Products                    | 38.01 | cluster2 | 30.30 | 0.36 | 0.82 | 1.20 | 0.91 | 0.01 | 0.01 | 0.01 | 0.01 | 0.00 | N.D | 0.15 | N.D | 0.02 | 33.80 |
| 710 | Stir fry rice noodle               | Grain Products                    | 62.27 | cluster2 | 31.74 | 0.20 | 0.19 | 0.03 | 0.08 | 0.00 | 0.00 | 0.00 | 0.00 | 0.00 | N.D | 0.02 | N.D | 0.01 | 32.28 |
| 711 | Chicken breast tender              | Meat, Poultry, Fish, and Mixtures | 52.24 | cluster2 | 32.74 | 0.20 | 0.32 | 0.03 | 0.10 | 0.01 | 0.00 | 0.01 | 0.01 | 0.00 | N.D | 0.04 | N.D | 0.12 | 33.58 |
| 712 | Short grain brown rice             | Grain Products                    | 56.42 | cluster2 | 33.19 | 0.16 | 0.22 | 0.07 | 0.12 | 0.01 | 0.00 | 0.00 | 0.00 | 0.00 | N.D | 0.04 | N.D | 0.01 | 33.82 |
| 713 | Whole buttermilk bread             | Grain Products                    | 26.00 | cluster3 | 46.83 | 1.18 | 0.30 | 0.41 | 0.54 | 0.06 | 0.00 | N.D  | 0.00 | N.D  | N.D | 0.18 | N.D | 0.03 | 49.53 |

|     |                                  |                |       |          |       |      |      |      |      |      |      |      |      |      |      |      |     |      |       |
|-----|----------------------------------|----------------|-------|----------|-------|------|------|------|------|------|------|------|------|------|------|------|-----|------|-------|
| 714 | Whole potato bread               | Grain Products | 26.38 | cluster3 | 48.20 | 0.43 | 0.47 | 0.43 | 0.62 | 0.04 | 0.00 | 0.00 | 0.01 | N.D  | N.D  | 0.16 | N.D | 0.03 | 50.40 |
| 715 | Strawberry Jam (Smuckers)        | Fruits         | 29.61 | cluster3 | 51.44 | 0.09 | 6.75 | 0.05 | 0.07 | N.D  | 0.01 | 0.02 | 0.14 | 0.06 | 0.02 | N.D  | N.D | 0.01 | 58.67 |
| 716 | 7 grain pancake/waffle flour     | Grain Products | 8.98  | cluster3 | 47.13 | 0.32 | 0.43 | 1.34 | 1.94 | 0.04 | 0.01 | 0.02 | 0.01 | N.D  | N.D  | 0.13 | N.D | 0.04 | 51.40 |
| 717 | Freeze dried mango flesh         | Fruits         | 2.59  | cluster3 | 48.51 | 0.83 | 2.77 | 0.41 | 1.04 | N.D  | 0.10 | N.D  | 1.14 | N.D  | N.D  | N.D  | N.D | 0.04 | 54.84 |
| 718 | Whole grain cereal (Trader Joes) | Grain Products | 1.29  | cluster3 | 48.97 | 0.33 | 3.42 | 1.13 | 1.98 | 0.08 | 0.00 | 0.01 | N.D  | N.D  | N.D  | 0.06 | N.D | 0.03 | 56.00 |
| 719 | Puffin cereal (Barbaras)         | Grain Products | 10.21 | cluster3 | 46.93 | 0.20 | 2.19 | 1.05 | 0.74 | 0.06 | 0.01 | 0.01 | N.D  | N.D  | N.D  | 0.07 | N.D | 0.03 | 51.28 |
| 720 | Multigrain crackers              | Grain Products | 1.87  | cluster3 | 51.33 | 0.67 | 2.33 | 0.81 | 1.29 | 0.08 | 0.01 | 0.00 | N.D  | N.D  | N.D  | 0.10 | N.D | 0.03 | 56.65 |
| 721 | Pita chips                       | Grain Products | 0.33  | cluster3 | 48.56 | 0.23 | 0.78 | 1.05 | 1.00 | 0.04 | 0.01 | 0.01 | 0.01 | N.D  | N.D  | 0.11 | N.D | 0.03 | 51.83 |
| 722 | Dried mango (Mariani)            | Fruits         | 2.21  | cluster3 | 44.34 | 0.48 | 4.89 | 0.16 | 0.36 | N.D  | 0.04 | N.D  | 0.81 | N.D  | N.D  | N.D  | N.D | 0.03 | 51.13 |
| 723 | Dried orange slices              | Fruits         | 9.60  | cluster3 | 45.45 | 0.66 | 2.52 | 0.08 | 0.38 | N.D  | 0.13 | N.D  | 0.58 | N.D  | N.D  | 0.26 | N.D | 0.01 | 50.08 |
| 724 | Almond cookies                   | Grain Products | 1.98  | cluster3 | 50.56 | 0.47 | 2.47 | 0.39 | 0.82 | 0.08 | 0.01 | 0.00 | N.D  | N.D  | N.D  | 0.08 | N.D | 0.03 | 54.89 |
| 725 | Chocolate ship cookies           | Grain Products | 2.51  | cluster3 | 44.73 | 0.14 | 3.29 | 0.31 | 0.48 | 0.07 | 0.00 | 0.00 | N.D  | N.D  | N.D  | 0.24 | N.D | 0.02 | 49.29 |
| 726 | Honey graham crackers            | Grain Products | 3.02  | cluster3 | 51.38 | 0.71 | 2.75 | 0.84 | 1.06 | 0.06 | 0.00 | 0.00 | N.D  | N.D  | N.D  | 0.15 | N.D | 0.02 | 56.98 |
| 727 | Golden round crackers            | Grain Products | 3.63  | cluster3 | 49.45 | 0.76 | 1.07 | 0.39 | 0.62 | 0.04 | 0.00 | 0.00 | N.D  | N.D  | N.D  | 0.09 | N.D | 0.02 | 52.45 |
| 728 | Peanut butter crackers           | Grain Products | 2.58  | cluster3 | 49.30 | 0.63 | 1.46 | 0.31 | 0.68 | 0.07 | 0.00 | 0.00 | 0.01 | N.D  | N.D  | 0.07 | N.D | 0.02 | 52.57 |
| 729 | Brown rice bread                 | Grain Products | 41.91 | cluster3 | 46.95 | 0.57 | 0.06 | 0.19 | 0.43 | 0.14 | 0.01 | 0.02 | 0.02 | N.D  | N.D  | 0.24 | N.D | 0.02 | 48.67 |
| 730 | Mini Peanut Butter Biscuit       | Grain Products | 2.05  | cluster3 | 50.64 | 0.44 | 0.46 | 0.36 | 0.73 | 0.05 | 0.02 | 0.00 | 0.02 | N.D  | N.D  | 0.12 | N.D | 0.01 | 52.86 |

|     |                                    |                                               |       |          |       |      |       |      |      |      |      |      |      |      |     |      |     |      |       |
|-----|------------------------------------|-----------------------------------------------|-------|----------|-------|------|-------|------|------|------|------|------|------|------|-----|------|-----|------|-------|
| 731 | Gluten-Free<br>Chia Plus<br>Waffle | Grain<br>Products                             | 31.81 | cluster3 | 48.56 | 0.50 | 0.29  | 0.05 | 0.17 | 0.05 | 0.01 | 0.00 | 0.01 | N.D  | N.D | 0.02 | N.D | 0.01 | 49.68 |
| 732 | Table sugar*                       | Sugars,<br>Sweets,<br>and<br>Beverages        | 0.01  | cluster3 | 46.78 | 0.14 | 38.81 | 0.00 | 0.06 | 0.17 | 0.00 | 0.00 | 0.00 | N.D  | N.D | 0.03 | N.D | 0.00 | 52.91 |
| 733 | Sourdough<br>bread                 | Grain<br>Products                             | 28.31 | cluster3 | 50.60 | 0.53 | 0.48  | 0.67 | 0.62 | 0.02 | 0.00 | 0.00 | 0.00 | N.D  | N.D | 0.09 | N.D | 0.01 | 53.02 |
| 734 | Chickpea<br>veggie crisps          | Beans,<br>Peas,<br>Legumes,<br>Nuts,<br>Seeds | 0.97  | cluster3 | 50.36 | 1.15 | 0.49  | 0.20 | 1.52 | 0.03 | 0.04 | 0.01 | 0.07 | 0.00 | N.D | 0.11 | N.D | 0.05 | 54.02 |
| 735 | Blue corn<br>tortilla chips        | Grain<br>Products                             | 0.49  | cluster3 | 50.88 | 0.43 | 0.48  | 0.51 | 0.71 | 0.01 | 0.01 | 0.01 | 0.02 | 0.00 | N.D | 0.04 | N.D | 0.01 | 53.12 |
| 736 | Tortilla chips                     | Grain<br>Products                             | 1.31  | cluster3 | 51.03 | 0.53 | 0.41  | 0.48 | 0.72 | 0.01 | 0.01 | 0.01 | 0.01 | 0.00 | N.D | 0.05 | N.D | 0.01 | 53.27 |
| 737 | Whole wheat<br>flour               | Grain<br>Products                             | 7.85  | cluster3 | 48.19 | 0.71 | 0.48  | 0.98 | 0.92 | 0.01 | 0.00 | 0.01 | 0.01 | 0.00 | N.D | 0.12 | N.D | 0.03 | 51.45 |
| 738 | Red lentil rotini<br>pasta         | Beans,<br>Peas,<br>Legumes,<br>Nuts,<br>Seeds | 59.84 | cluster3 | 51.09 | 1.14 | 0.42  | 0.14 | 1.22 | 0.02 | 0.03 | 0.01 | 0.03 | 0.00 | N.D | 0.06 | N.D | 0.05 | 54.22 |
| 739 | Almond cereal                      | Grain<br>Products                             | 1.45  | cluster3 | 48.99 | 0.43 | 0.53  | 0.60 | 0.79 | 0.04 | 0.03 | 0.01 | 0.04 | 0.00 | N.D | 0.12 | N.D | 0.03 | 51.62 |
| 740 | Whole white<br>bread               | Grain<br>Products                             | 28.88 | cluster3 | 44.12 | 0.01 | 0.31  | 0.39 | 1.00 | 0.07 | 0.00 | 0.00 | 0.00 | N.D  | N.D | 0.16 | N.D | 0.03 | 46.10 |
| 741 | Crust only<br>whole grain<br>bread | Grain<br>Products                             | 14.99 | cluster3 | 36.72 | 0.24 | 0.32  | 1.47 | 2.83 | 0.06 | 0.02 | 0.02 | 0.03 | N.D  | N.D | 0.22 | N.D | 0.05 | 41.97 |
| 742 | Whole oatnut<br>bread              | Grain<br>Products                             | 20.71 | cluster3 | 37.63 | 0.38 | 0.49  | 0.39 | 0.91 | 0.10 | 0.01 | 0.00 | 0.02 | N.D  | N.D | 0.26 | N.D | 0.04 | 40.24 |
| 743 | Whole Extra<br>Crisp English       | Grain<br>Products                             | 36.14 | cluster3 | 44.33 | 0.08 | 0.40  | 0.35 | 0.64 | 0.04 | 0.00 | 0.00 | N.D  | N.D  | N.D | 0.18 | N.D | 0.03 | 46.06 |

|     |                                              |                                               |       |          |       |      |      |      |      |      |      |      |      |     |     |      |     |      |       |
|-----|----------------------------------------------|-----------------------------------------------|-------|----------|-------|------|------|------|------|------|------|------|------|-----|-----|------|-----|------|-------|
|     | muffin<br>(Oroweat)                          |                                               |       |          |       |      |      |      |      |      |      |      |      |     |     |      |     |      |       |
| 744 | Whole Original<br>English muffin<br>(Thomas) | Grain<br>Products                             | 27.90 | cluster3 | 45.81 | 0.15 | 0.53 | 0.41 | 0.55 | 0.06 | 0.00 | 0.00 | N.D  | N.D | N.D | 0.12 | N.D | 0.02 | 47.65 |
| 745 | Whole Light<br>Multi Grain<br>English muffin | Grain<br>Products                             | 31.76 | cluster3 | 36.76 | 0.23 | 0.24 | 0.48 | 0.46 | 0.02 | 0.00 | N.D  | N.D  | N.D | N.D | 0.12 | N.D | 0.03 | 38.35 |
| 746 | Flour tortilla                               | Grain<br>Products                             | 31.22 | cluster3 | 36.49 | 0.22 | 0.26 | 0.39 | 0.52 | 0.03 | 0.00 | N.D  | N.D  | N.D | N.D | 0.16 | N.D | 0.02 | 38.10 |
| 747 | Brown Rice<br>(Organics)                     | Grain<br>Products                             | 55.48 | cluster3 | 37.86 | 0.30 | N.D  | 0.11 | 0.15 | N.D  | 0.00 | N.D  | 0.01 | N.D | N.D | 0.01 | N.D | N.D  | 38.44 |
| 748 | White rice<br>(Minute)                       | Grain<br>Products                             | 59.49 | cluster3 | 37.61 | 0.24 | N.D  | 0.05 | 0.08 | N.D  | 0.00 | N.D  | 0.01 | N.D | N.D | 0.02 | N.D | N.D  | 38.02 |
| 749 | Whole wheat<br>penne rigate                  | Grain<br>Products                             | 54.68 | cluster3 | 38.40 | 0.34 | 0.30 | 1.40 | 1.01 | N.D  | 0.01 | 0.01 | 0.02 | N.D | N.D | 0.10 | N.D | 0.02 | 41.61 |
| 750 | Raisin bran<br>cereal                        | Grain<br>Products                             | 3.23  | cluster3 | 44.75 | 0.23 | 1.59 | 1.57 | 1.78 | 0.05 | 0.01 | 0.01 | N.D  | N.D | N.D | 0.08 | N.D | 0.04 | 50.11 |
| 751 | Wheat crackers<br>(Nabisco)                  | Grain<br>Products                             | 1.87  | cluster3 | 37.93 | 0.61 | 1.88 | 0.92 | 1.66 | 0.06 | 0.00 | 0.00 | N.D  | N.D | N.D | 0.07 | N.D | 0.03 | 43.15 |
| 752 | Cauliflower<br>snacks                        | Vegetable<br>s                                | 1.95  | cluster3 | 41.53 | 0.63 | N.D  | 0.25 | 0.73 | N.D  | 0.09 | N.D  | 0.32 | N.D | N.D | 0.33 | N.D | 0.05 | 43.92 |
| 753 | Dried<br>philippines<br>mango<br>(Mariani)   | Fruits                                        | 4.38  | cluster3 | 38.58 | 0.45 | 4.96 | 0.22 | 0.66 | N.D  | 0.07 | N.D  | 0.64 | N.D | N.D | 0.15 | N.D | 0.03 | 45.76 |
| 754 | Freeze dried<br>mandarins                    | Fruits                                        | 5.88  | cluster3 | 39.82 | 0.95 | 2.32 | 0.10 | 0.83 | N.D  | 0.27 | N.D  | 1.11 | N.D | N.D | 0.12 | N.D | 0.02 | 45.54 |
| 755 | Cheesy<br>crackers                           | Milk and<br>Milk<br>Products                  | 2.27  | cluster3 | 38.28 | 0.32 | 0.49 | 0.32 | 0.69 | 0.05 | 0.00 | 0.00 | N.D  | N.D | N.D | 0.05 | N.D | 0.02 | 40.23 |
| 756 | Bean chips                                   | Beans,<br>Peas,<br>Legumes,<br>Nuts,<br>Seeds | 0.89  | cluster3 | 41.13 | 1.64 | 0.63 | 0.58 | 5.00 | 0.25 | 0.05 | 0.05 | 0.14 | N.D | N.D | 0.21 | N.D | 0.06 | 49.75 |

|     |                                            |                                   |       |          |       |      |      |      |      |      |      |      |      |      |      |      |      |      |       |
|-----|--------------------------------------------|-----------------------------------|-------|----------|-------|------|------|------|------|------|------|------|------|------|------|------|------|------|-------|
| 757 | Sea Salt Mini Rice Cake                    | Grain Products                    | 0.82  | cluster3 | 39.75 | 0.10 | 0.12 | 0.18 | 0.29 | 0.02 | 0.00 | 0.00 | 0.00 | N.D  | N.D  | 0.03 | N.D  | 0.01 | 40.51 |
| 758 | Organic Honey Flakes & Oat Cluster Cereals | Grain Products                    | 2.93  | cluster3 | 42.50 | 0.42 | 2.31 | 0.24 | 0.68 | 0.01 | 0.00 | 0.00 | 0.00 | N.D  | N.D  | N.D  | N.D  | 0.01 | 46.18 |
| 759 | Original Go Rise Cereals                   | Grain Products                    | 3.79  | cluster3 | 37.19 | 1.61 | 0.34 | 2.18 | 1.73 | 0.12 | 0.05 | 0.02 | 0.07 | N.D  | N.D  | 0.18 | N.D  | 0.04 | 43.54 |
| 760 | Granola                                    | Grain Products                    | 0.59  | cluster3 | 45.44 | 0.53 | 0.80 | 0.41 | 0.46 | 0.09 | 0.01 | 0.01 | 0.01 | N.D  | N.D  | 0.11 | N.D  | 0.03 | 47.90 |
| 761 | White bean chips                           | Beans, Peas, Legumes, Nuts, Seeds | 0.40  | cluster3 | 39.00 | 0.75 | 0.37 | 0.24 | 1.54 | 0.08 | 0.03 | 0.02 | 0.06 | 0.00 | N.D  | 0.20 | N.D  | 0.03 | 42.34 |
| 762 | Super seed crackers                        | Grain Products                    | 1.05  | cluster3 | 36.37 | 0.42 | 0.39 | 0.45 | 0.71 | 0.04 | 0.08 | 0.01 | 0.09 | 0.00 | N.D  | 0.23 | N.D  | 0.03 | 38.81 |
| 763 | Hummus crisps w/ rosemary and olive oil    | Beans, Peas, Legumes, Nuts, Seeds | 2.00  | cluster3 | 43.20 | 1.32 | 0.53 | 0.13 | 1.47 | 0.02 | 0.05 | 0.02 | 0.06 | 0.00 | N.D  | 0.07 | N.D  | 0.04 | 46.90 |
| 764 | Good seed bread                            | Grain Products                    | 26.72 | cluster3 | 38.35 | 0.47 | 1.01 | 0.81 | 0.73 | 0.02 | 0.02 | 0.00 | 0.04 | 0.00 | N.D  | 0.24 | N.D  | 0.03 | 41.73 |
| 765 | White bread                                | Grain Products                    | 35.71 | cluster3 | 36.53 | 0.29 | 0.48 | 0.60 | 0.68 | 0.01 | 0.00 | 0.00 | 0.01 | 0.00 | N.D  | 0.16 | N.D  | 0.02 | 38.80 |
| 766 | Bean and cheese burrito                    | Grain Products                    | 52.06 | cluster3 | 40.99 | 1.18 | 0.52 | 0.92 | 3.23 | 0.12 | 0.06 | 0.03 | 0.08 | 0.01 | 0.01 | 0.32 | N.D  | 0.05 | 47.51 |
| 767 | Righteous rye bread                        | Grain Products                    | 28.61 | cluster3 | 36.76 | 0.45 | 0.79 | 0.81 | 0.70 | 0.01 | 0.01 | 0.01 | 0.02 | 0.00 | N.D  | 0.34 | N.D  | 0.04 | 39.95 |
| 768 | Peanut butter pretzel                      | Grain Products                    | 2.44  | cluster3 | 44.95 | 0.68 | 0.66 | 0.51 | 0.91 | 0.04 | 0.04 | 0.01 | 0.08 | 0.00 | N.D  | 0.12 | N.D  | 0.02 | 48.03 |
| 769 | Cauliflower tortillas                      | Vegetable s                       | 27.51 | cluster3 | 41.65 | 0.89 | N.D  | 0.08 | 0.36 | 0.03 | 0.02 | 0.01 | 0.17 | 0.00 | N.D  | 0.60 | N.D  | 0.01 | 43.84 |
| 770 | Chocolate chip cookies                     | Grain Products                    | 1.92  | cluster3 | 67.88 | 0.57 | 1.65 | 0.54 | 0.57 | N.D  | 0.01 | N.D  | 0.05 | N.D  | N.D  | N.D  | 0.01 | N.D  | 71.27 |
| 771 | Corn cereal (corn flakes)                  | Grain Products                    | 1.47  | cluster3 | 69.40 | 0.30 | N.D  | 0.12 | 0.24 | N.D  | 0.00 | N.D  | 0.01 | N.D  | N.D  | N.D  | N.D  | N.D  | 70.07 |

|     |                                  |                 |       |          |       |      |      |      |      |      |      |      |      |     |     |      |      |      |       |
|-----|----------------------------------|-----------------|-------|----------|-------|------|------|------|------|------|------|------|------|-----|-----|------|------|------|-------|
| 772 | Honey nut oat cereal             | Grain Products  | 1.69  | cluster3 | 70.13 | 0.91 | 6.62 | 1.28 | 1.05 | N.D  | 0.01 | N.D  | 0.07 | N.D | N.D | 0.07 | 0.04 | N.D  | 80.19 |
| 773 | Buttermilk pancake/waffle flour  | Grain Products  | 7.27  | cluster3 | 70.52 | 3.37 | N.D  | 1.71 | 1.43 | N.D  | N.D  | N.D  | 0.01 | N.D | N.D | 0.16 | 0.03 | N.D  | 77.23 |
| 774 | Multigrain cereal (Gerber)       | Grain Products  | 3.20  | cluster3 | 71.66 | 1.05 | N.D  | 3.08 | 2.58 | N.D  | 0.01 | N.D  | 0.04 | N.D | N.D | 0.36 | N.D  | N.D  | 78.78 |
| 775 | Whole wheat cereal (Gerber)      | Grain Products  | 3.33  | cluster3 | 71.71 | 1.11 | N.D  | 5.45 | 3.96 | N.D  | 0.02 | N.D  | 0.04 | N.D | N.D | 0.42 | N.D  | N.D  | 82.72 |
| 776 | Multigrain cereal (Earth's best) | Grain Products  | 5.05  | cluster3 | 68.64 | 0.73 | N.D  | 0.81 | 0.75 | N.D  | 0.01 | N.D  | 0.02 | N.D | N.D | 0.32 | N.D  | N.D  | 71.27 |
| 777 | Corn flakes cereal               | Grain Products  | 3.87  | cluster3 | 69.92 | 0.27 | 1.06 | 0.10 | 0.27 | 0.03 | 0.00 | 0.00 | N.D  | N.D | N.D | 0.04 | N.D  | 0.02 | 71.72 |
| 778 | Thin crackers                    | Grain Products  | 1.85  | cluster3 | 65.91 | 0.24 | 0.76 | 0.13 | 0.82 | 0.04 | 0.02 | 0.00 | N.D  | N.D | N.D | 0.52 | N.D  | 0.04 | 68.50 |
| 779 | Cinnamon Toast Rice Cake         | Grain Products  | 7.50  | cluster3 | 69.51 | 0.18 | 1.32 | 0.41 | 1.12 | 0.02 | 0.01 | 0.00 | 0.02 | N.D | N.D | 0.07 | N.D  | 0.03 | 72.71 |
| 780 | 5 Grain Rice Cake                | Grain Products  | 5.44  | cluster3 | 67.92 | 0.21 | 0.63 | 0.31 | 1.26 | 0.03 | 0.03 | 0.00 | 0.01 | N.D | N.D | 0.07 | N.D  | 0.04 | 70.49 |
| 781 | Salt-free Brown Rice Rice Cake   | Grain Products  | 6.88  | cluster3 | 72.31 | 0.21 | 0.53 | 0.43 | 0.87 | 0.04 | 0.01 | 0.01 | 0.01 | N.D | N.D | 0.09 | N.D  | 0.03 | 74.53 |
| 782 | Apple Pie Mini Rice Cake         | Grain Products  | 1.39  | cluster3 | 65.74 | 0.64 | 0.24 | 0.26 | 0.45 | 0.03 | 0.01 | 0.00 | 0.01 | N.D | N.D | 0.06 | N.D  | 0.01 | 67.46 |
| 783 | Thin Almond Nut Rice Crackers    | Grain Products  | 0.38  | cluster3 | 66.15 | N.D  | 0.59 | 0.10 | 1.71 | 0.02 | 0.02 | 0.01 | 0.02 | N.D | N.D | 0.05 | N.D  | 0.03 | 68.71 |
| 784 | Organic Frosted Flakes Cereals   | Grain Products  | 2.48  | cluster3 | 67.08 | 0.16 | 4.23 | 0.07 | 0.56 | 0.04 | 0.00 | 0.00 | 0.00 | N.D | N.D | 0.04 | N.D  | 0.00 | 72.19 |
| 785 | Organic Morning O's Cereals      | Grain Products  | 3.71  | cluster3 | 66.58 | 0.99 | 0.60 | 1.10 | 3.64 | 0.07 | 0.02 | 0.01 | 0.01 | N.D | N.D | 0.13 | N.D  | 0.05 | 73.18 |
| 786 | Cornmeal                         | Grain Products  | 10.77 | cluster3 | 67.37 | 0.07 | 0.66 | 0.39 | 0.65 | 0.02 | 0.01 | 0.00 | 0.01 | N.D | N.D | 0.05 | N.D  | 0.01 | 69.24 |
| 787 | Jolly rancher candy              | Sugars, Sweets, | 0.04  | cluster3 | 66.05 | 0.15 | 4.23 | 0.00 | 0.09 | 0.08 | 0.00 | 0.00 | 0.00 | N.D | N.D | 0.02 | N.D  | 0.00 | 70.63 |

|                  |                                           |                                   |      |          |       |      |      |      |      |      |      |      |      |      |     |      |      |      |       |
|------------------|-------------------------------------------|-----------------------------------|------|----------|-------|------|------|------|------|------|------|------|------|------|-----|------|------|------|-------|
| and<br>Beverages |                                           |                                   |      |          |       |      |      |      |      |      |      |      |      |      |     |      |      |      |       |
| 788              | Puffed rice cereal                        | Grain Products                    | 4.94 | cluster3 | 69.47 | 0.46 | 0.50 | 0.31 | 0.44 | 0.01 | 0.01 | 0.01 | 0.02 | 0.00 | N.D | 0.05 | N.D  | 0.02 | 71.29 |
| 789              | Vanilla cookies                           | Grain Products                    | 1.29 | cluster3 | 52.98 | 0.31 | 0.68 | 0.27 | 0.58 | 0.10 | 0.00 | N.D  | N.D  | N.D  | N.D | 0.10 | N.D  | 0.03 | 55.04 |
| 790              | Multi grain cereal                        | Grain Products                    | 2.57 | cluster3 | 56.03 | 0.67 | 3.66 | 0.71 | 0.70 | N.D  | 0.01 | N.D  | 0.03 | N.D  | N.D | N.D  | 0.03 | N.D  | 61.81 |
| 791              | Whole grain oat cereal                    | Grain Products                    | 1.86 | cluster3 | 61.12 | 1.07 | 3.33 | 0.33 | 0.46 | N.D  | 0.00 | N.D  | 0.03 | N.D  | N.D | N.D  | 0.05 | N.D  | 66.40 |
| 792              | Whole grain oatmeal cereal (Earth's best) | Grain Products                    | 2.78 | cluster3 | 53.55 | 0.39 | 0.46 | 0.72 | 1.45 | 0.08 | 0.01 | 0.01 | 0.01 | N.D  | N.D | 0.10 | N.D  | 0.06 | 56.84 |
| 793              | Puffed Kamut cereal                       | Grain Products                    | 5.53 | cluster3 | 55.57 | 0.20 | 0.84 | 1.47 | 1.33 | 0.03 | 0.00 | 0.01 | 0.01 | N.D  | N.D | 0.08 | N.D  | 0.03 | 59.58 |
| 794              | Green pea snack crisps                    | Beans, Peas, Legumes, Nuts, Seeds | 3.55 | cluster3 | 58.83 | 4.72 | 0.10 | 0.31 | 2.99 | N.D  | 0.17 | N.D  | 0.60 | N.D  | N.D | N.D  | N.D  | 0.12 | 67.85 |
| 795              | Oat crunch cereal                         | Grain Products                    | 3.84 | cluster3 | 61.82 | 0.41 | 2.85 | 0.68 | 1.55 | 0.06 | 0.01 | 0.01 | N.D  | N.D  | N.D | 0.09 | N.D  | 0.05 | 67.52 |
| 796              | Multigrain cereal (Barbaras)              | Grain Products                    | 4.13 | cluster3 | 55.24 | 0.32 | 2.33 | 0.76 | 1.14 | 0.04 | 0.01 | 0.01 | N.D  | N.D  | N.D | 0.07 | N.D  | 0.04 | 59.95 |
| 797              | Coconut almond chia cereal                | Grain Products                    | 1.12 | cluster3 | 58.12 | 0.22 | 1.48 | 0.70 | 1.54 | 0.05 | 0.00 | 0.01 | 0.01 | N.D  | N.D | 0.08 | N.D  | 0.04 | 62.25 |
| 798              | Wheat crackers (Organic Trsicut)          | Grain Products                    | 3.02 | cluster3 | 61.16 | 0.65 | 0.91 | 1.28 | 2.63 | 0.03 | 0.00 | 0.01 | 0.01 | N.D  | N.D | 0.11 | N.D  | 0.03 | 66.83 |
| 799              | Pea snacks                                | Beans, Peas, Legumes, Nuts, Seeds | 2.08 | cluster3 | 54.52 | 2.74 | N.D  | 1.96 | 2.93 | N.D  | 0.24 | N.D  | 1.14 | N.D  | N.D | 0.08 | N.D  | 0.10 | 63.70 |
| 800              | Plantain chips                            | Fruits                            | 1.78 | cluster3 | 54.80 | 0.16 | 1.06 | 0.10 | 0.32 | 0.08 | 0.00 | 0.01 | 0.06 | N.D  | N.D | 0.13 | N.D  | 0.02 | 56.74 |

|     |                                                    |                |      |          |       |      |      |      |      |      |      |      |      |     |     |      |     |      |       |
|-----|----------------------------------------------------|----------------|------|----------|-------|------|------|------|------|------|------|------|------|-----|-----|------|-----|------|-------|
| 801 | Banana chips                                       | Fruits         | 2.24 | cluster3 | 60.03 | N.D  | 2.20 | 0.16 | 0.32 | N.D  | 0.01 | N.D  | 0.68 | N.D | N.D | 0.31 | N.D | 0.04 | 63.74 |
| 802 | Animal shaped crackers                             | Grain Products | 3.62 | cluster3 | 60.47 | 0.21 | 2.27 | 0.42 | 0.56 | 0.07 | 0.00 | 0.00 | N.D  | N.D | N.D | 0.12 | N.D | 0.03 | 64.16 |
| 803 | Cheese crackers                                    | Grain Products | 2.70 | cluster3 | 52.77 | 1.43 | 1.19 | 0.33 | 0.44 | 0.04 | 0.00 | 0.00 | N.D  | N.D | N.D | 0.08 | N.D | 0.02 | 56.30 |
| 804 | White cheddar corn puff                            | Grain Products | 2.64 | cluster3 | 55.76 | 1.99 | 0.79 | 0.21 | 0.61 | 0.05 | 0.01 | 0.01 | 0.01 | N.D | N.D | 0.04 | N.D | 0.03 | 59.50 |
| 805 | Vegetable chips                                    | Vegetables     | 2.11 | cluster3 | 59.01 | 0.81 | 0.64 | 0.03 | 0.33 | 0.11 | 0.02 | N.D  | 0.05 | N.D | N.D | 0.03 | N.D | 0.02 | 61.06 |
| 806 | Popcorn                                            | Grain Products | 2.50 | cluster3 | 53.64 | 0.24 | 0.56 | 0.43 | 0.84 | 0.03 | 0.00 | 0.01 | 0.01 | N.D | N.D | 0.04 | N.D | 0.03 | 55.83 |
| 807 | Red Rice & Quinoa Rice Cake                        | Grain Products | 5.97 | cluster3 | 54.33 | 0.21 | 0.41 | 0.29 | 0.79 | 0.02 | 0.01 | 0.00 | 0.01 | N.D | N.D | 0.06 | N.D | 0.02 | 56.15 |
| 808 | White Cheddar Mini Rice Cake                       | Grain Products | 0.23 | cluster3 | 55.37 | 0.94 | 0.44 | 0.35 | 0.72 | 0.04 | 0.01 | 0.00 | 0.02 | N.D | N.D | 0.07 | N.D | 0.03 | 58.00 |
| 809 | Saltine Crackers                                   | Grain Products | 2.71 | cluster3 | 56.65 | 0.44 | 0.19 | 0.49 | 0.65 | 0.02 | 0.00 | 0.00 | 0.00 | N.D | N.D | 0.19 | N.D | 0.01 | 58.65 |
| 810 | Classic Crackers                                   | Grain Products | 3.89 | cluster3 | 58.74 | 0.45 | 0.25 | 0.57 | 0.69 | 0.03 | 0.00 | 0.00 | 0.00 | N.D | N.D | 0.11 | N.D | 0.01 | 60.85 |
| 811 | Sprouted Crunchy Golden Flax Cereal                | Grain Products | 1.44 | cluster3 | 53.49 | 0.32 | 0.60 | 1.85 | 2.03 | 0.03 | 0.02 | 0.01 | 0.01 | N.D | N.D | 0.11 | N.D | 0.03 | 58.49 |
| 812 | Toasted Whole Wheat Berry Flakes & Flaxseed Cereal | Grain Products | 0.43 | cluster3 | 62.27 | 0.36 | 0.98 | 1.95 | 2.27 | 0.01 | 0.01 | 0.01 | 0.00 | N.D | N.D | 0.14 | N.D | 0.02 | 68.02 |
| 813 | Organic Morning O's Honey Nut Cereals              | Grain Products | 2.82 | cluster3 | 62.01 | 0.13 | 3.86 | 0.56 | 1.45 | 0.02 | 0.01 | 0.01 | 0.01 | N.D | N.D | 0.09 | N.D | 0.05 | 68.20 |
| 814 | Rainbow Morning O's Cereals                        | Grain Products | 3.71 | cluster3 | 54.46 | 0.18 | 2.87 | 0.41 | 0.99 | 0.05 | 0.01 | 0.00 | 0.01 | N.D | N.D | 0.05 | N.D | 0.01 | 59.05 |
| 815 | Heritage Flakes                                    | Grain Products | 0.94 | cluster3 | 52.08 | 0.54 | 0.40 | 1.29 | 1.43 | 0.03 | 0.01 | 0.01 | 0.01 | N.D | N.D | 0.10 | N.D | 0.02 | 55.91 |



|     |                                              |                                            |       |          |       |      |      |      |      |      |      |      |      |      |     |      |      |      |       |
|-----|----------------------------------------------|--------------------------------------------|-------|----------|-------|------|------|------|------|------|------|------|------|------|-----|------|------|------|-------|
| 816 | Autumn Wheat<br>Whole Wheat<br>Biscuit       | Grain<br>Products                          | 4.81  | cluster3 | 56.74 | 0.80 | 3.88 | 0.95 | 5.02 | 0.03 | 0.01 | 0.01 | 0.00 | N.D  | N.D | 0.12 | N.D  | 0.03 | 67.58 |
| 817 | All purpose<br>flour                         | Grain<br>Products                          | 9.09  | cluster3 | 59.33 | 0.17 | 0.55 | 0.70 | 0.74 | 0.03 | 0.00 | 0.00 | 0.00 | N.D  | N.D | 0.15 | N.D  | 0.01 | 61.67 |
| 818 | Veggie crisps                                | Grain<br>Products                          | 2.43  | cluster3 | 61.68 | 0.84 | 0.47 | 0.15 | 0.83 | 0.02 | 0.03 | 0.01 | 0.04 | 0.00 | N.D | 0.07 | N.D  | 0.05 | 64.18 |
| 819 | Aged white<br>cheddar rice<br>and corn puffs | Grain<br>Products                          | 2.94  | cluster3 | 53.81 | 1.05 | 0.41 | 0.11 | 0.26 | 0.01 | 0.00 | 0.01 | 0.01 | 0.00 | N.D | 0.05 | N.D  | 0.02 | 55.72 |
| 820 | Chicken strips                               | Meat,<br>Poultry,<br>Fish, and<br>Mixtures | 37.39 | cluster3 | 59.02 | 0.46 | 0.36 | 0.68 | 0.70 | 0.02 | 0.00 | 0.01 | 0.01 | 0.00 | N.D | 0.15 | N.D  | 0.10 | 61.50 |
| 821 | Crunchy<br>breaded fish<br>fillet            | Meat,<br>Poultry,<br>Fish, and<br>Mixtures | 36.76 | cluster3 | 56.55 | 0.84 | 0.37 | 0.58 | 0.75 | 0.02 | 0.00 | 0.00 | 0.00 | 0.00 | N.D | 0.12 | N.D  | 0.04 | 59.28 |
| 822 | Crispy battered<br>fish fillet               | Meat,<br>Poultry,<br>Fish, and<br>Mixtures | 27.16 | cluster3 | 52.27 | 0.66 | 0.16 | 0.23 | 0.34 | 0.02 | 0.00 | 0.00 | 0.01 | 0.00 | N.D | 0.08 | N.D  | 0.07 | 53.84 |
| 823 | Rice cereal                                  | Grain<br>Products                          | 0.24  | cluster4 | 82.31 | 0.37 | 0.18 | 0.37 | 0.40 | N.D  | 0.01 | N.D  | 0.00 | N.D  | N.D | N.D  | 0.03 | N.D  | 83.67 |
| 824 | Single grain<br>oatmeal cereal<br>(Gerber)   | Grain<br>Products                          | 3.44  | cluster4 | 81.26 | 1.28 | N.D  | 1.65 | 1.33 | N.D  | 0.01 | N.D  | 0.05 | N.D  | N.D | 0.48 | N.D  | N.D  | 86.05 |
| 825 | Rice cereal<br>(Gerber)                      | Grain<br>Products                          | 4.35  | cluster4 | 76.74 | 0.19 | 0.55 | 0.05 | 0.36 | 0.03 | 0.00 | 0.00 | 0.01 | N.D  | N.D | 0.06 | N.D  | 0.04 | 78.04 |
| 826 | Puffed corn<br>cereal                        | Grain<br>Products                          | 2.33  | cluster4 | 75.29 | 0.14 | N.D  | 0.20 | 0.32 | N.D  | 0.01 | N.D  | 0.03 | N.D  | N.D | N.D  | N.D  | 0.02 | 76.01 |
| 827 | Crisp rice<br>receal                         | Grain<br>Products                          | 2.19  | cluster4 | 75.49 | 0.28 | 1.80 | 0.05 | 0.27 | 0.03 | 0.00 | 0.00 | N.D  | N.D  | N.D | 0.03 | N.D  | 0.03 | 77.99 |
| 828 | Corn Starch                                  | Grain<br>Products                          | 6.00  | cluster4 | 89.80 | 0.34 | 0.69 | 0.00 | 0.10 | 0.03 | 0.00 | 0.00 | 0.00 | N.D  | N.D | 0.02 | N.D  | 0.00 | 90.99 |

\*The fructose value for table sugar was corrected for degradation during hydrolysis by an empirical factor.
